# Supplementary material for: Design and synthesis of 2-phenyl-1 H -benzo[ d ]imidazole derivatives as 17β-HSD10 inhibitors for the treatment of Alzheimer's disease
Source: Royal Society of Chemistry journal article supplement (doi:10.1039/d4md00861h), 2025-01-01
Supplement: d4md00861h1.pdf [file d4md00861h1.pdf]

**Design, synthesis of 2-phenyl-1H-benzo[d]imidazole derivatives as 17 $\beta$ -HSD10  
inhibitor for the treatment of Alzheimer's Disease**

Xiao Han Liu <sup>a,#</sup>, Bin Zhou <sup>a,#</sup>, Yan Chen <sup>c</sup>, Jinyuan Lin <sup>b</sup>, Chenwen Shao <sup>c</sup>, Liuzeng  
Chen <sup>a</sup>, Banfeng Ruan <sup>a,\*</sup>, Xing Xing Zhang <sup>a,\*</sup> and Yong Qian <sup>b,\*</sup>

*<sup>a</sup>School of Biology, Food and Environment, Hefei University, Hefei 230601, P. R.*

*China;*

*<sup>b</sup>Jiangsu Collaborative Innovation Center of Biomedical Functional Materials,*

*School of Chemistry and Materials Science Nanjing Normal University,*

*Nanjing 210023, P. R. China;*

*<sup>c</sup>Wuxi School of Medicine, Jiangnan University, Wuxi 214000, P. R. China*

**Contents**

**1. <sup>1</sup>H NMR, <sup>13</sup>C NMR, HRMS.....S2**

4-(4,6-dimethyl-1H-benzo[d]imidazol-2-yl)aniline (H1)

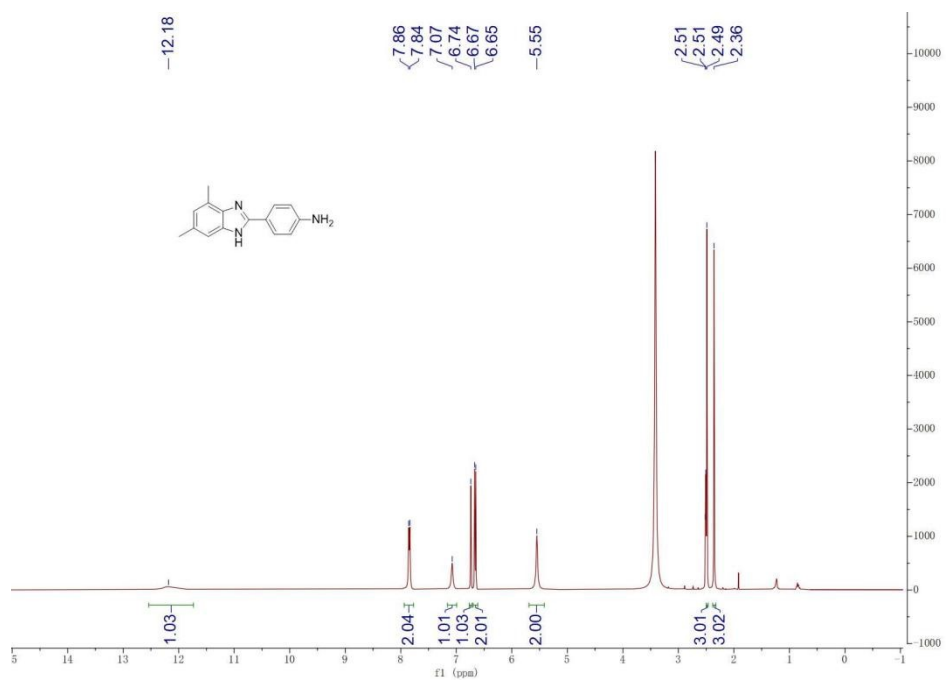

<sup>1</sup>H NMR of compound H1

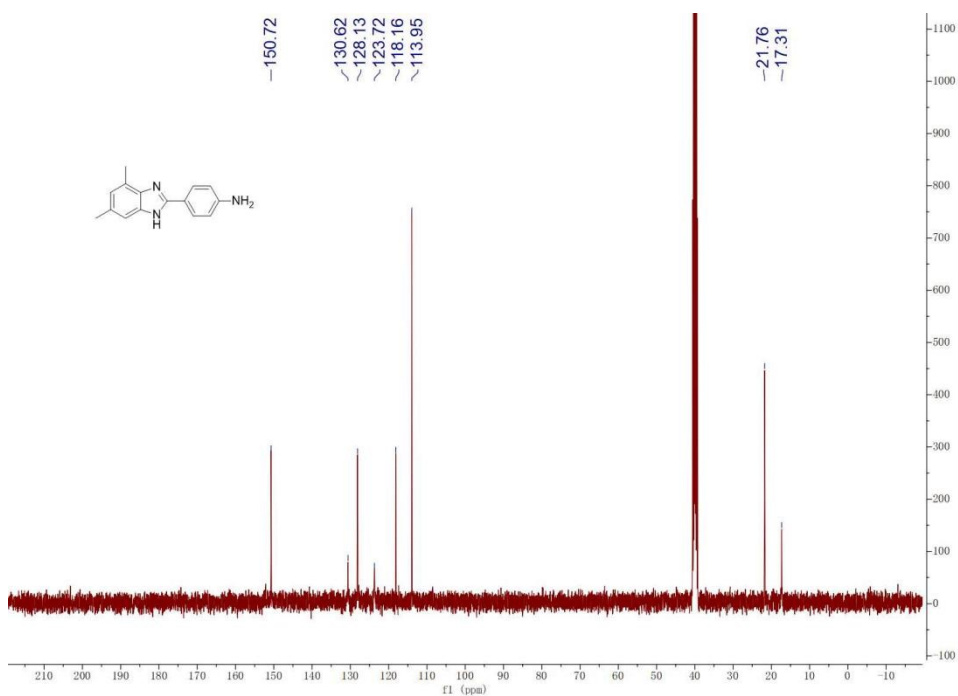

<sup>13</sup>C NMR of compound H1

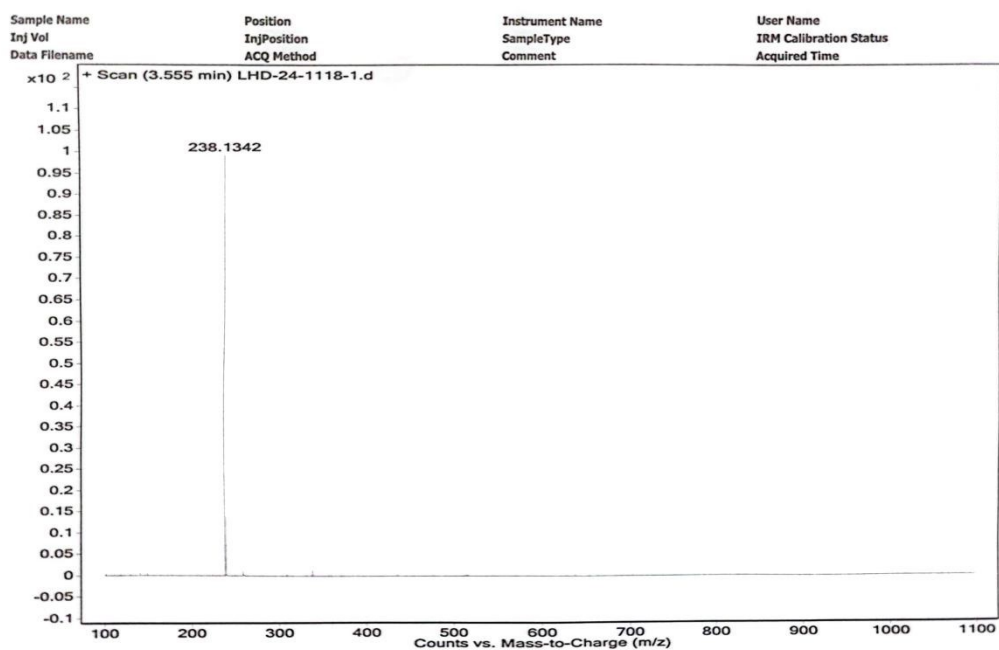

HR-MS of compound H1

2-(4-fluorophenyl)-4,6-dimethyl-1H-benzo[d]imidazole (1)

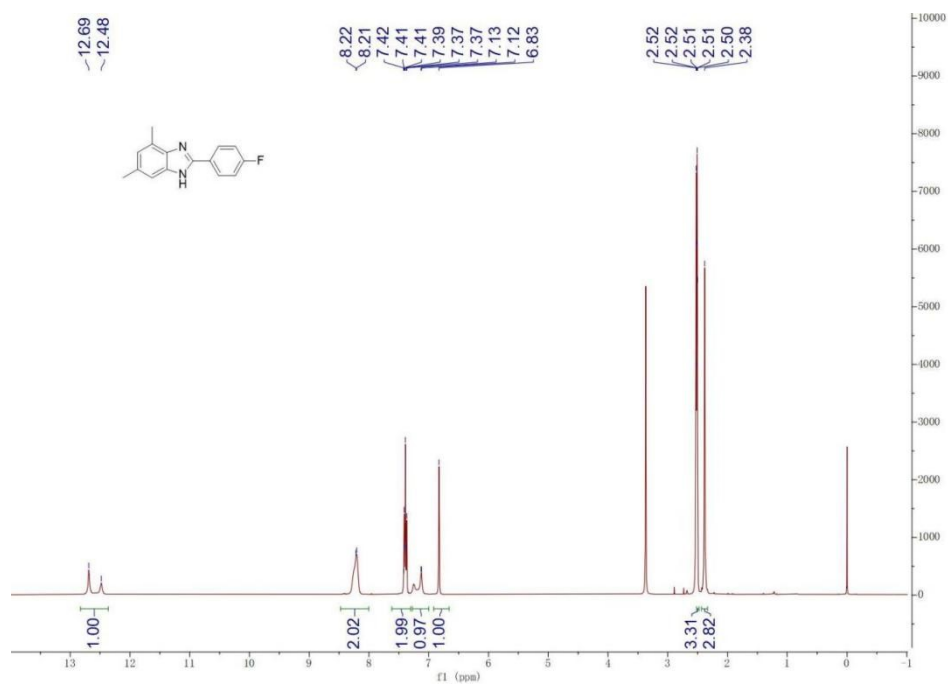

<sup>1</sup>H NMR of compound 1

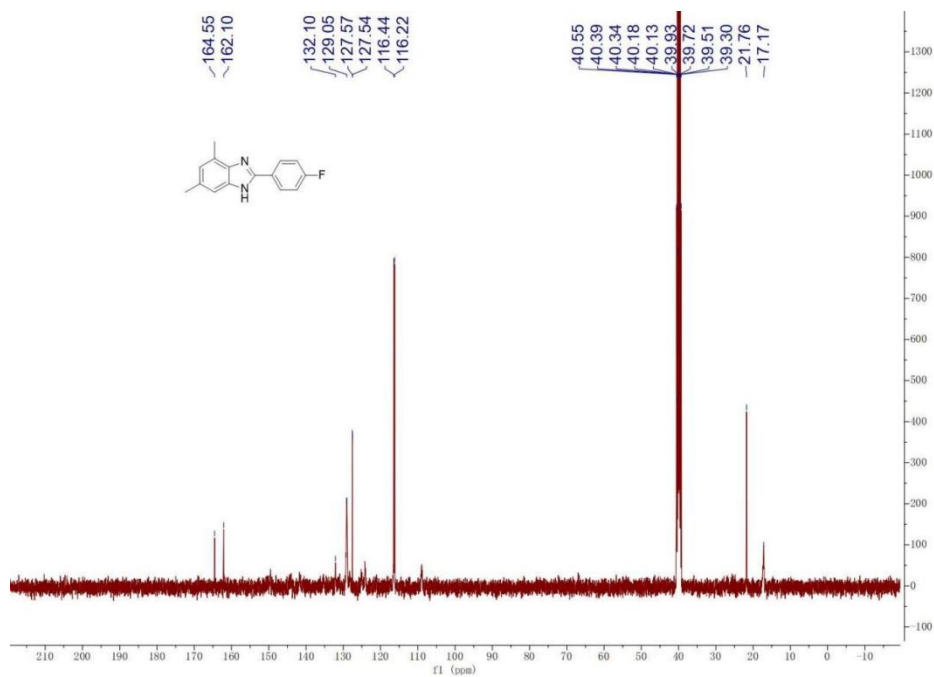

<sup>13</sup>C NMR of compound 1

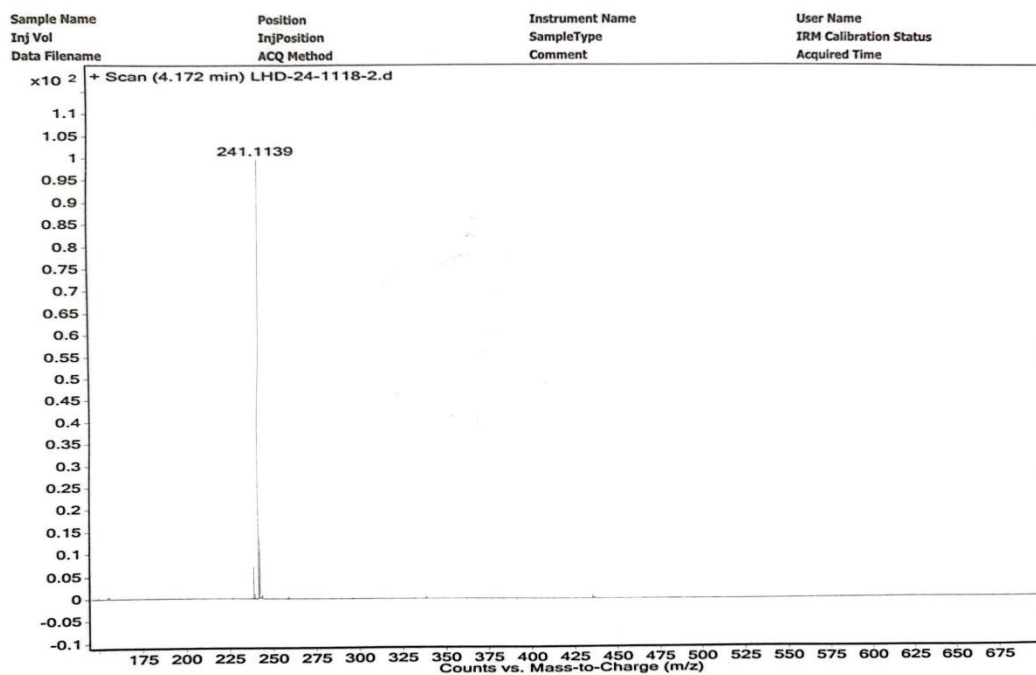

HR-MS of compound 1

2-(4-chlorophenyl)-4,6-dimethyl-1H-benzo[d]imidazole (2)

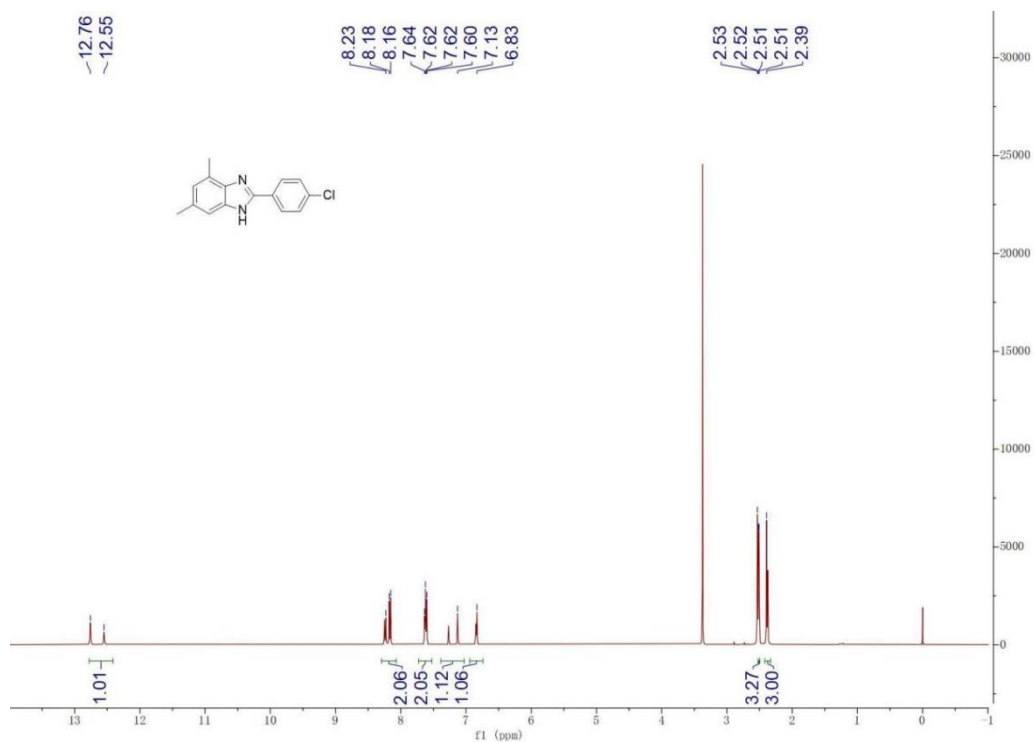

<sup>1</sup>H NMR of compound 2

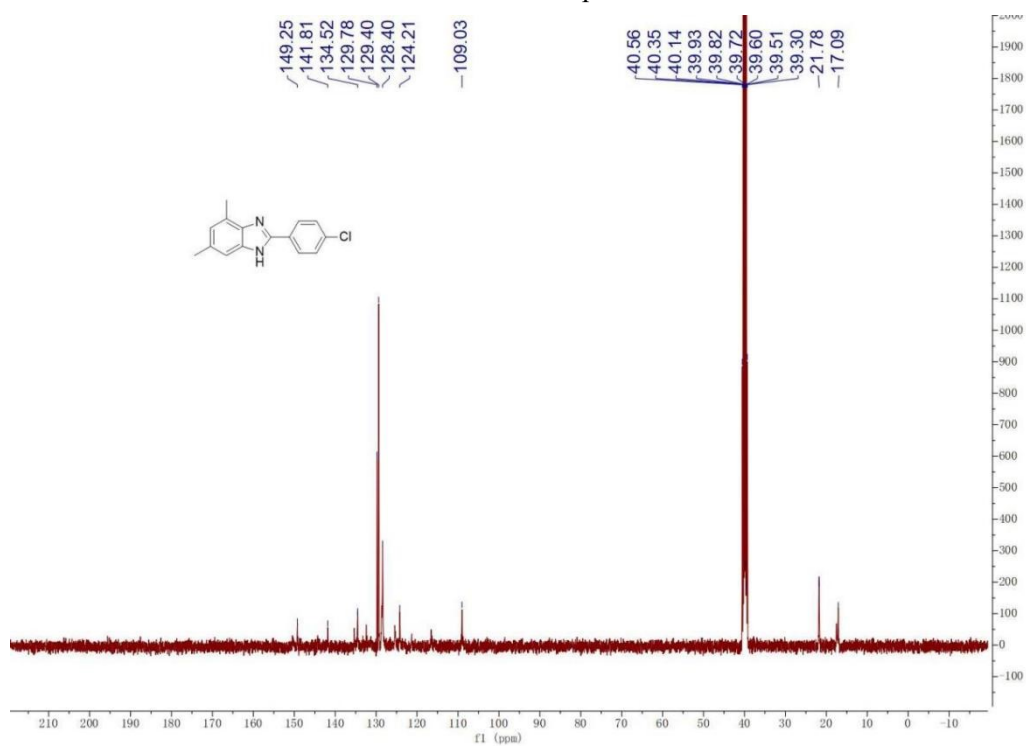

<sup>13</sup>C NMR of compound 2

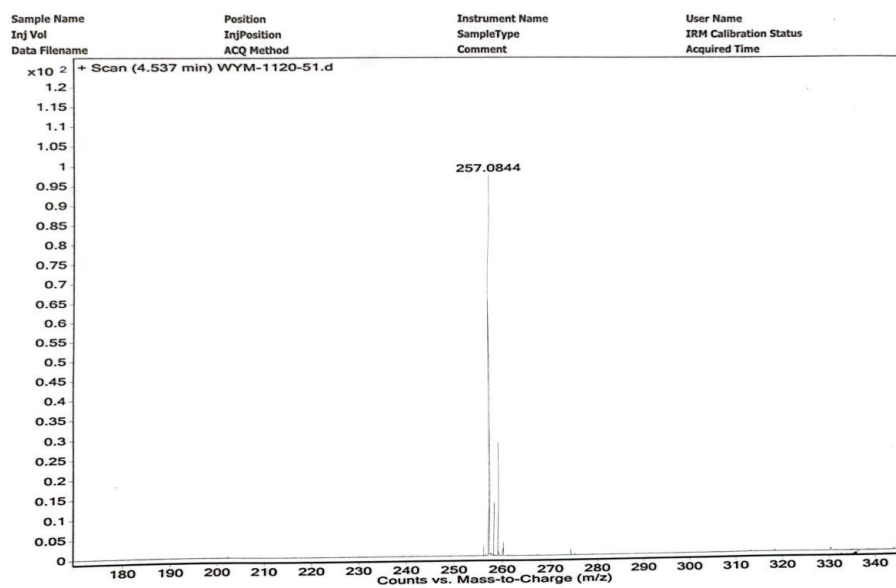

HR-MS of compound 2

4,6-dimethyl-2-(p-tolyl)-1H-benzo[d]imidazole (3)

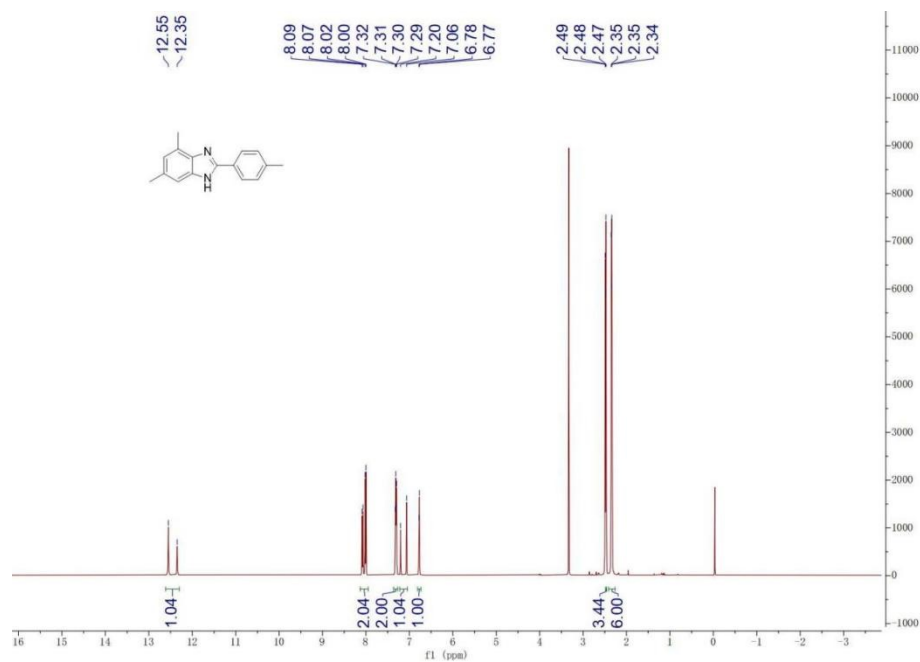

<sup>1</sup>H NMR of compound 3

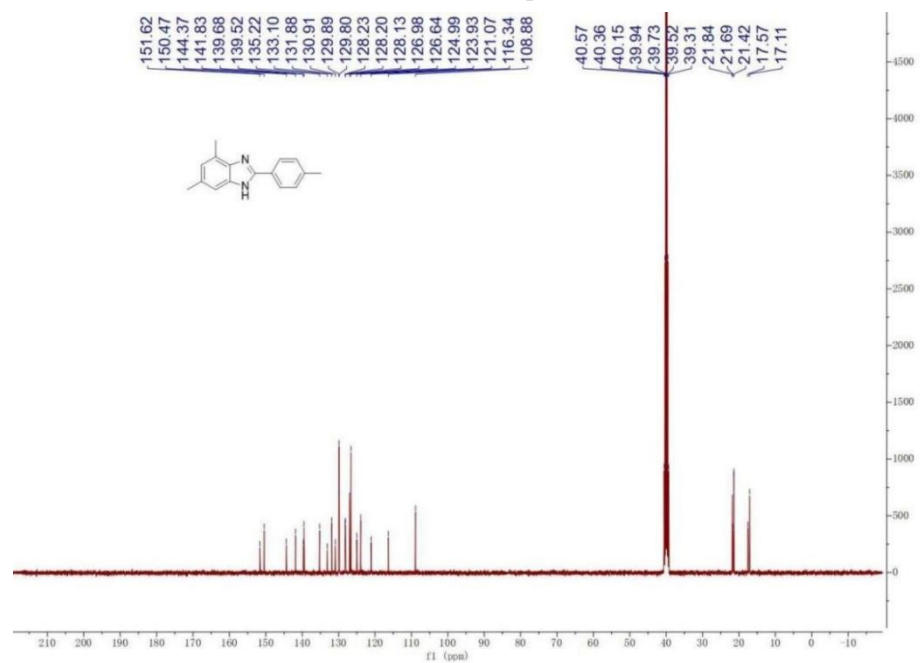

<sup>13</sup>C NMR of compound 3



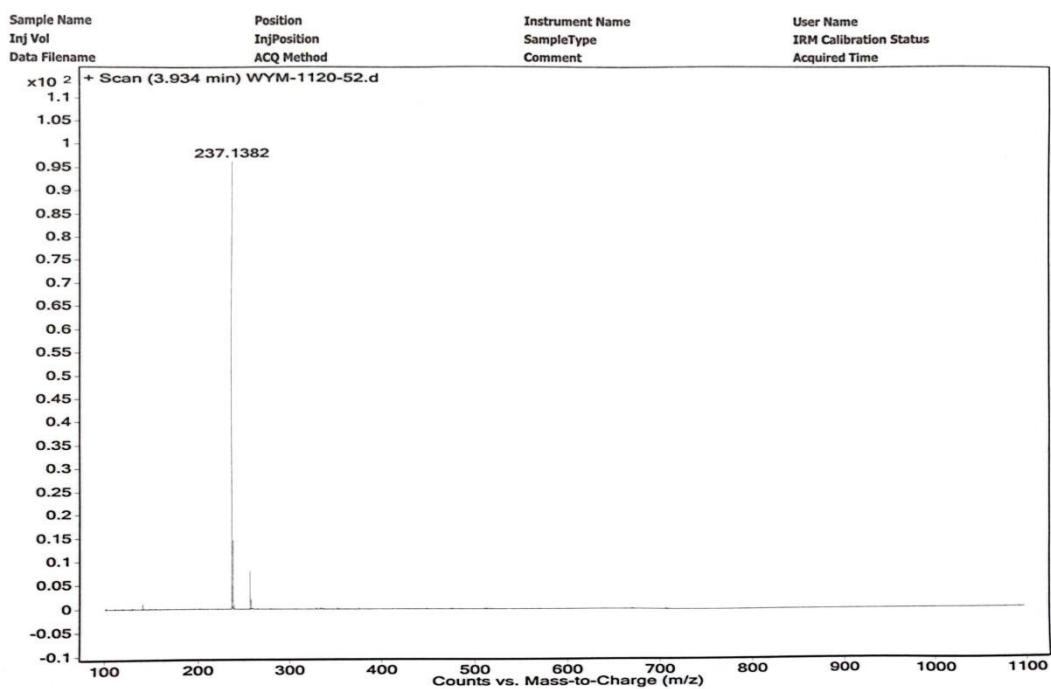

HR-MS of compound 3

4,6-dimethyl-2-(4-nitrophenyl)-1H-benzo[d]imidazole (4)

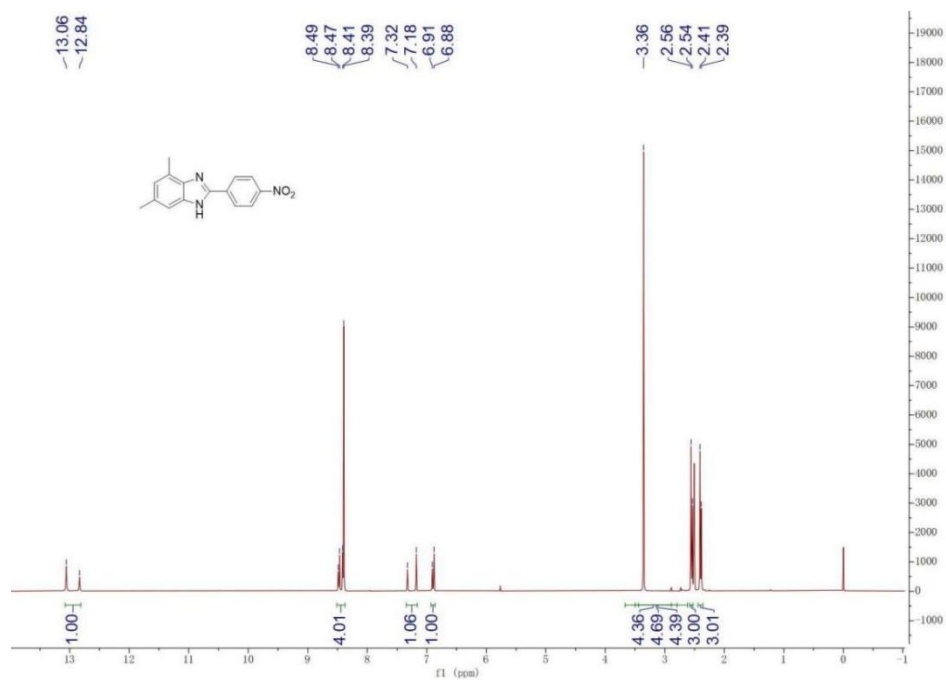

<sup>1</sup>H NMR of compound 4

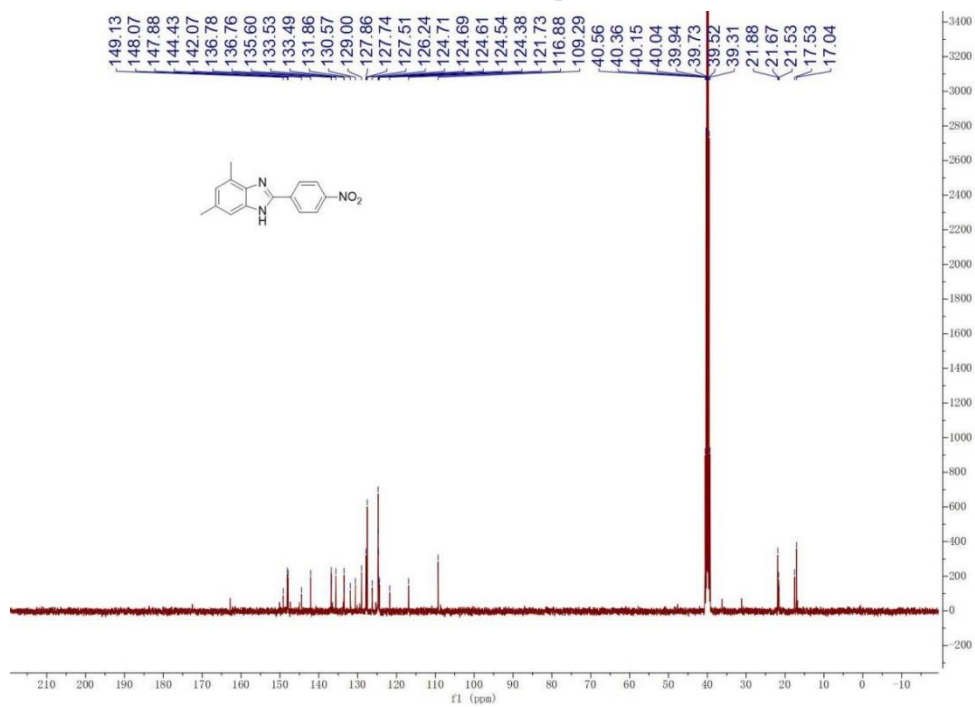

<sup>13</sup>C NMR of compound 4

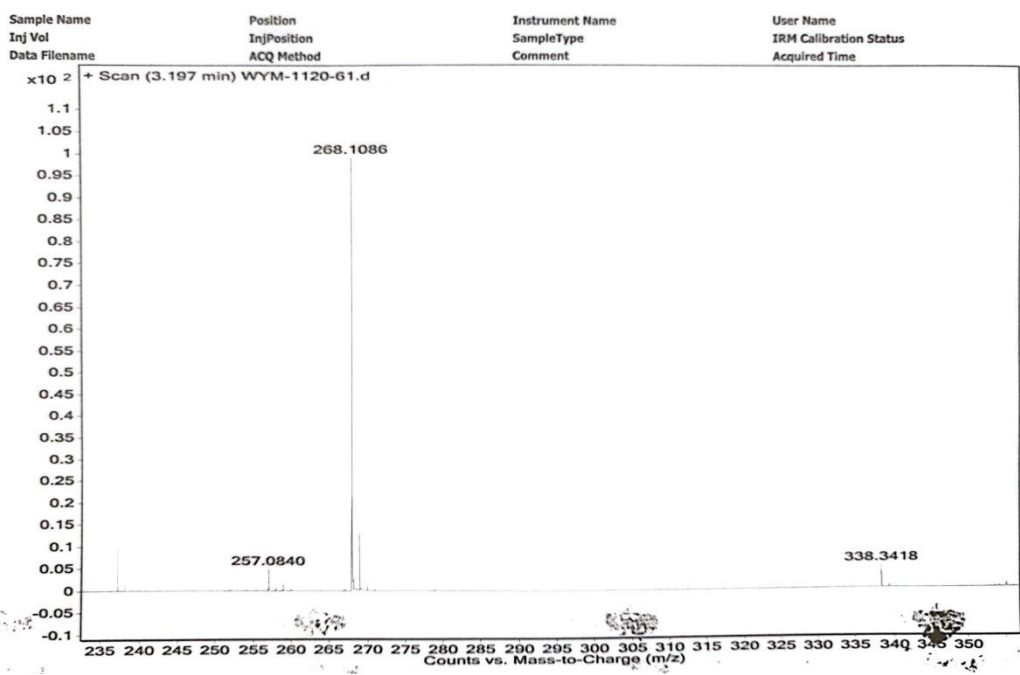

HR-MS of compound 4

4,6-dimethyl-2-(3-nitrophenyl)-1H-benzo[d]imidazole (5)

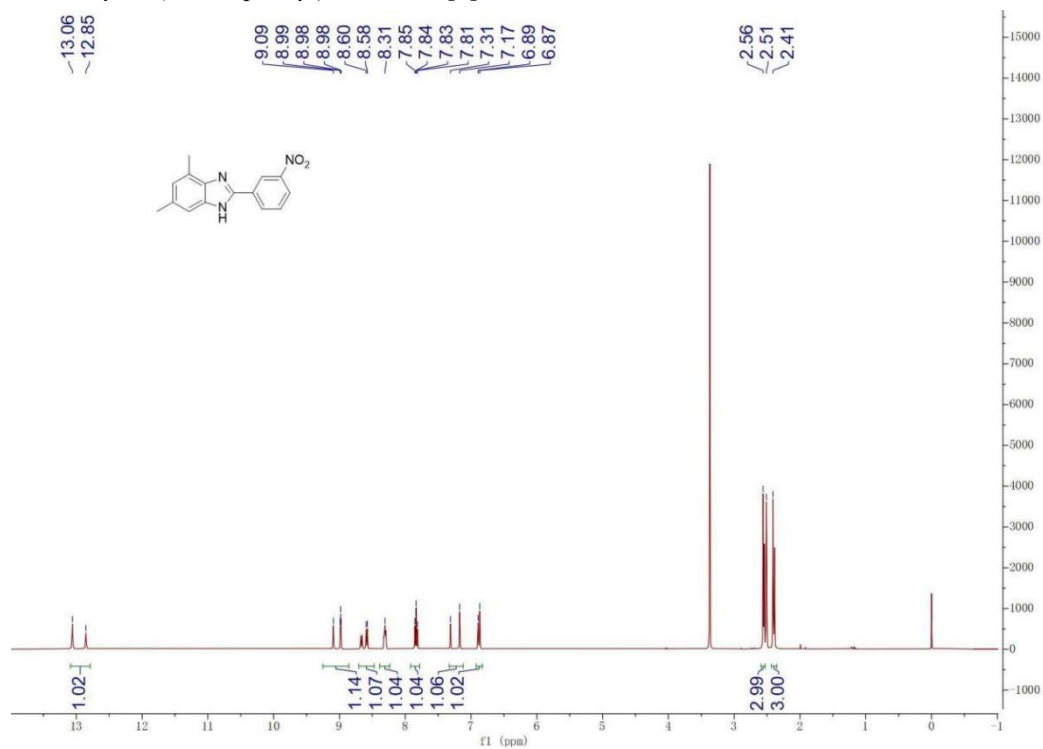

<sup>1</sup>H NMR of compound 5

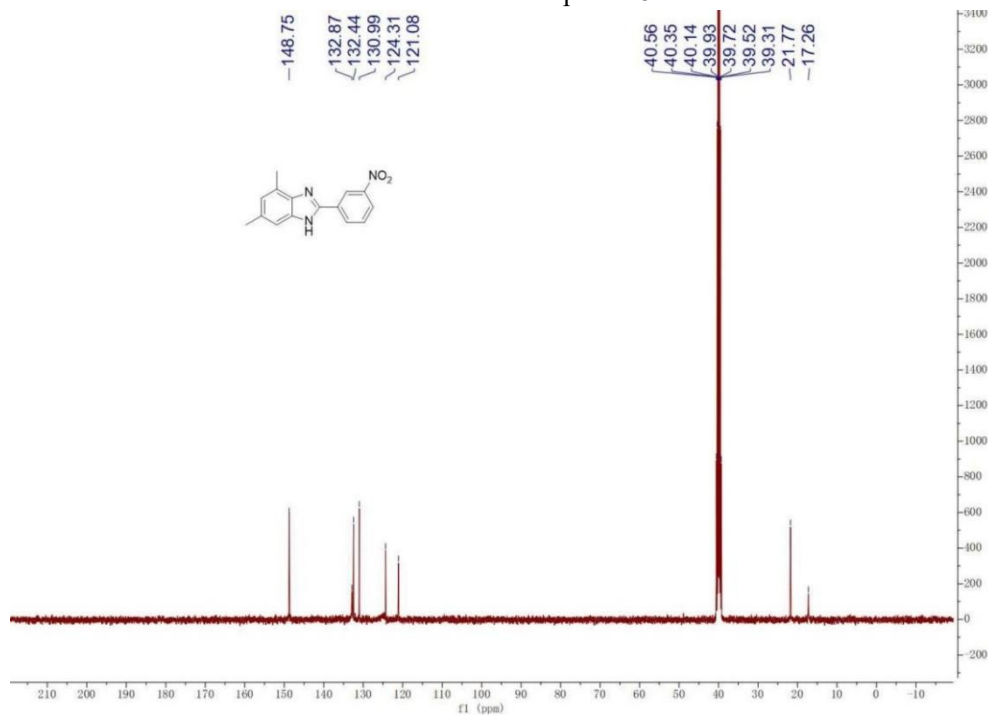

<sup>13</sup>C NMR of compound 5

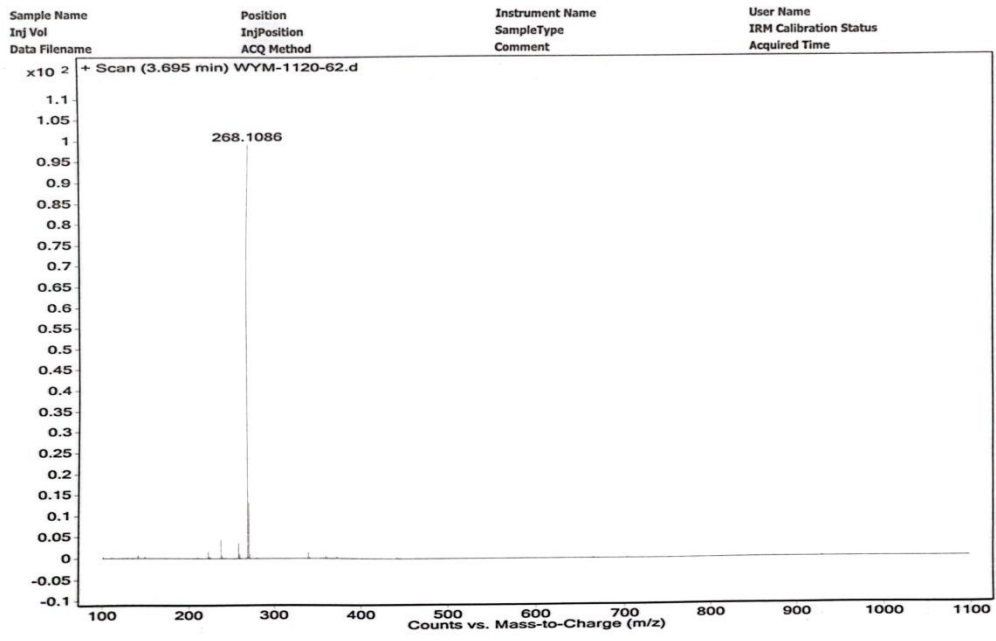

HR-MS of compound 5

methyl 4-(4,6-dimethyl-1H-benzo[d]imidazol-2-yl)benzoate (6)

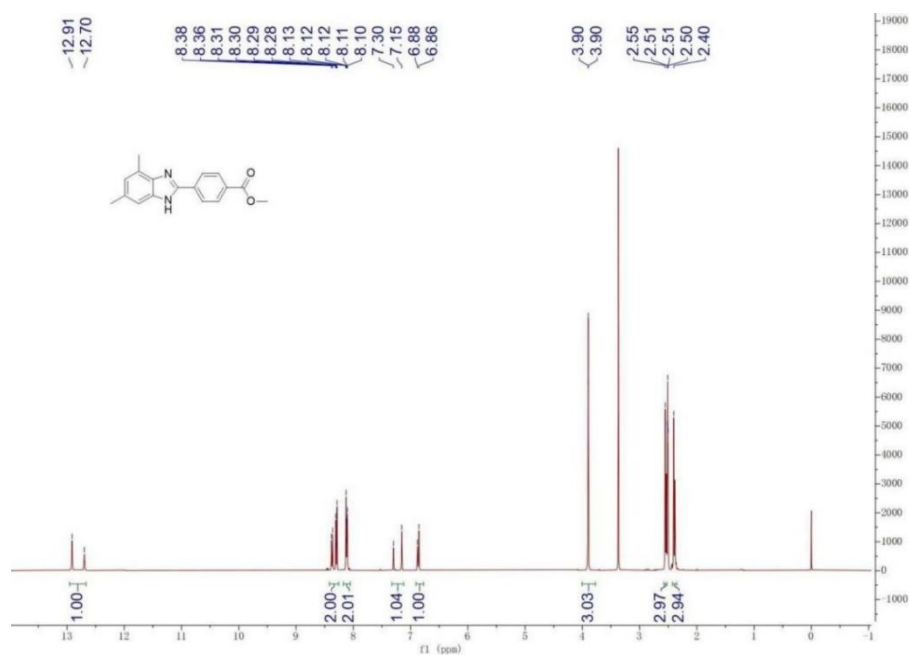

<sup>1</sup>H NMR of compound 6

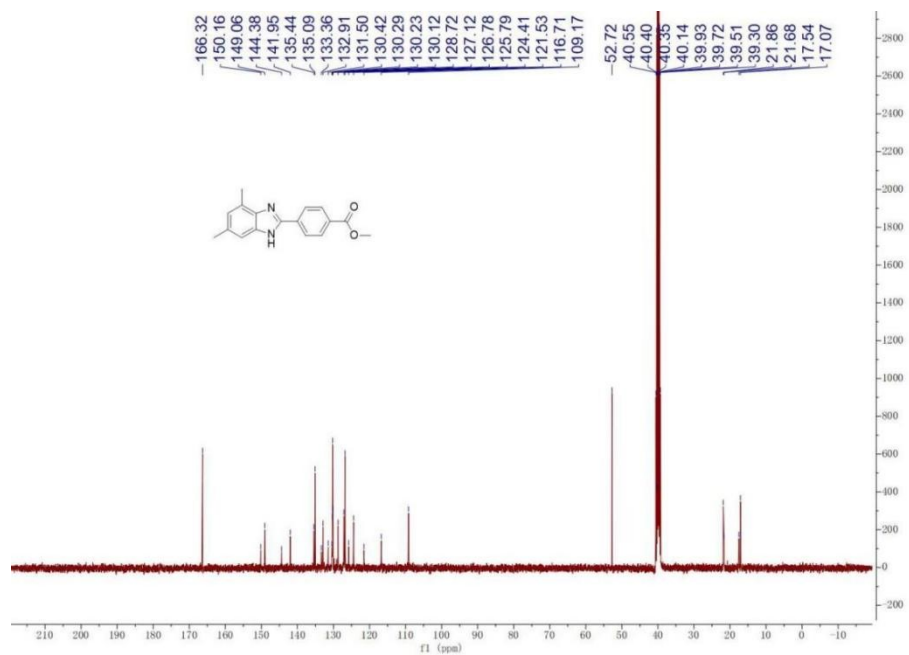

<sup>13</sup>C NMR of compound 6

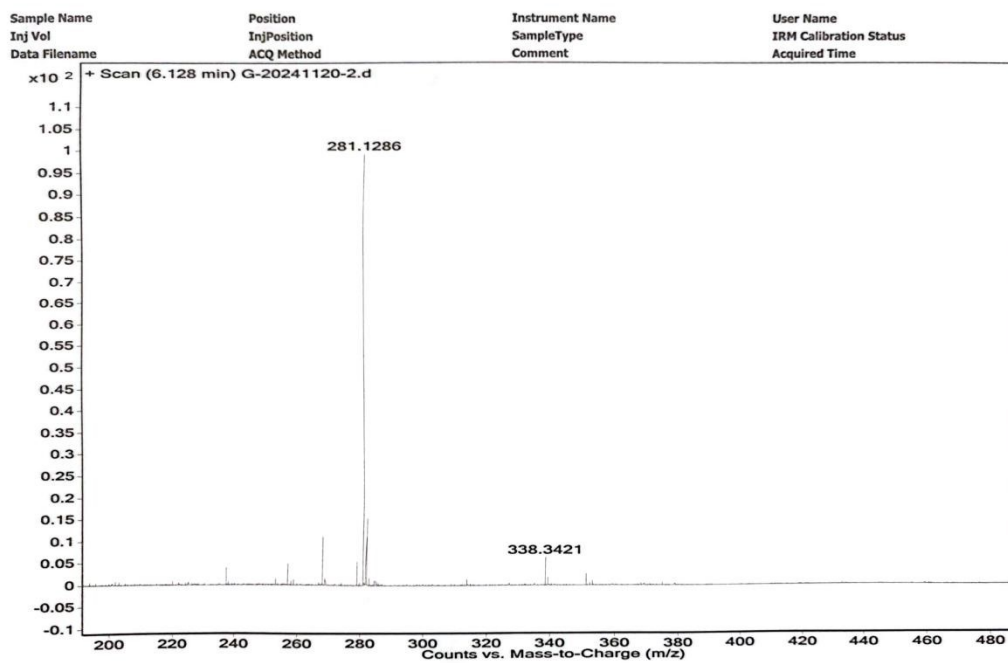

HR-MS of compound 6

methyl 2-(4-(4,6-dimethyl-1H-benzodimidazol-2-yl)phenyl)acetate (7)

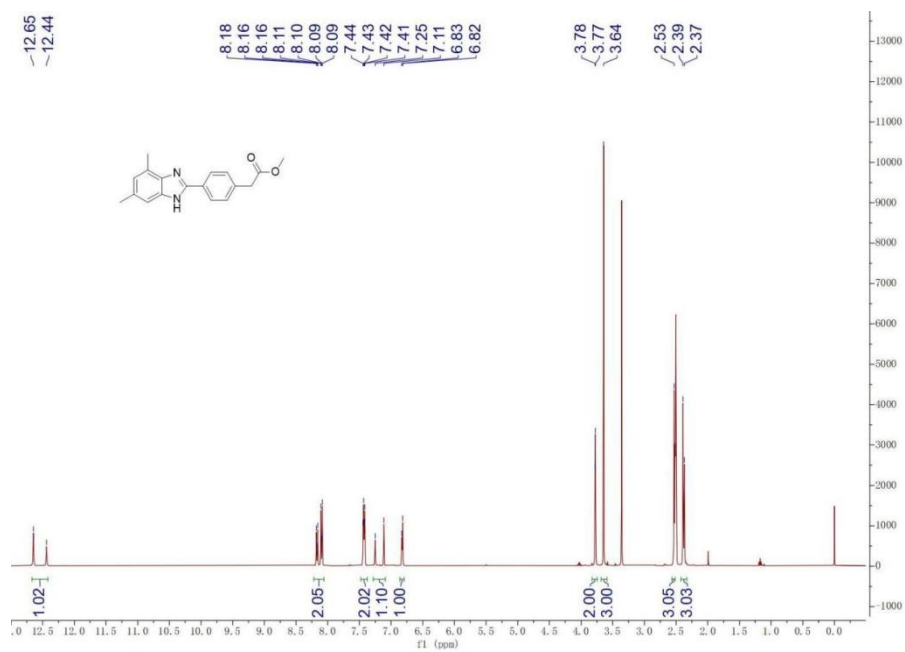

<sup>1</sup>H NMR of compound 7

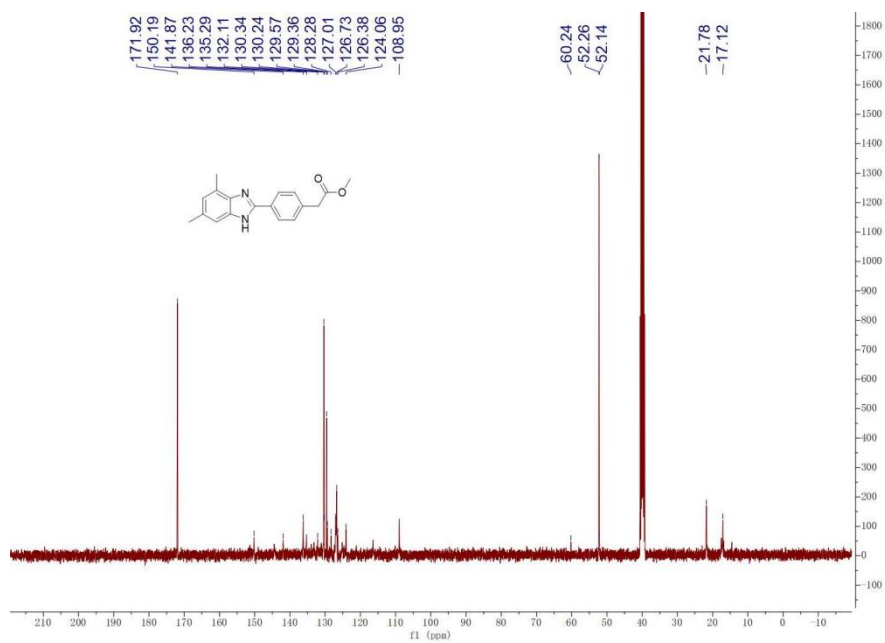

<sup>13</sup>C NMR of compound 7



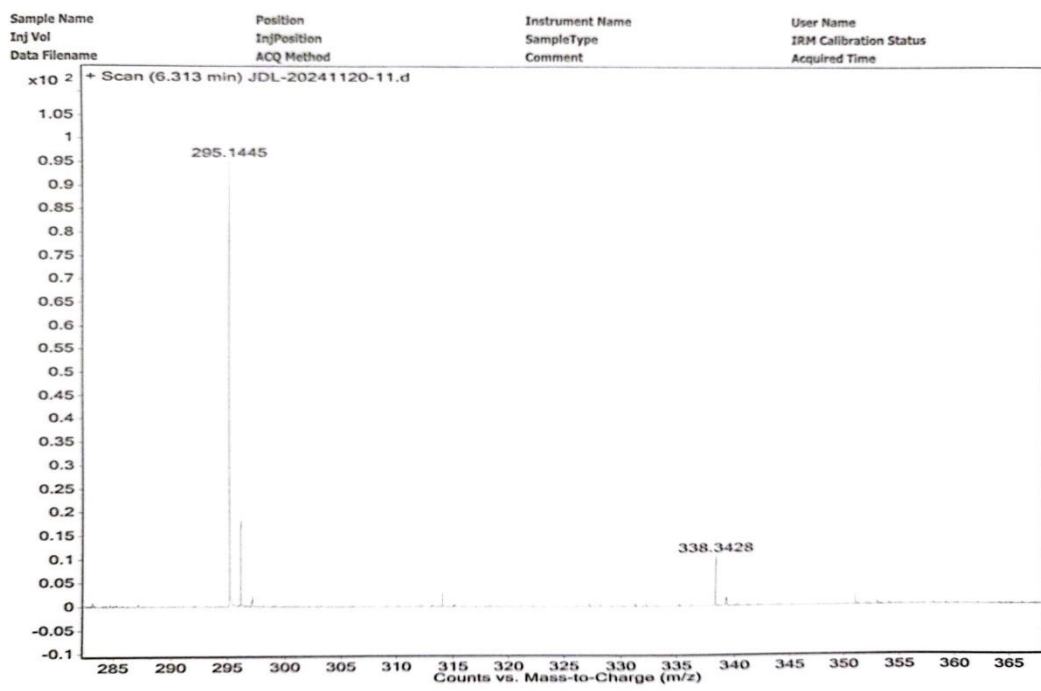

HR-MS of compound 7

1-(4-(4,6-dimethyl-1H-benzo[d]imidazol-2-yl)phenyl)-3-ethylurea (8)

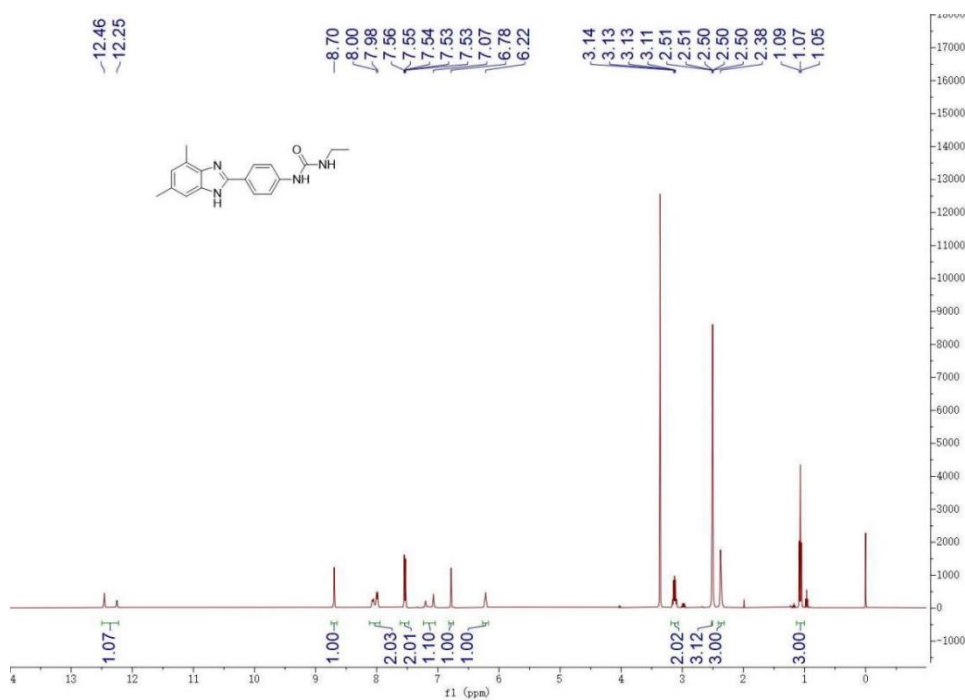

<sup>1</sup>H NMR of compound 8

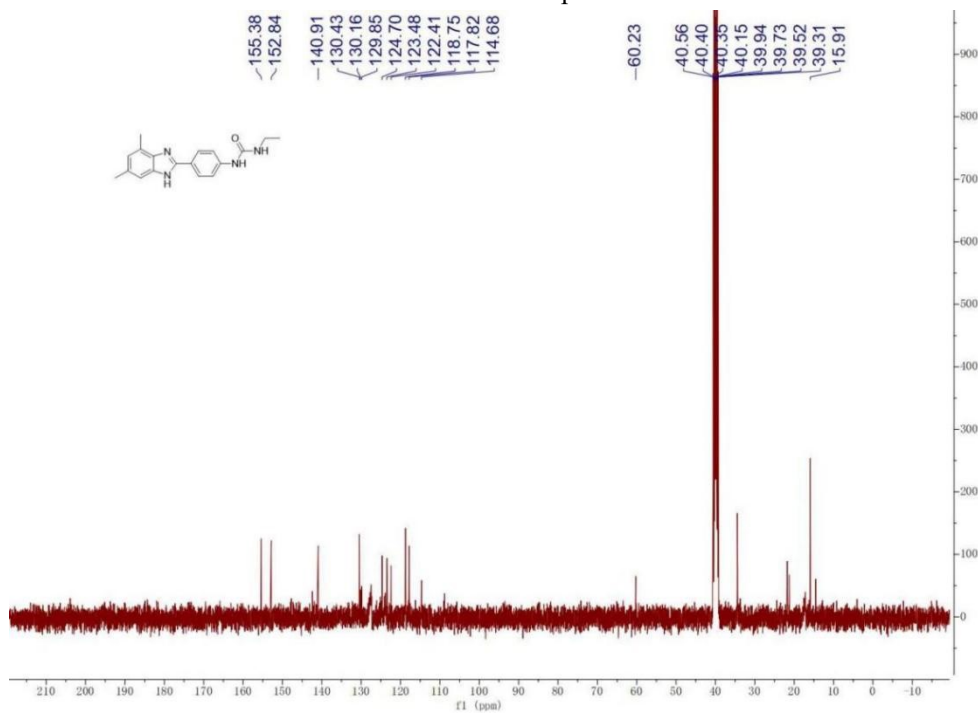

<sup>13</sup>C NMR of compound 8

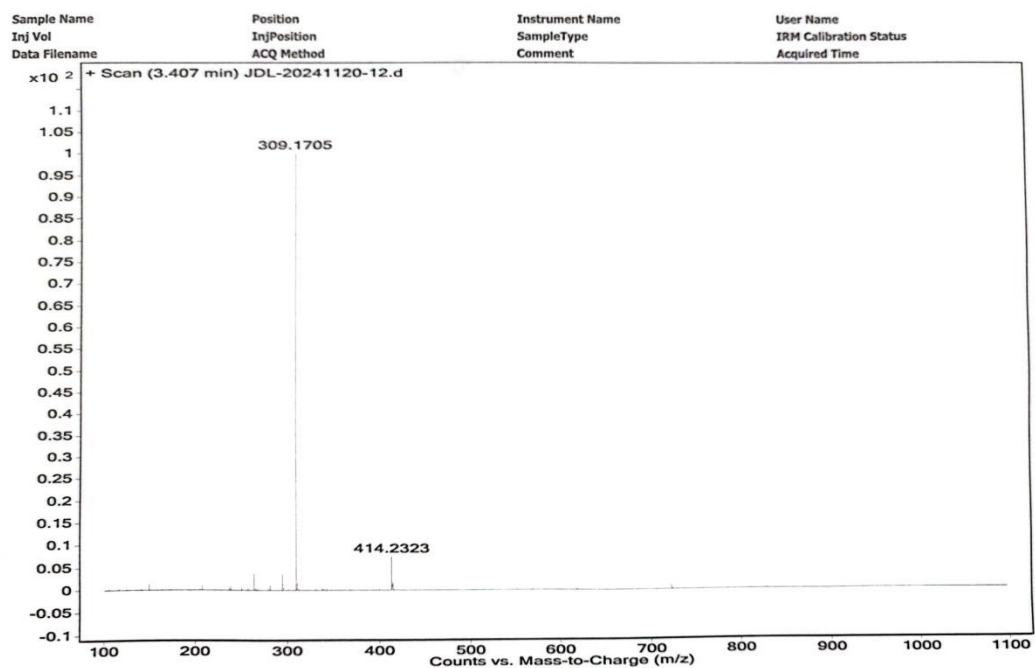

HR-MS of compound 8

1-butyl-3-(4-(4,6-dimethyl-1H-benzo[d]imidazol-2-yl)phenyl)urea (9)

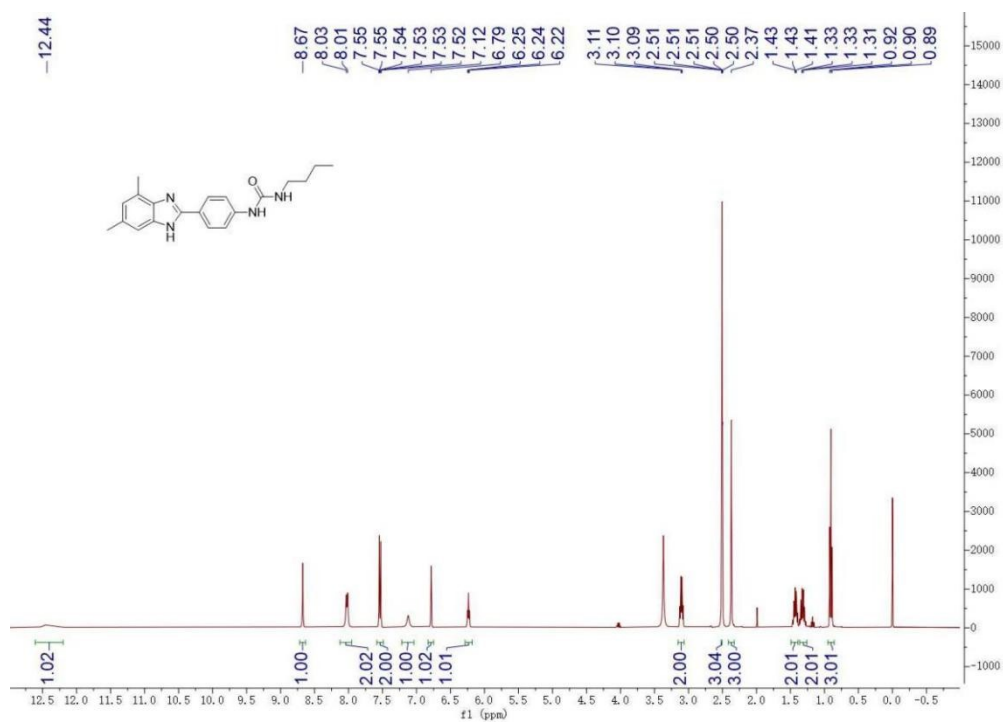

<sup>1</sup>H NMR of compound 9

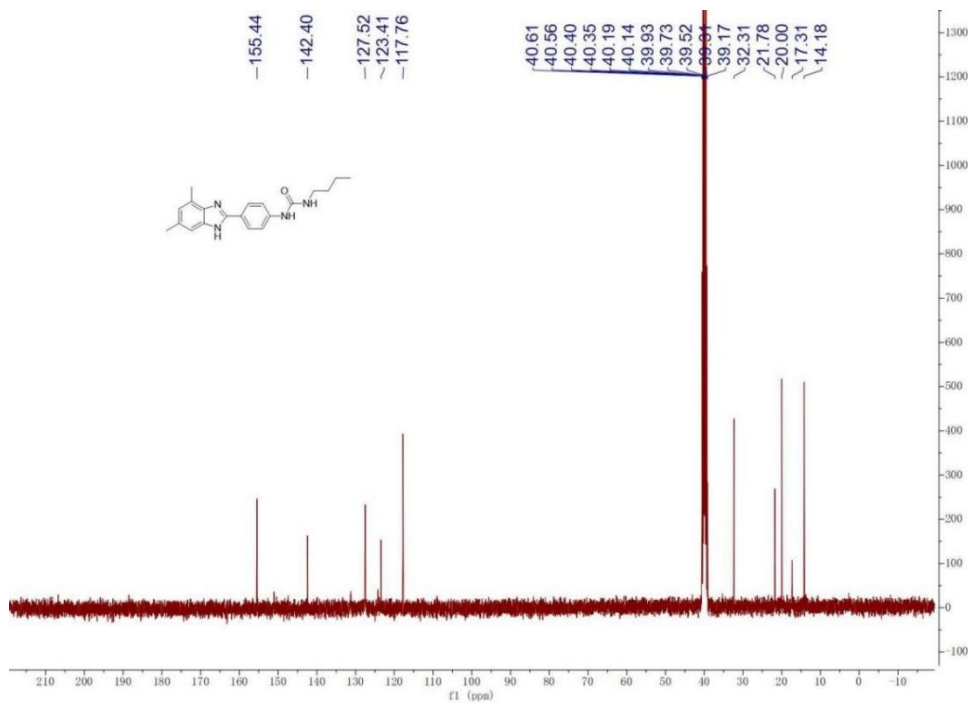

<sup>13</sup>C NMR of compound 9

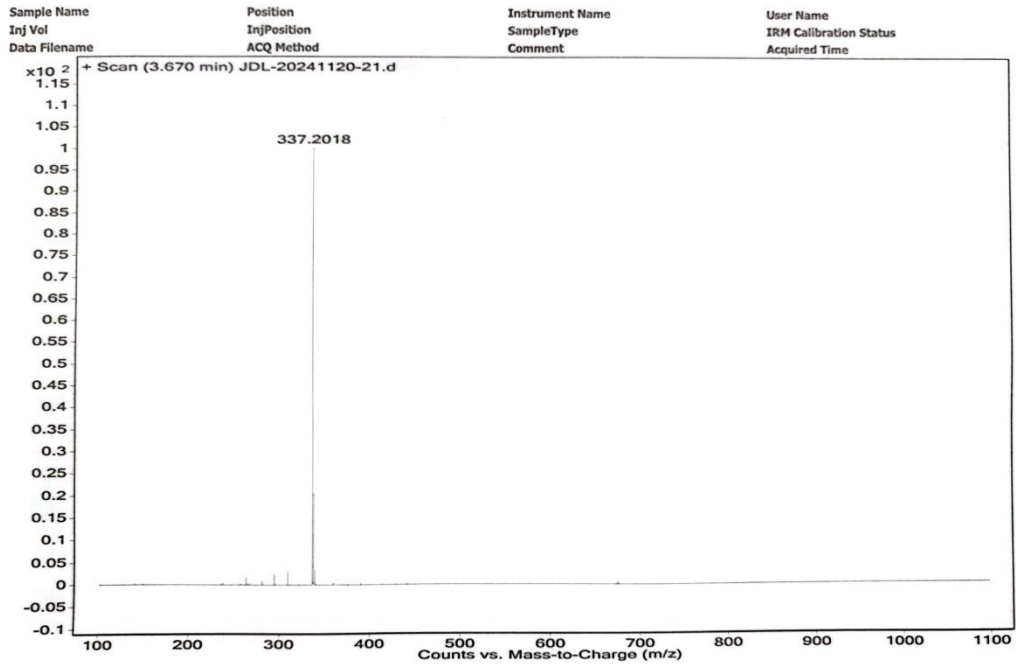

HR-MS of compound 9

1-(4-(4,6-dimethyl-1H-benzof[d]imidazol-2-yl)phenyl)-3-(p-tolyl)urea (10)

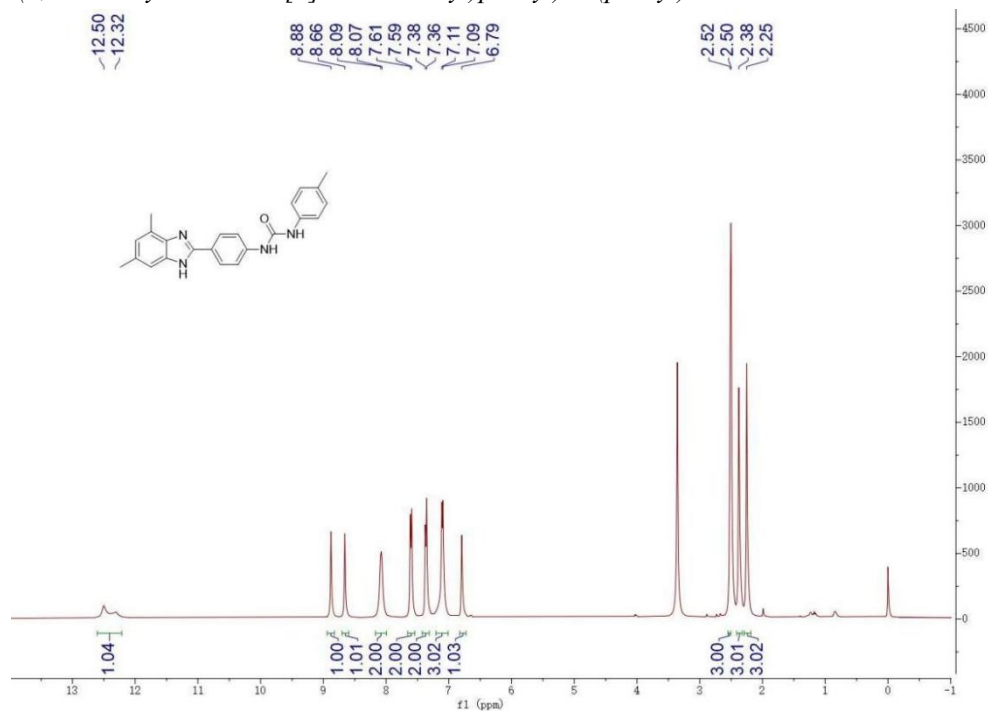

<sup>1</sup>H NMR of compound 10

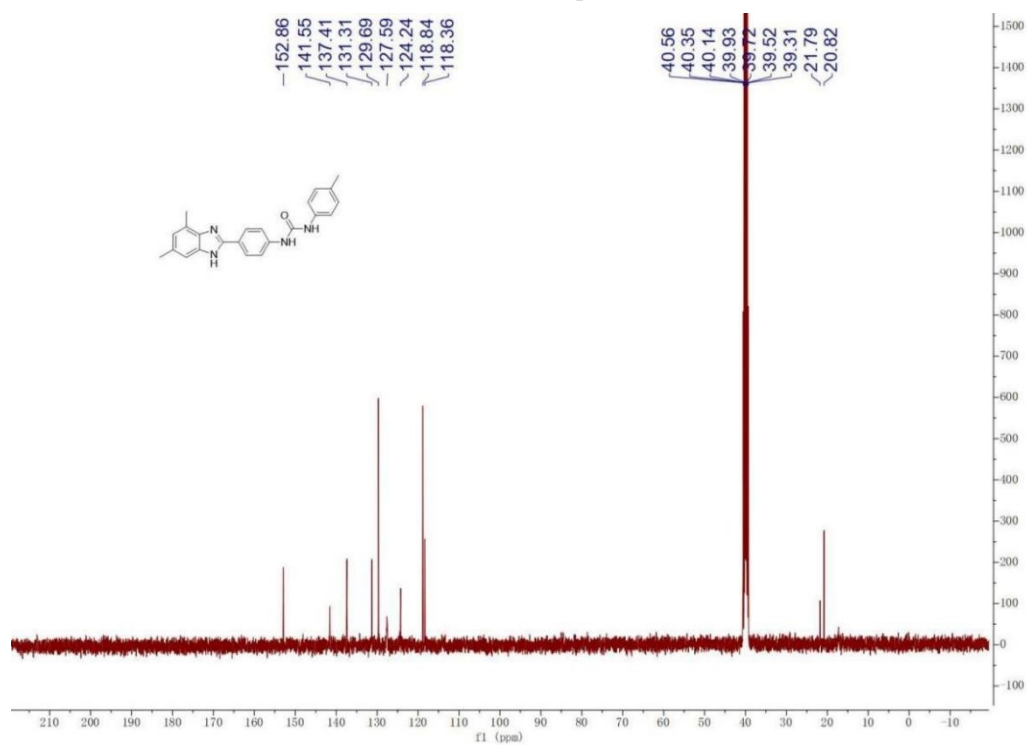

<sup>13</sup>C NMR of compound 10

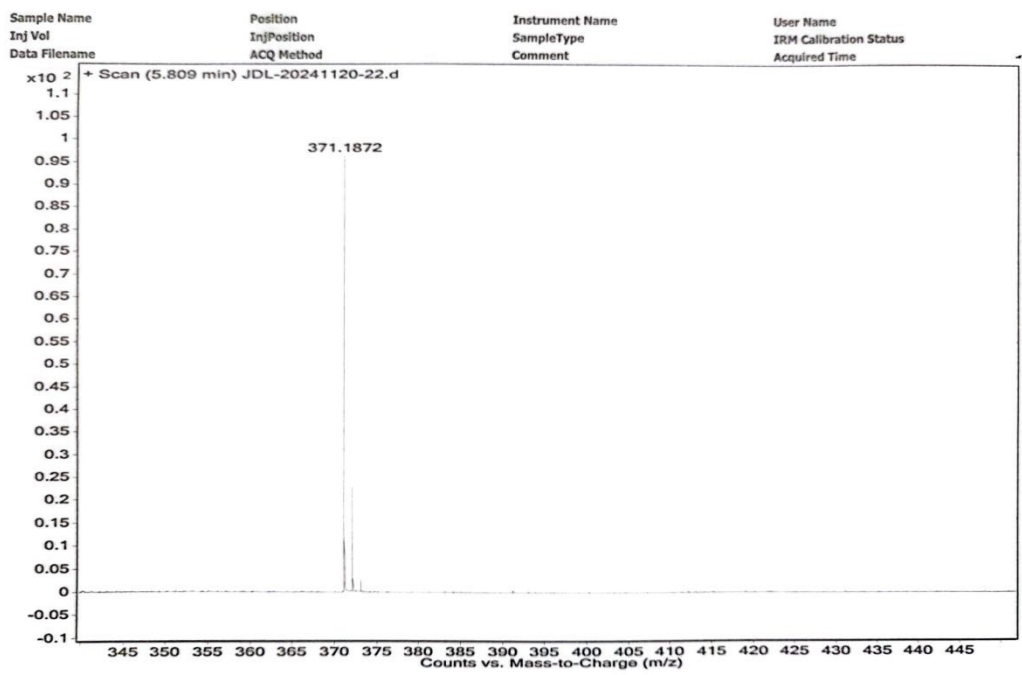

HR-MS of compound 10

1-(4-chlorophenyl)-3-(4-(4,6-dimethyl-1H-benzof[d]imidazol-2-yl)phenyl)urea (**11**)

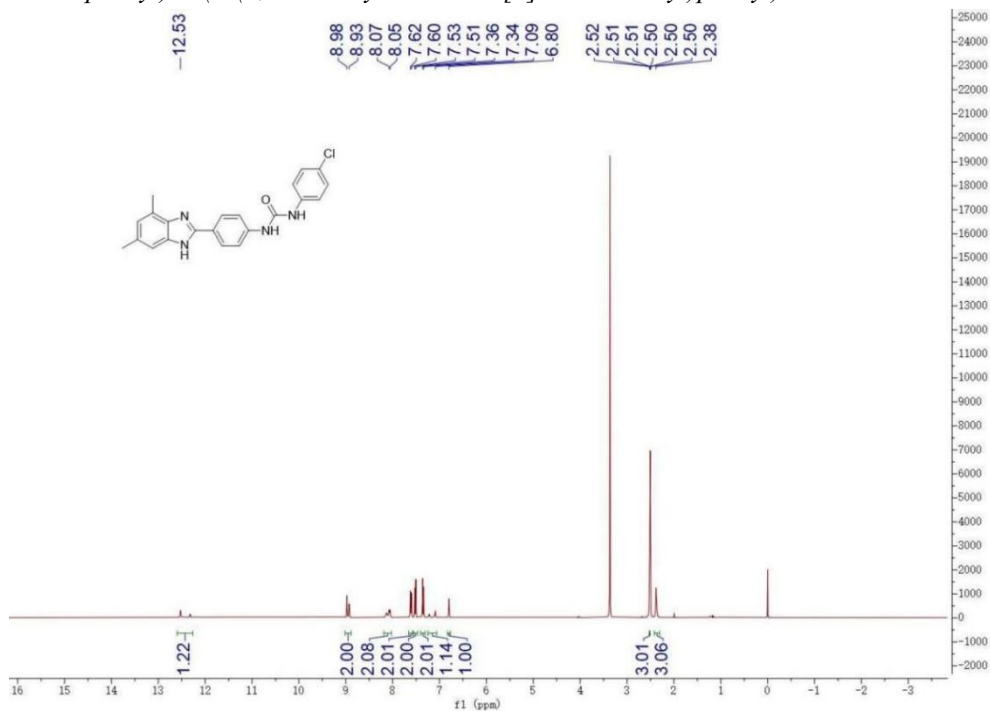

<sup>1</sup>H NMR of compound **11**

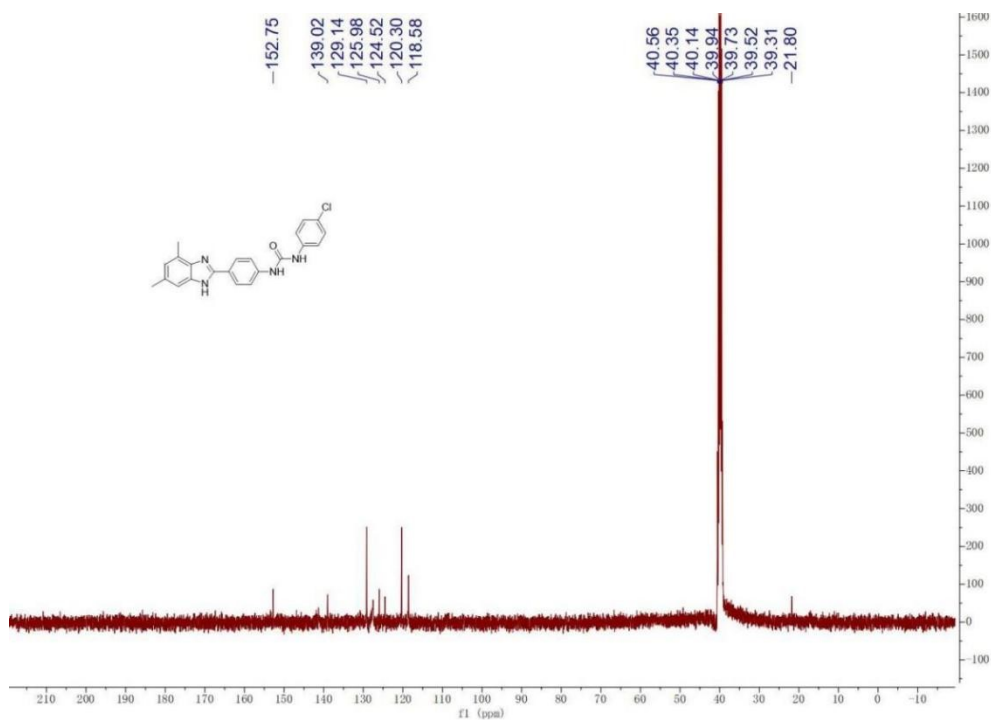

<sup>13</sup>C NMR of compound **11**



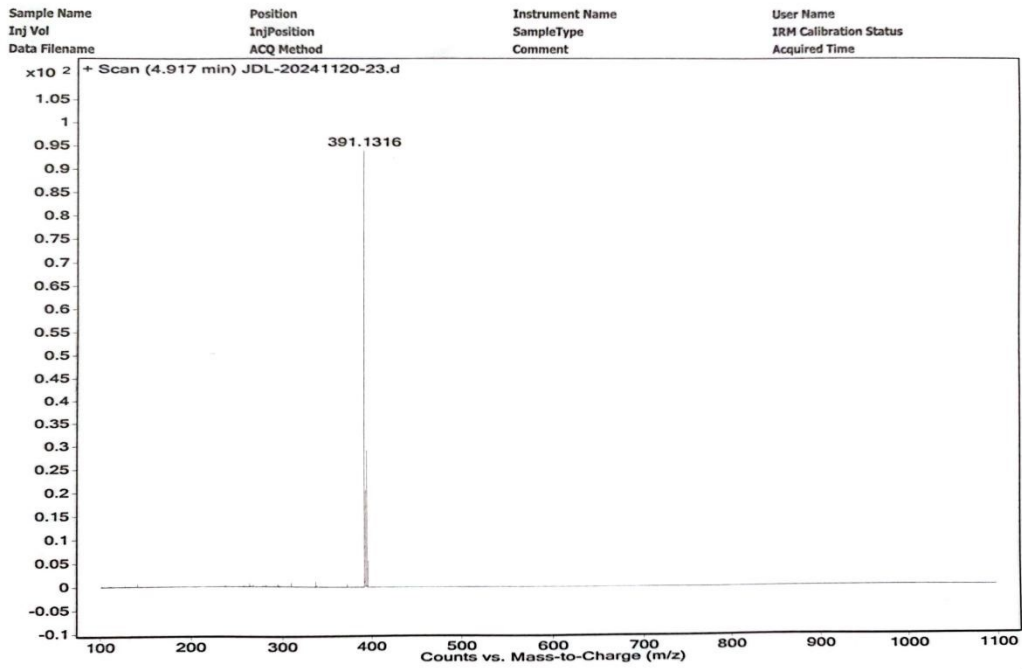

HR-MS of compound 11

1-(4-bromophenyl)-3-(4-(4,6-dimethyl-1H-benzo[d]imidazol-2-yl)phenyl)urea (12)

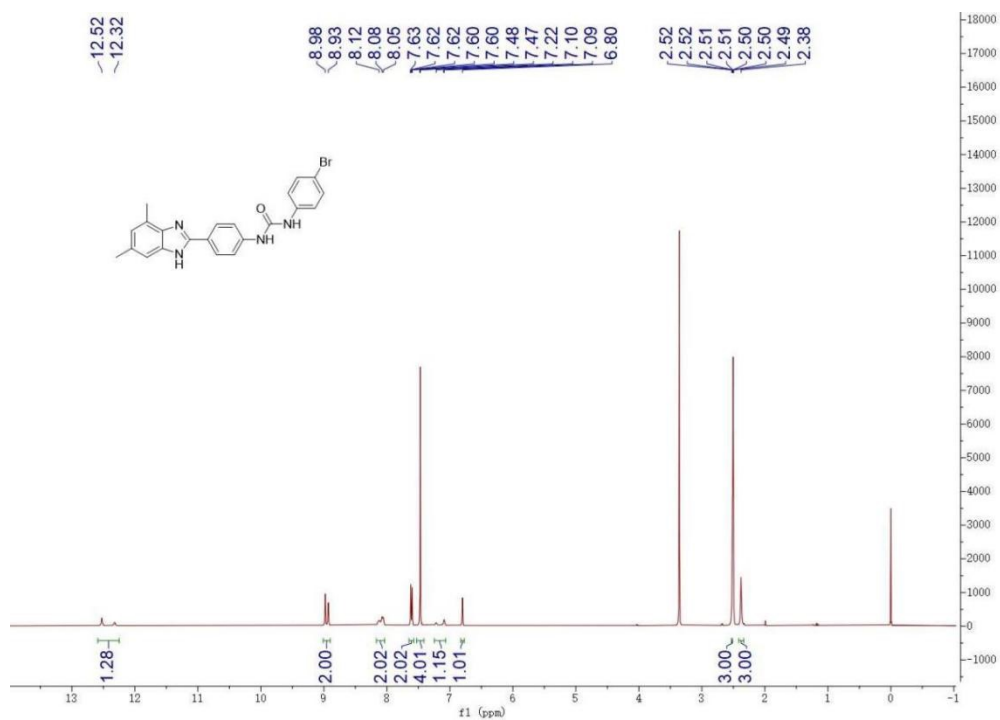

<sup>1</sup>H NMR of compound 12

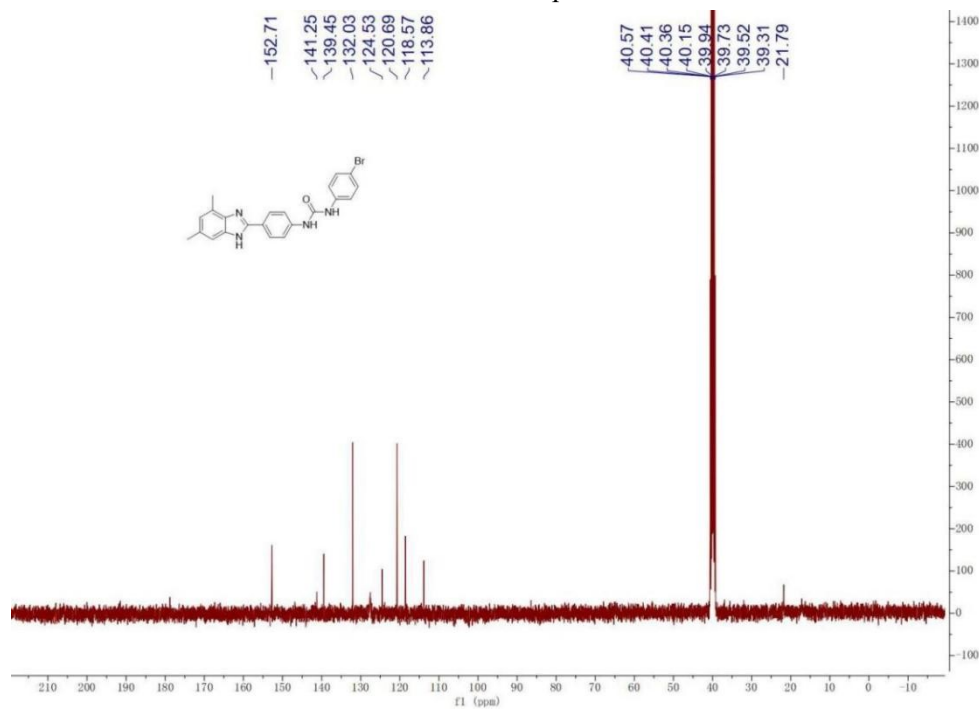

<sup>13</sup>C NMR of compound 12

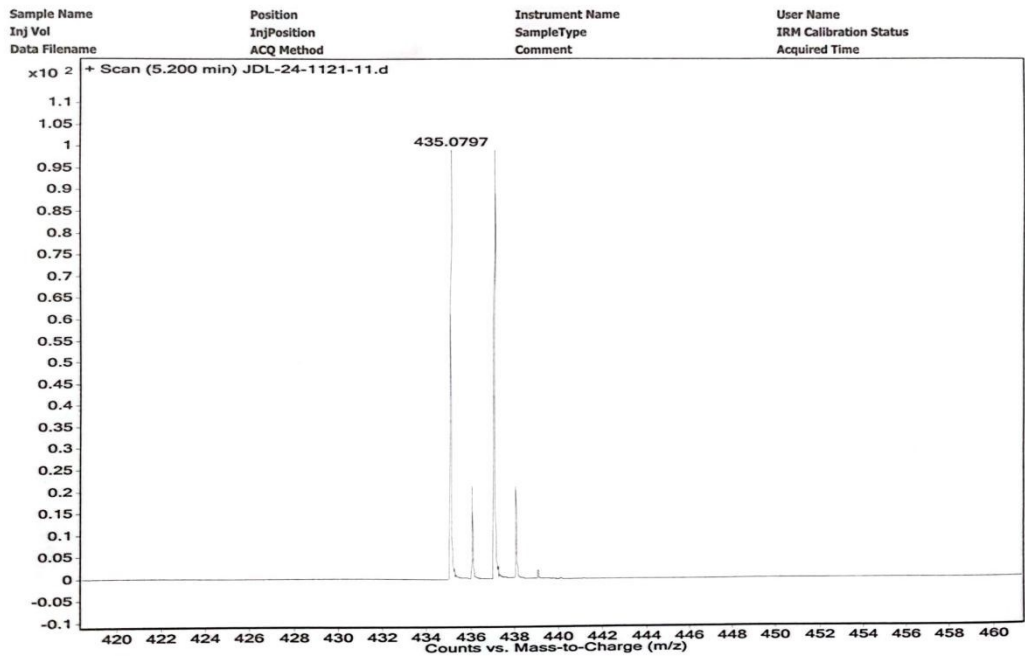

HR-MS of compound 12

1-(4-(4,6-dimethyl-1H-benzof[d]imidazol-2-yl)phenyl)-3-(4-methoxyphenyl)urea (13)

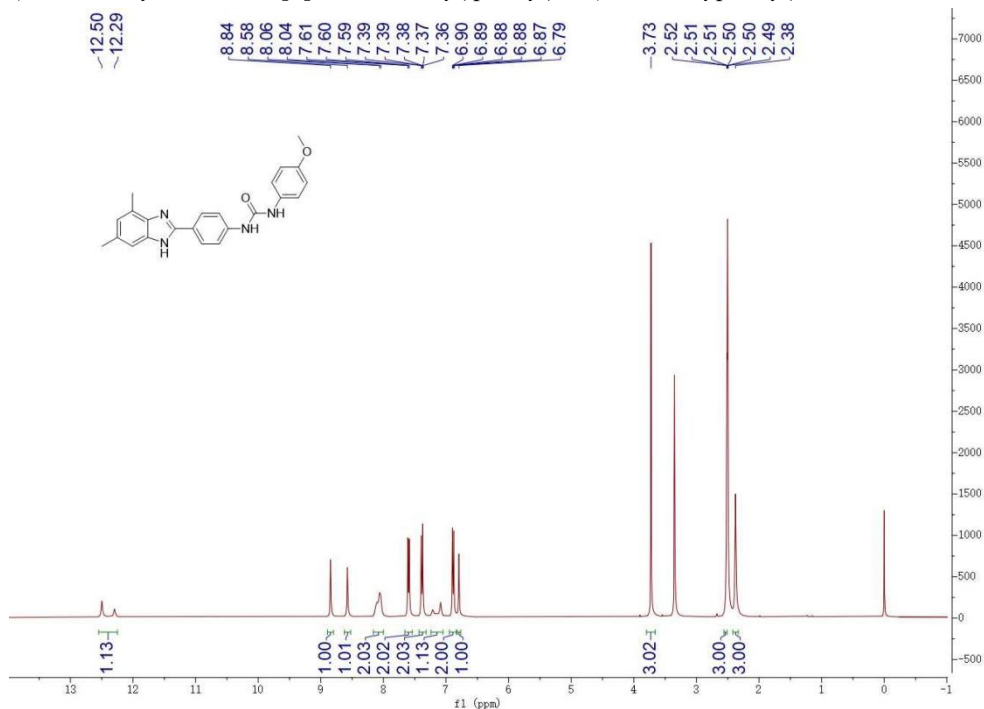

<sup>1</sup>H NMR of compound 13

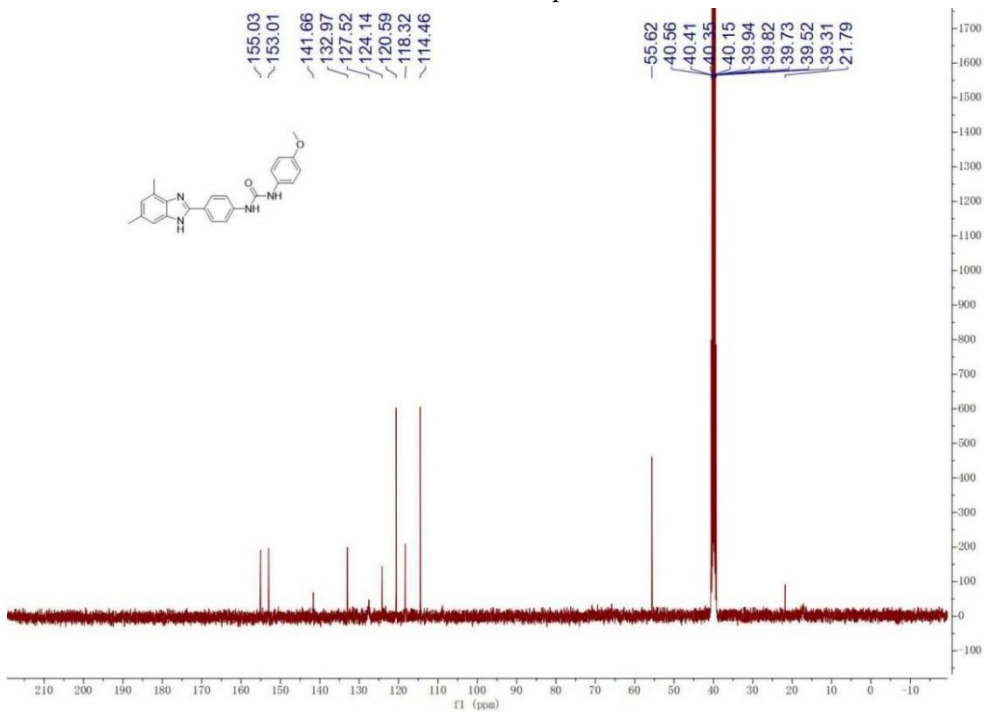

<sup>13</sup>C NMR of compound 13

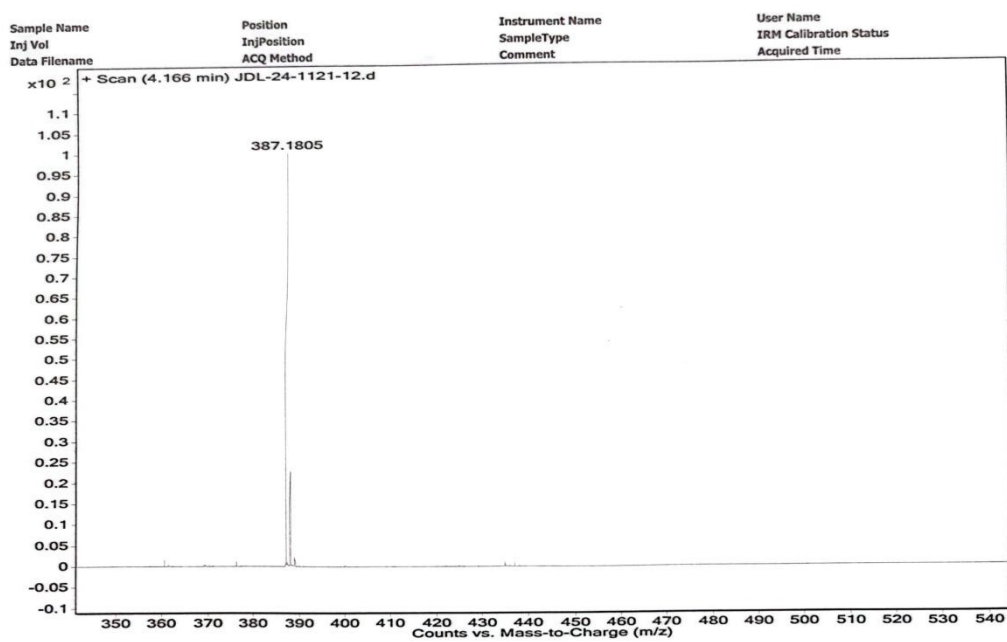

HR-MS of compound 13

1-(4-(4,6-dimethyl-1H-benzo[d]imidazol-2-yl)phenyl)-3-(4-(trifluoromethoxy)phenyl)urea (**14**)

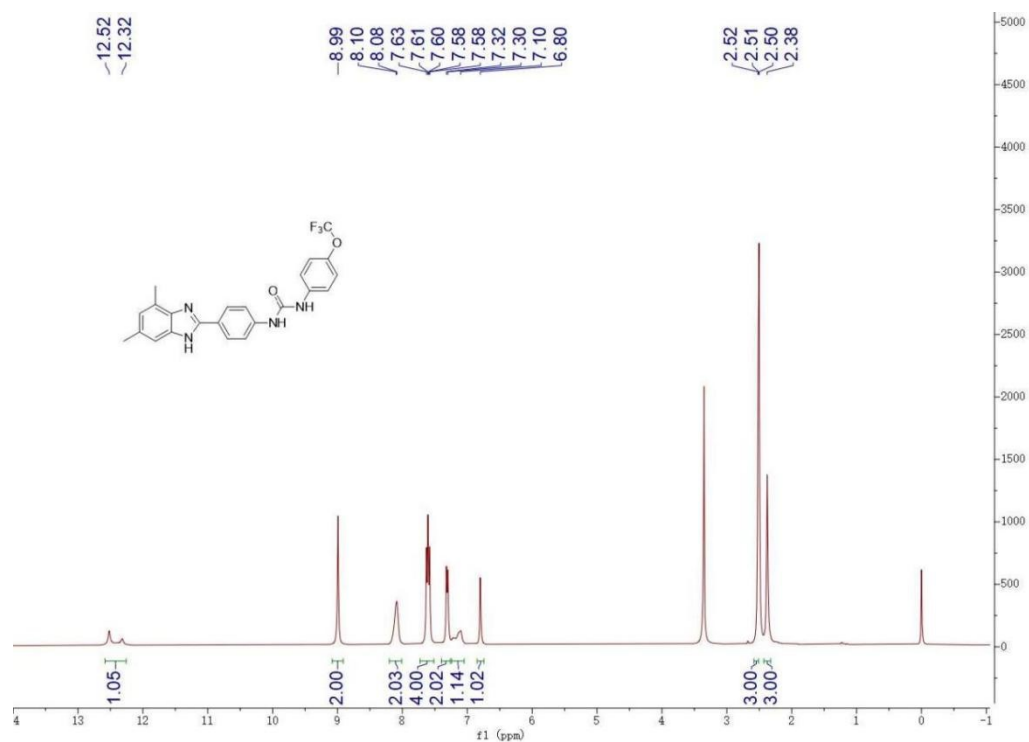

<sup>1</sup>H NMR of compound 14

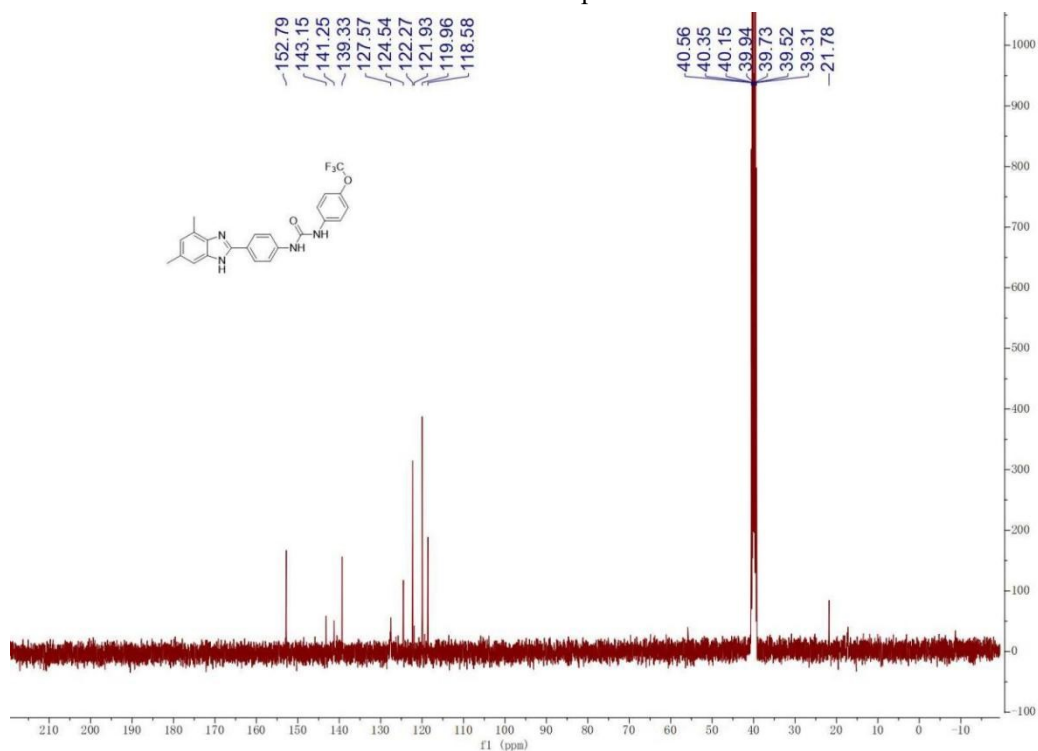

<sup>13</sup>C NMR of compound 14

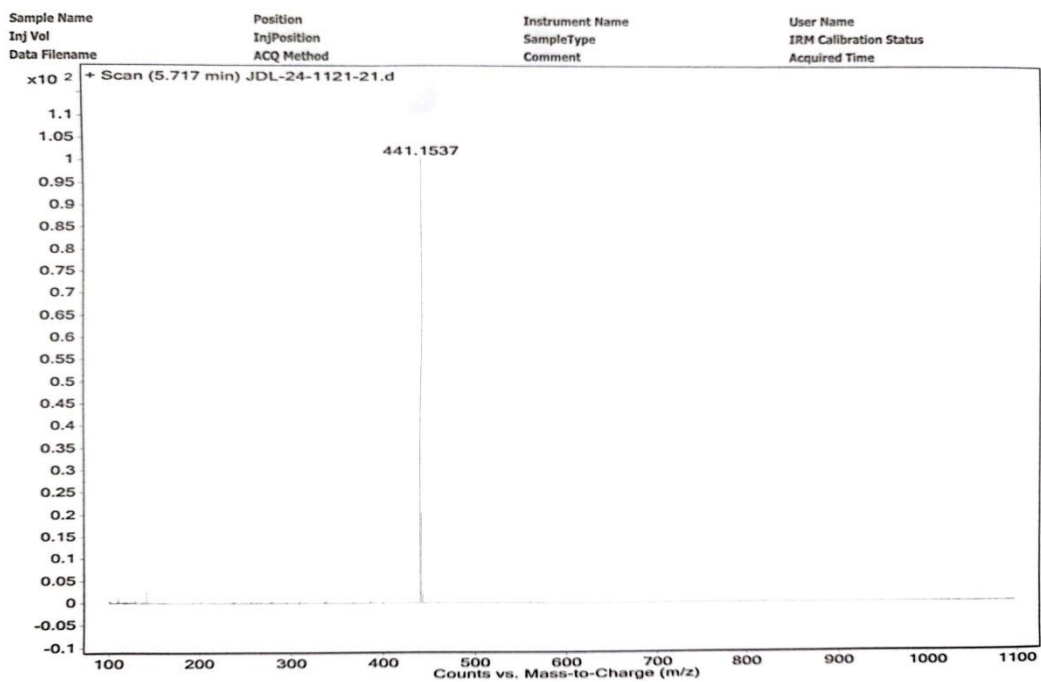

HR-MS of compound 14

*1-(4-chloro-3-(trifluoromethyl)phenyl)-3-(4-(4,6-dimethyl-1H-benzo[d]imidazol-2-yl)phenyl)urea (15)*

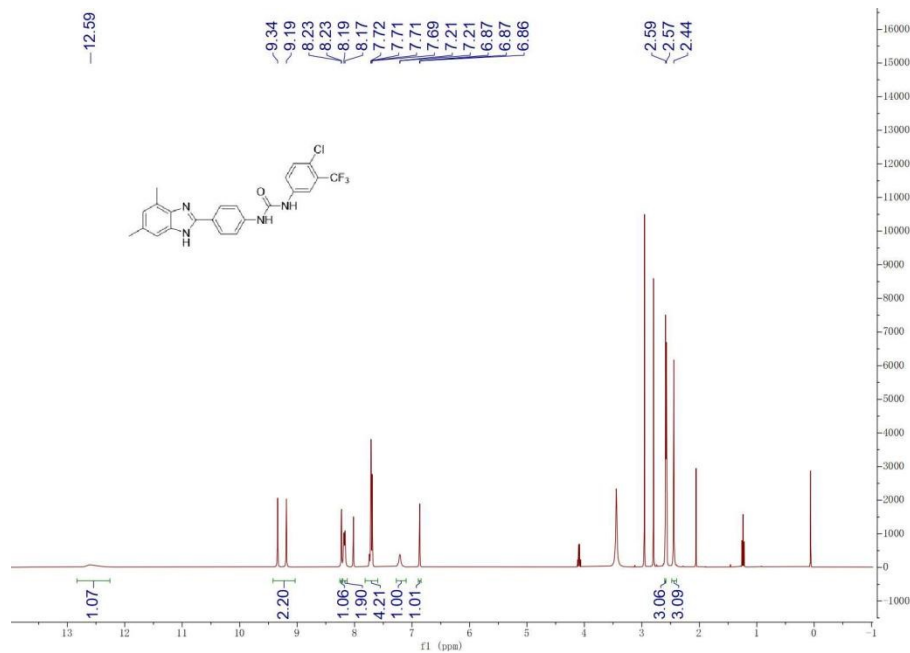

<sup>1</sup>H NMR of compound 15

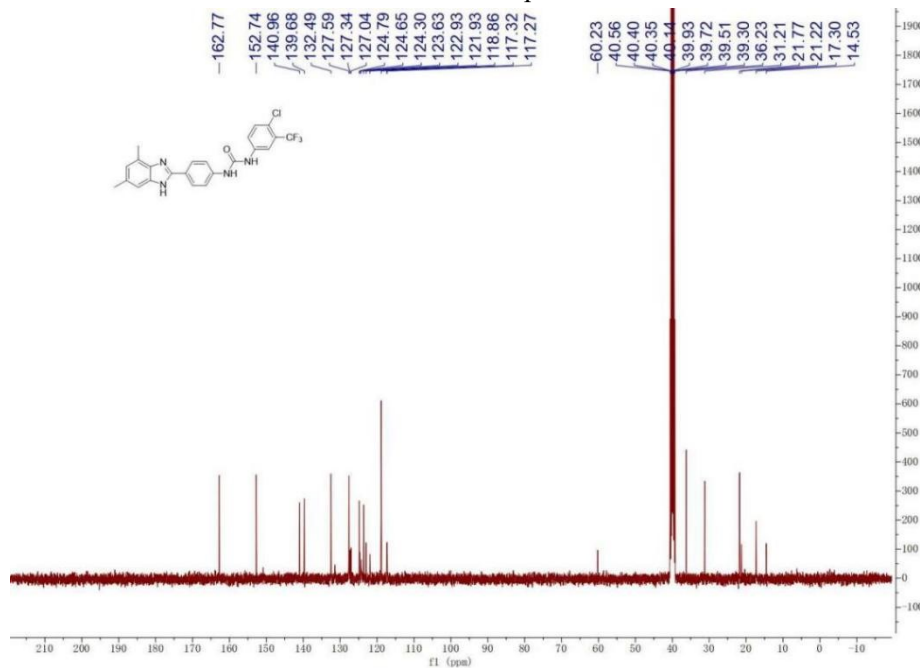

<sup>13</sup>C NMR of compound 15



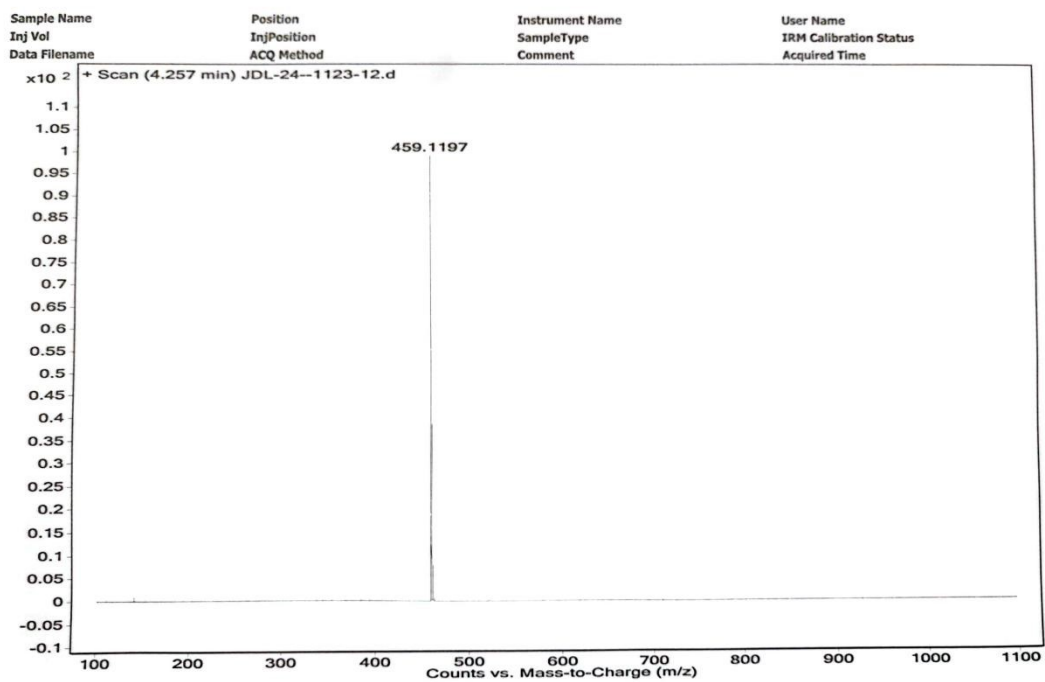

HR-MS of compound 15

1-(4-(4,6-dimethyl-1H-benzodimidazol-2-yl)phenyl)-3-(3-(trifluoromethyl)phenyl)urea (16)

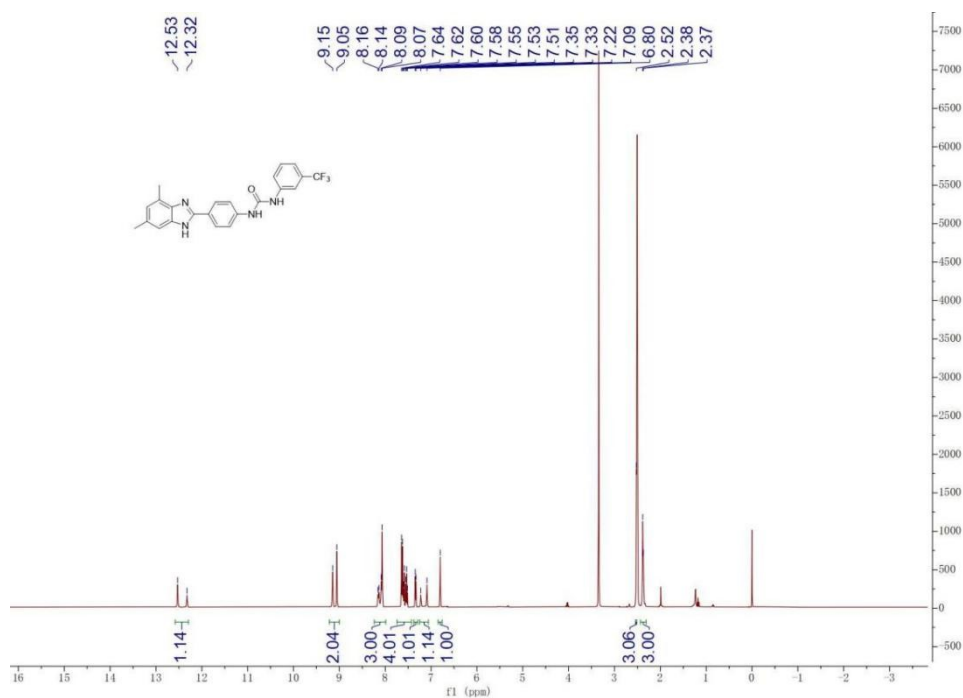

<sup>1</sup>H NMR of compound 16

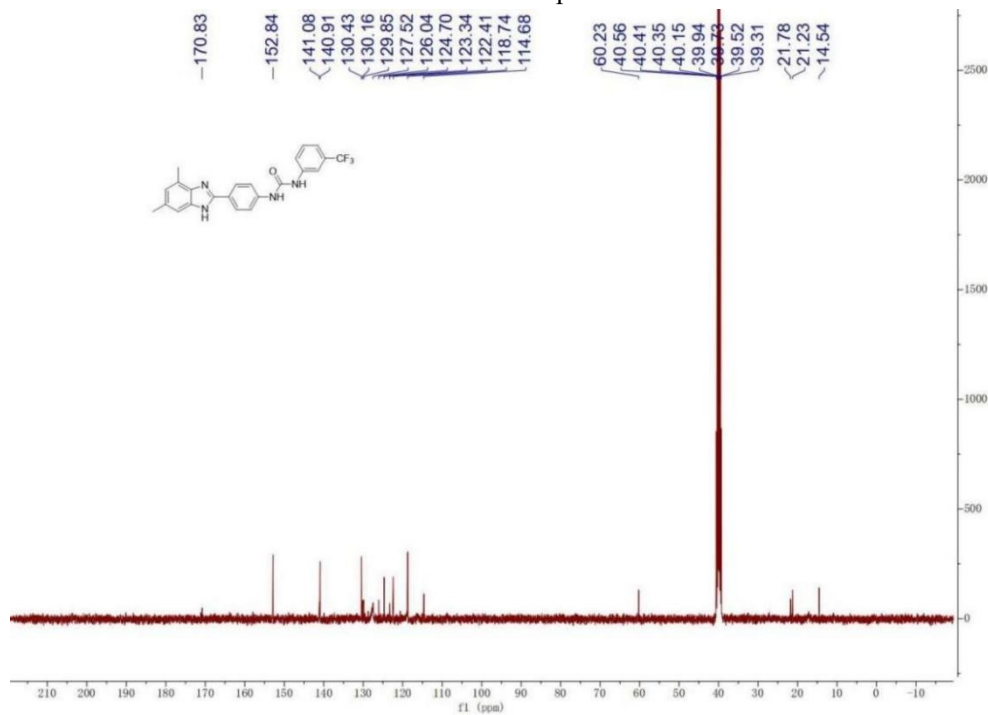

<sup>13</sup>C NMR of compound 16

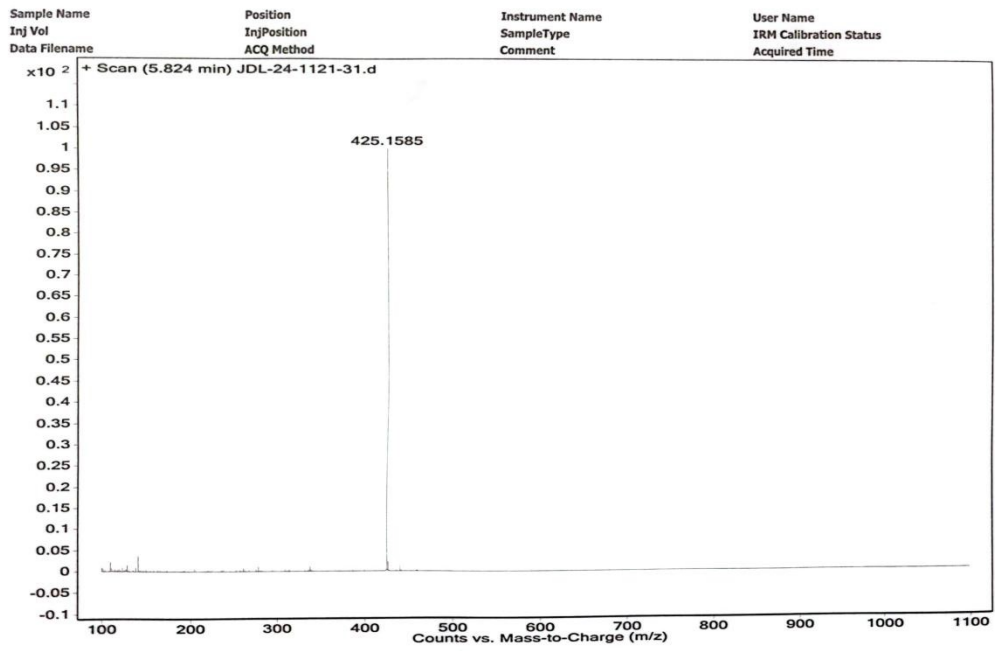

HR-MS of compound 16

*N*-(4-(4,6-dimethyl-1*H*-benzo[d]imidazol-2-yl)phenyl)benzamide (**17**)

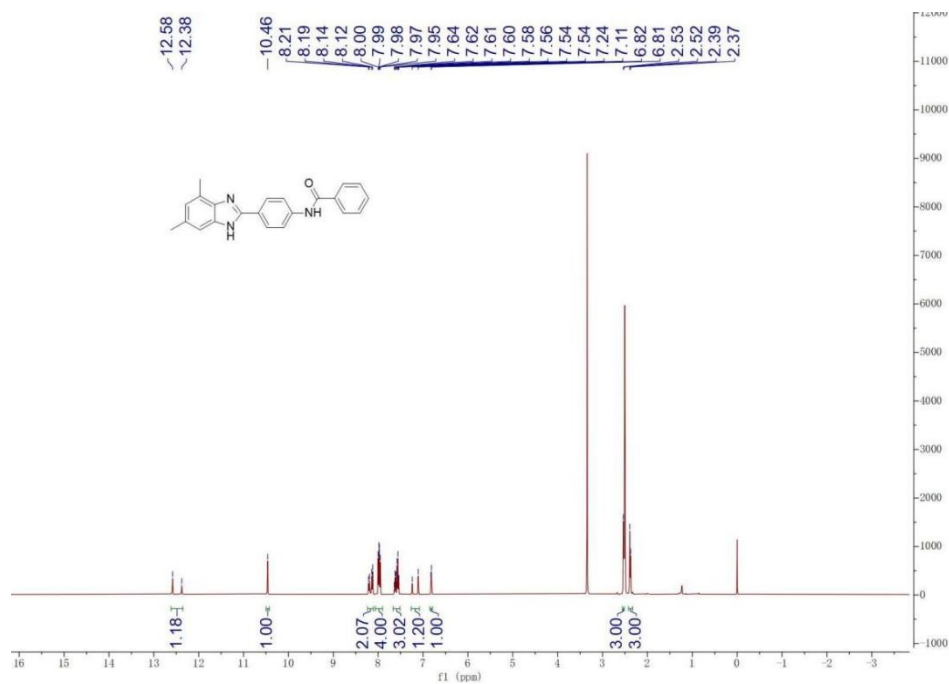

<sup>1</sup>H NMR of compound **17**

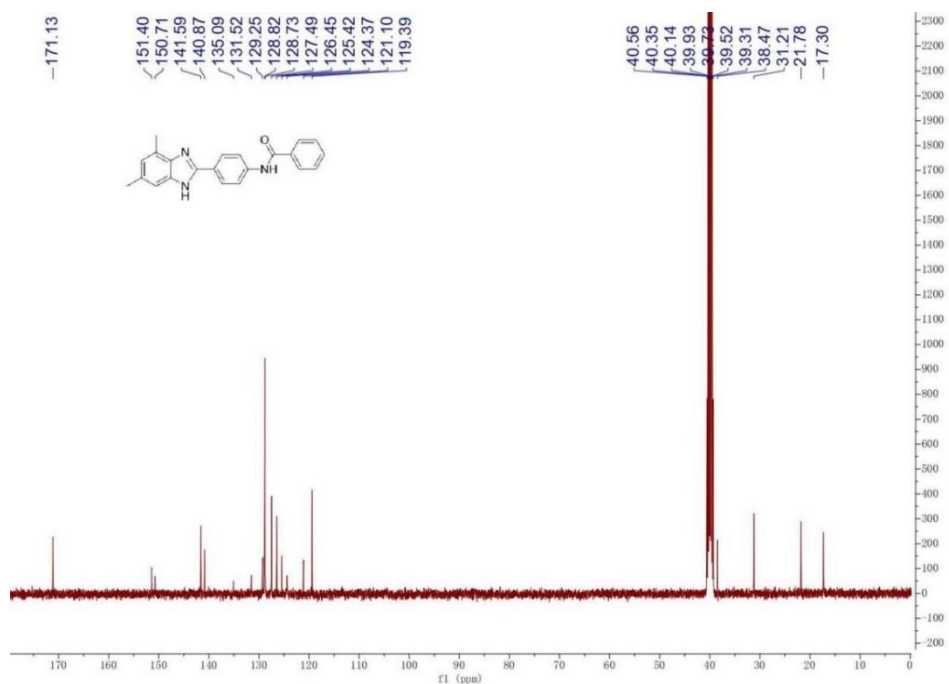

<sup>13</sup>C NMR of compound **17**

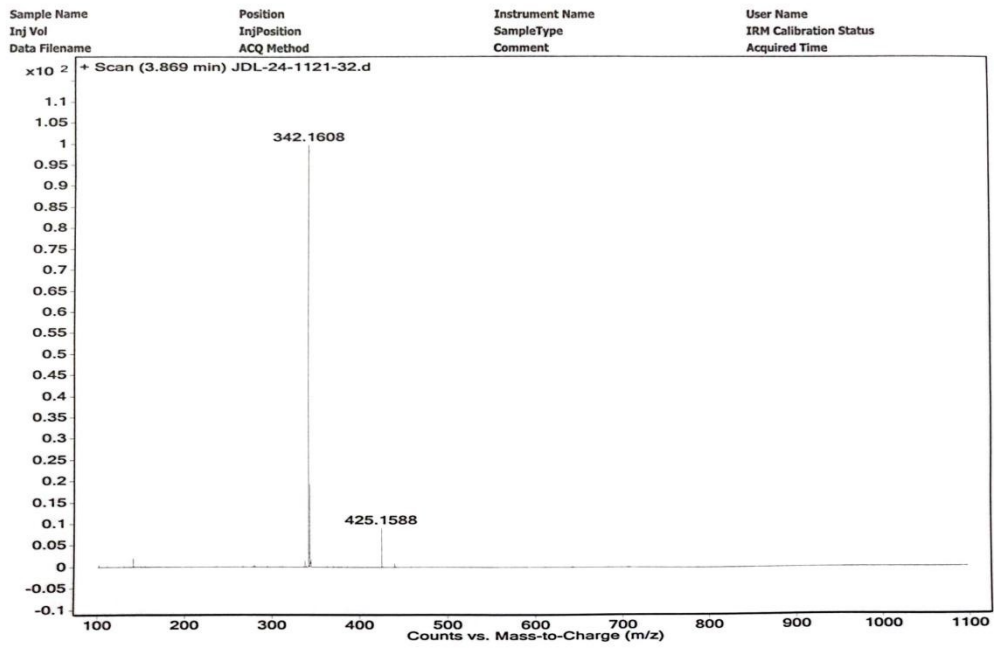

HR-MS of compound 17

*N*-(4-(4,6-dimethyl-1*H*-benzo[d]imidazol-2-yl)phenyl)-2-phenylacetamide (**18**)

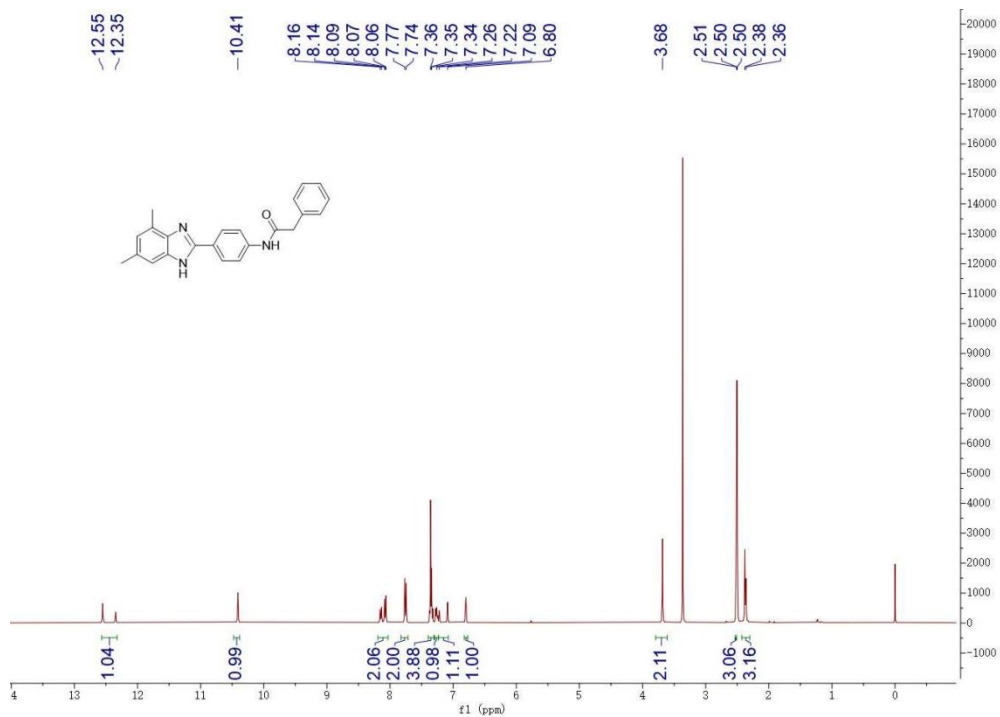

<sup>1</sup>H NMR of compound 18

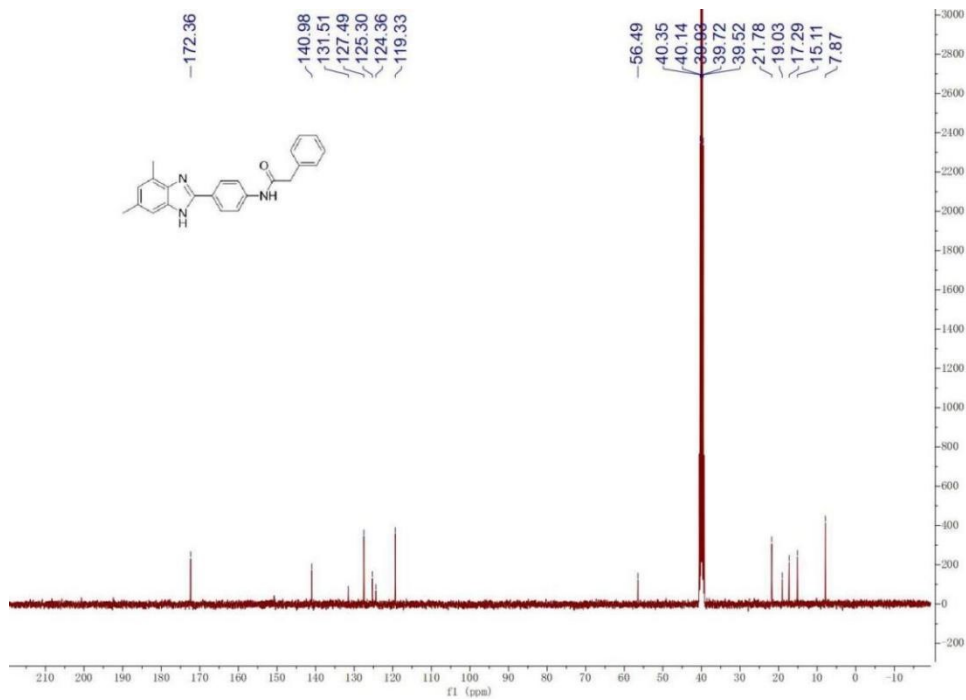

<sup>13</sup>C NMR of compound 18

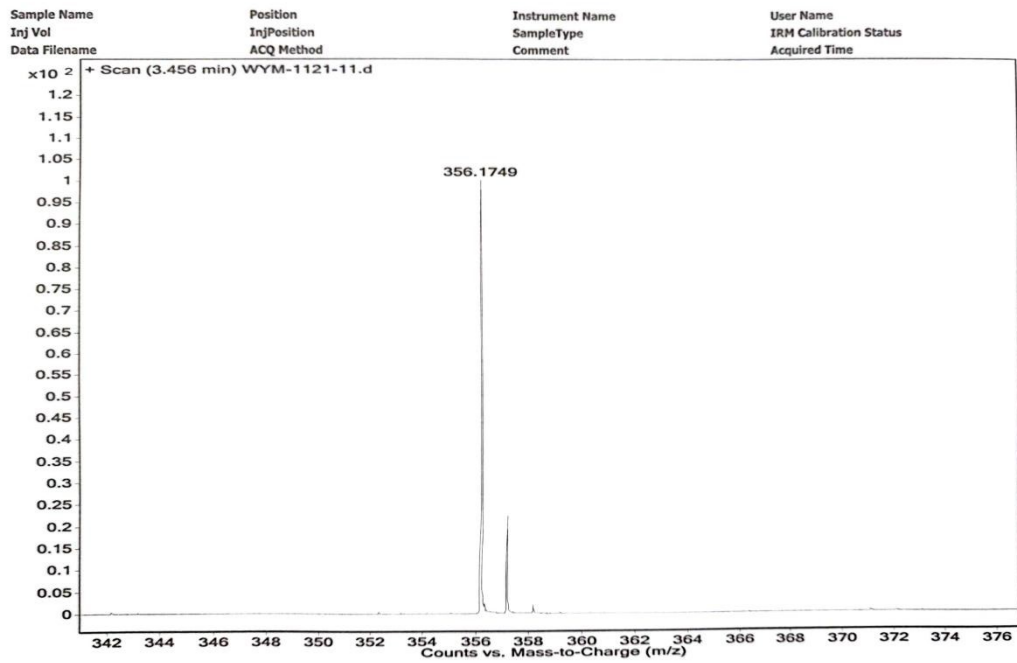

HR-MS of compound 18

N-(4-(4,6-dimethyl-1H-benzo[d]imidazol-2-yl)phenyl)-3-phenylpropanamide (**19**)

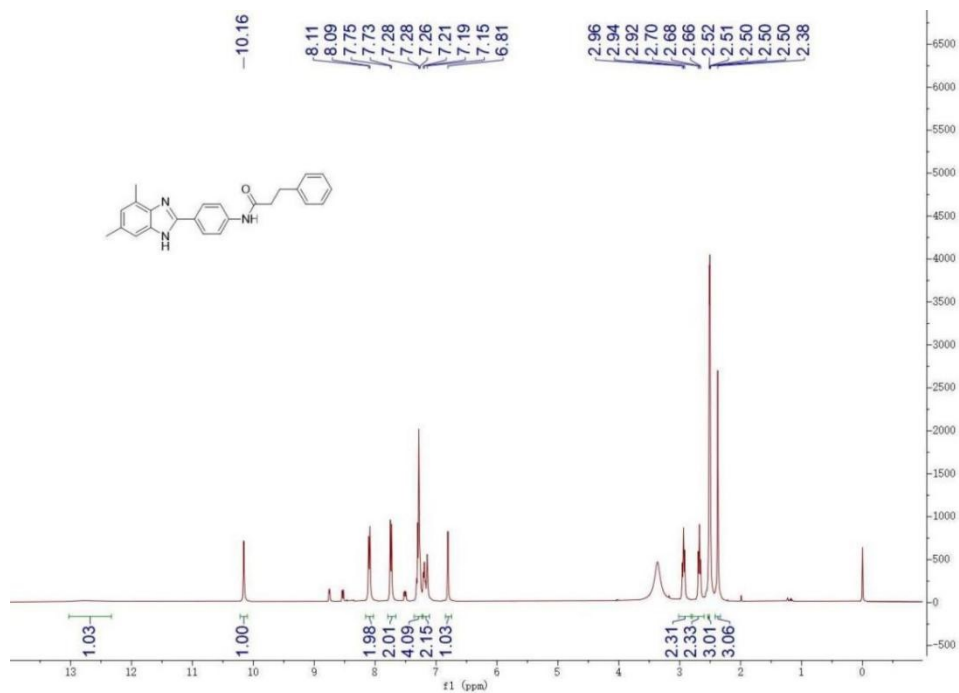

<sup>1</sup>H NMR of compound 19

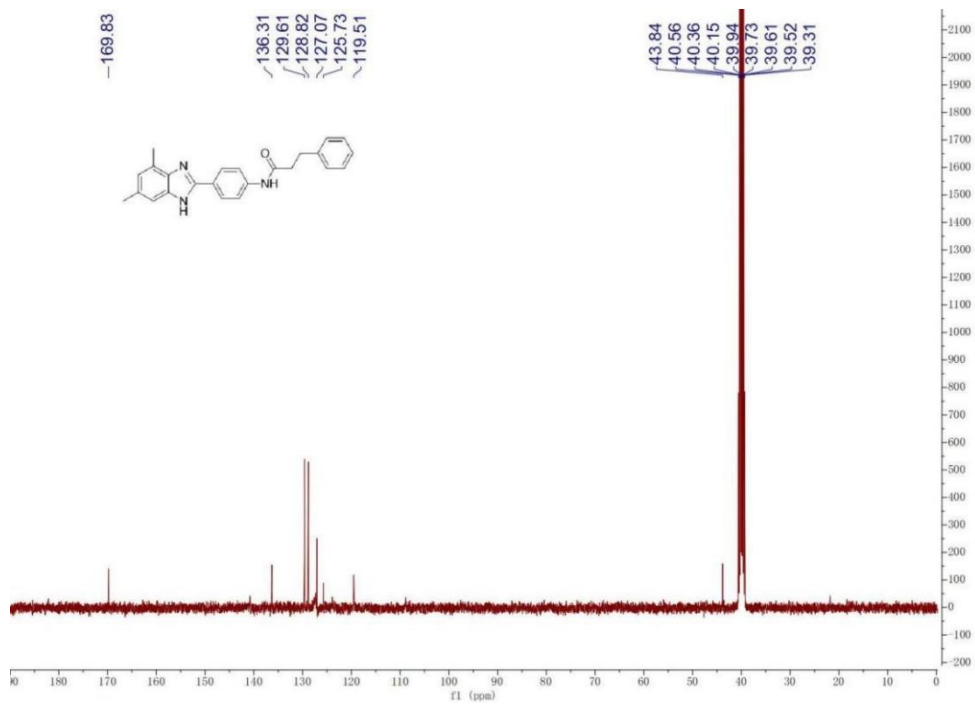

<sup>13</sup>C NMR of compound 19



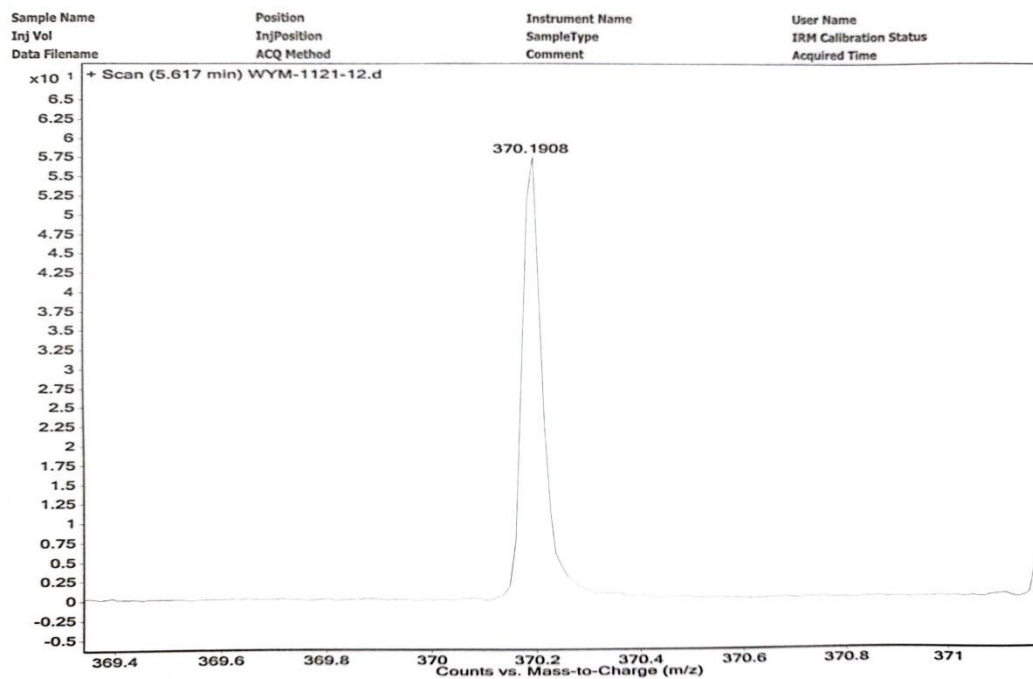

HR-MS of compound 19



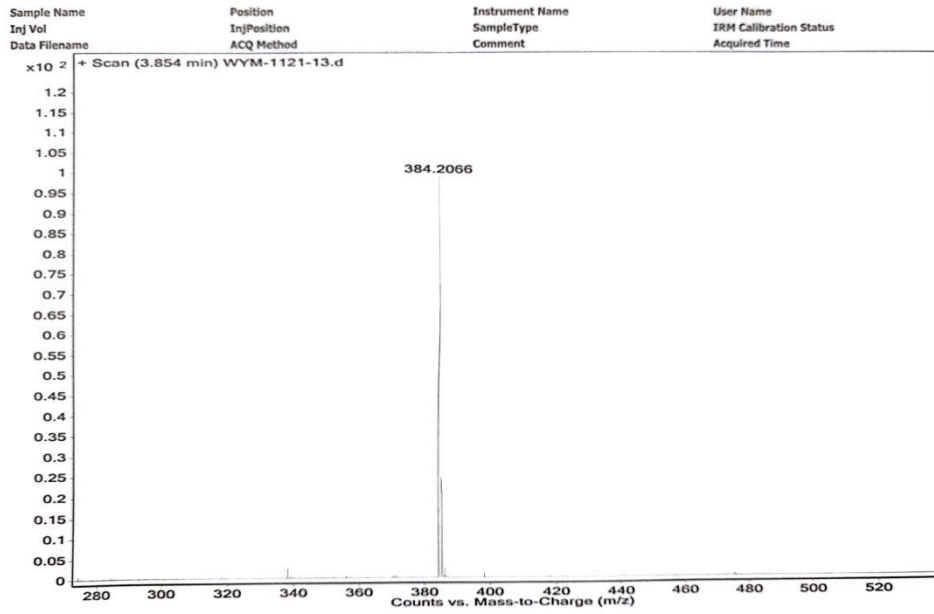

HR-MS of compound 20

N-(4-(4,6-dimethyl-1H-benzo[d]imidazol-2-yl)phenyl)-5-phenylpentanamide (21)

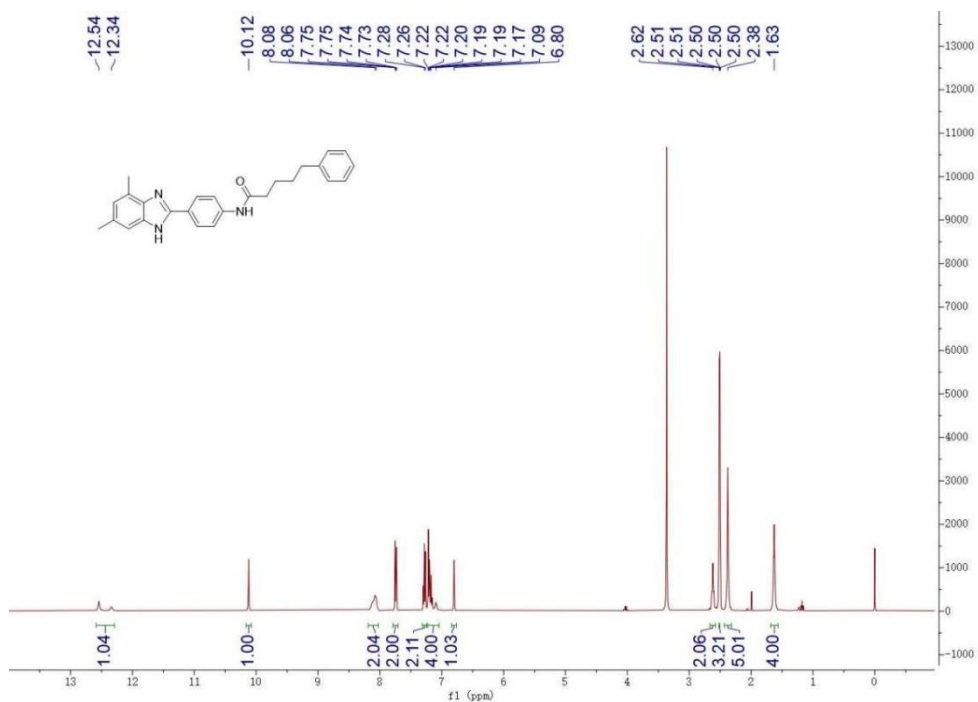

<sup>1</sup>H NMR of compound 21

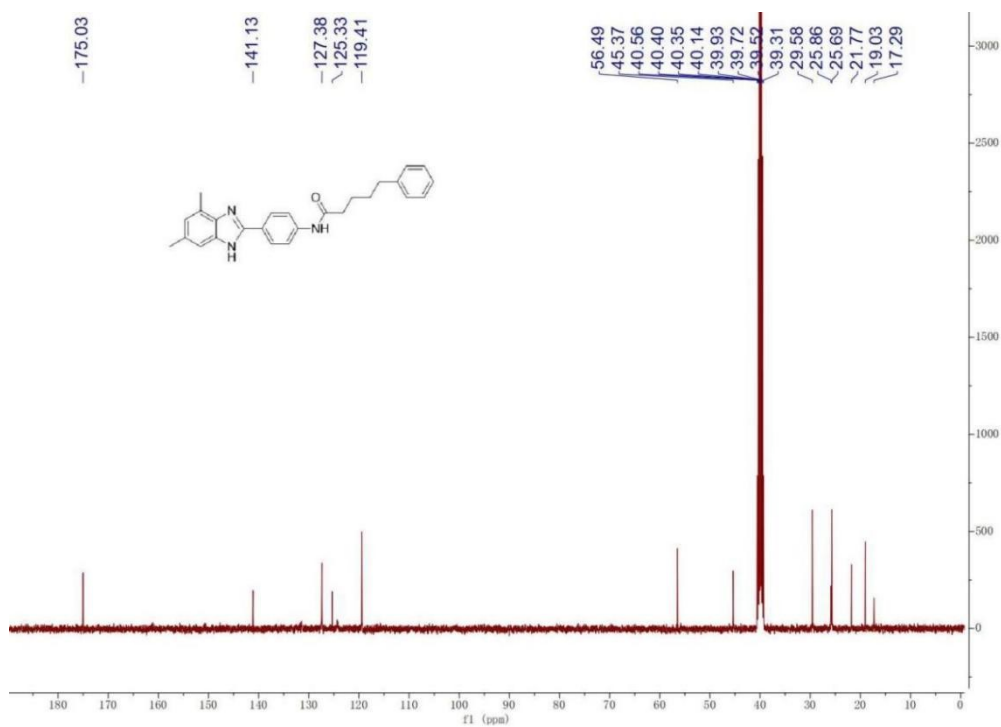

<sup>13</sup>C NMR of compound 21

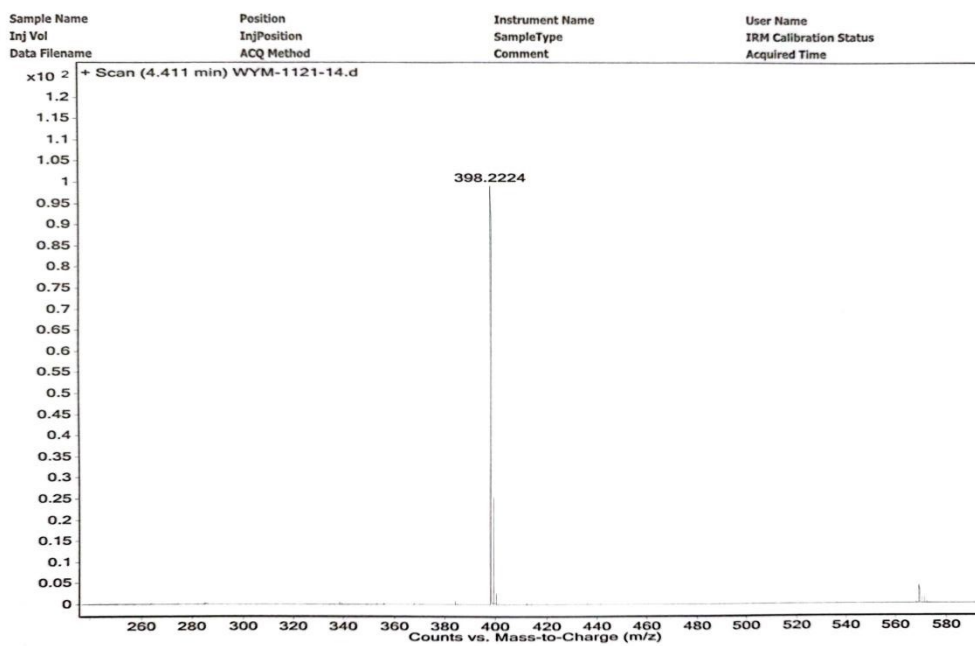

HR-MS of compound 21

*N*-(4-(4,6-dimethyl-1*H*-benzo[d]imidazol-2-yl)phenyl)cinnamamide (**22**)

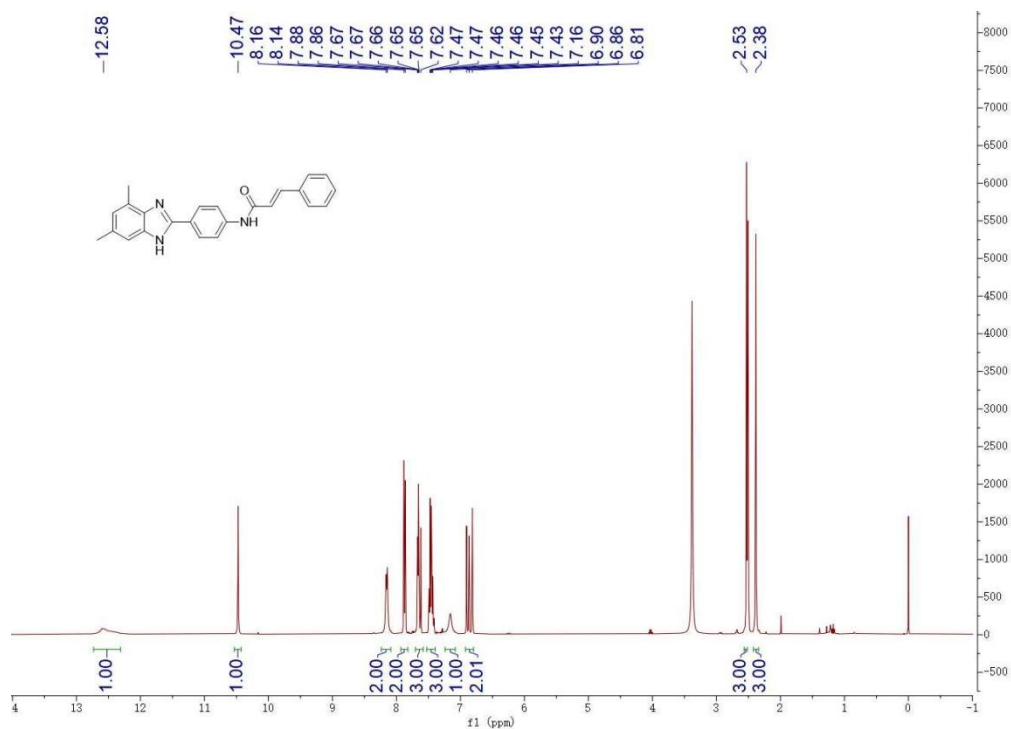

<sup>1</sup>H NMR of compound **22**

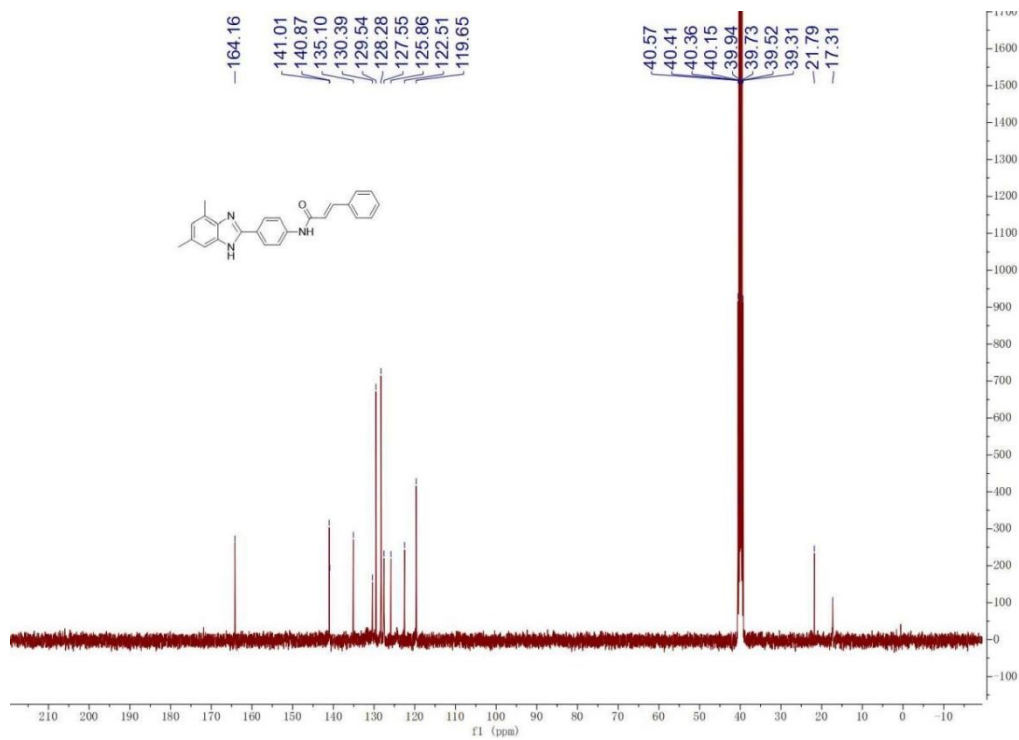

<sup>13</sup>C NMR of compound **22**

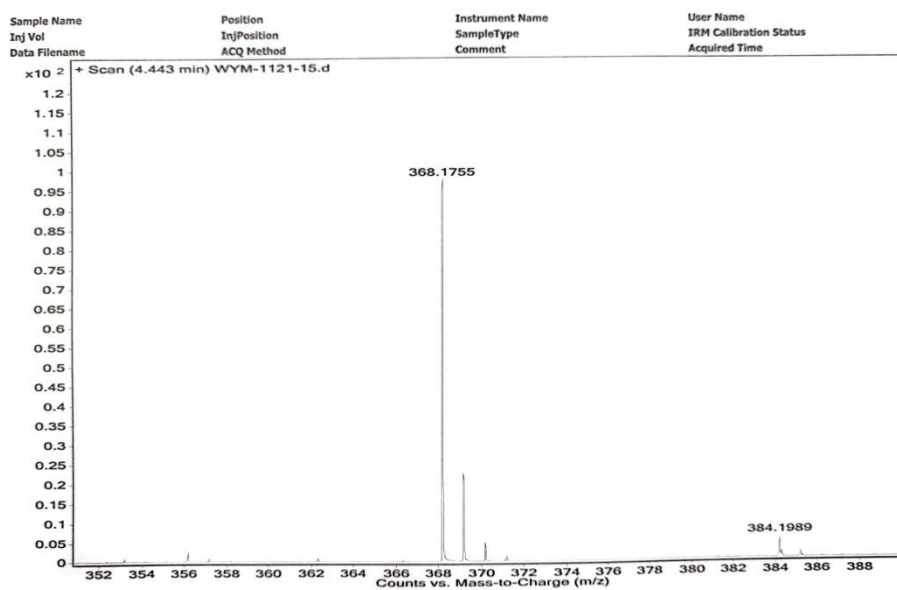

HR-MS of compound 22

*N*-(4-(4,6-dimethyl-1*H*-benzo[d]imidazol-2-yl)phenyl)isonicotinamide (**23**)

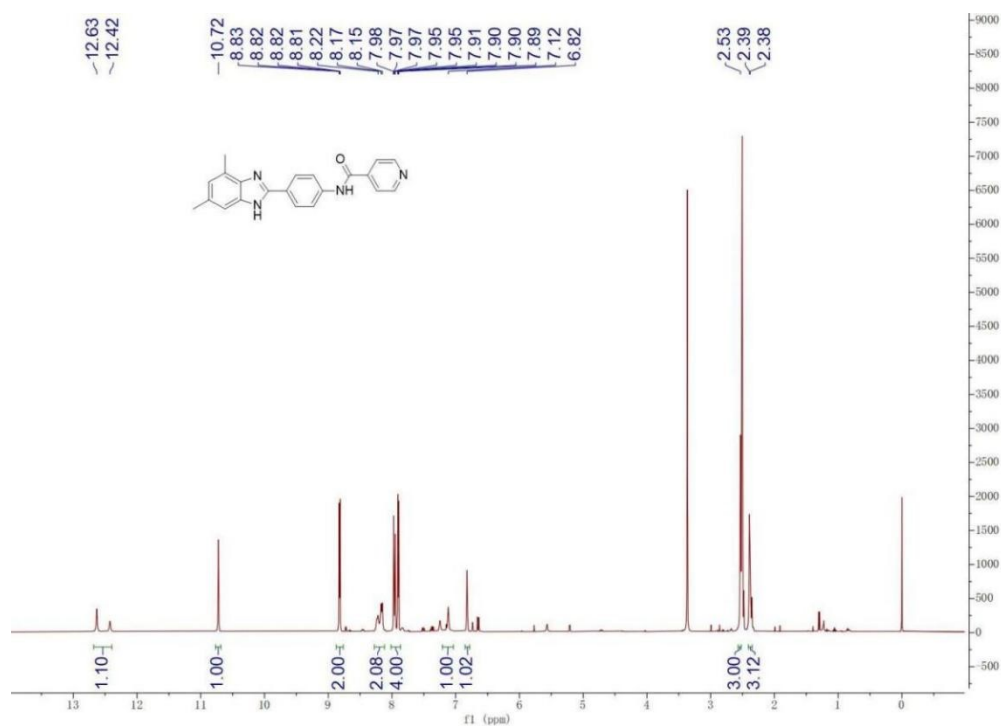

<sup>1</sup>H NMR of compound **23**

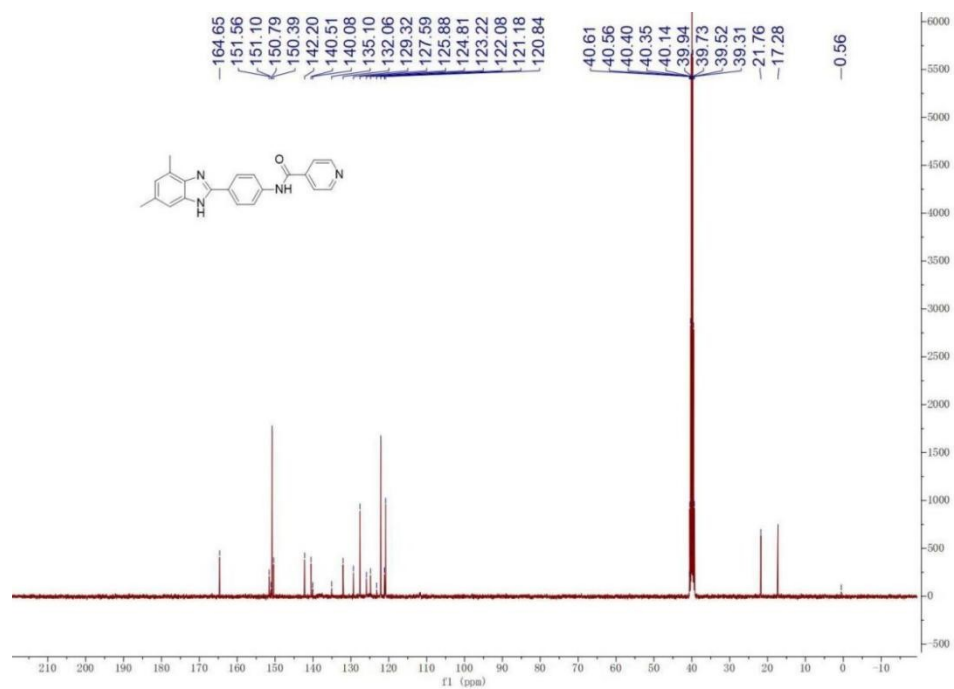

<sup>13</sup>C NMR of compound **23**



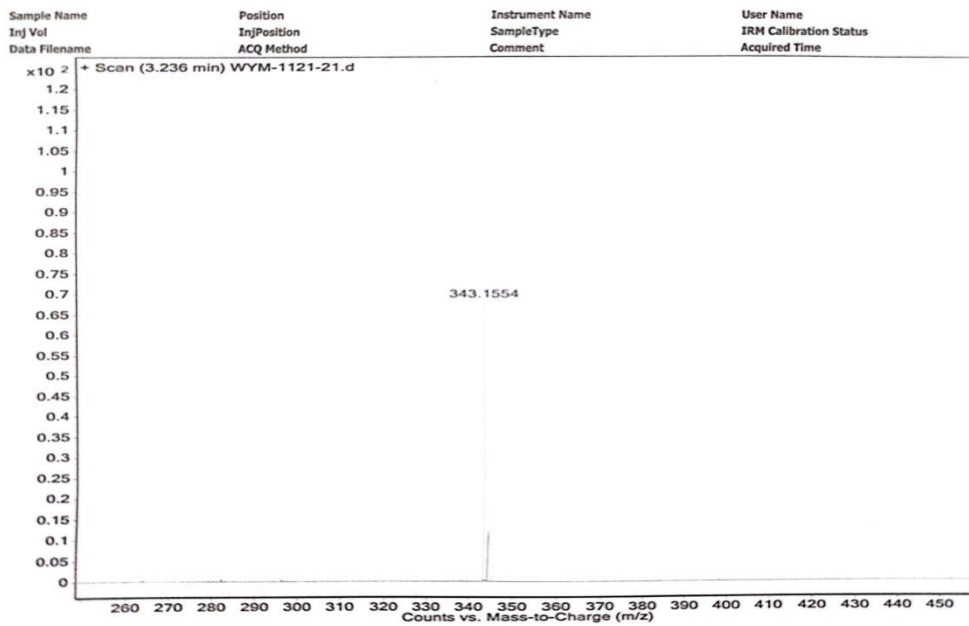

HR-MS of compound 23

*N*-(4-(4,6-dimethyl-1*H*-benzo[d]imidazol-2-yl)phenyl)nicotinamide (**24**)

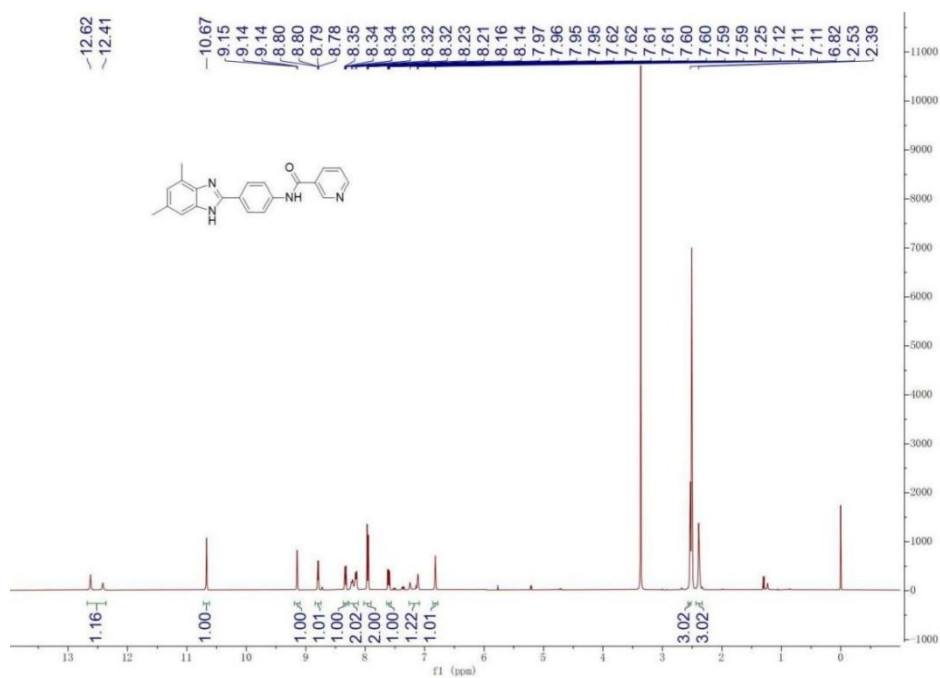

<sup>1</sup>H NMR of compound **24**

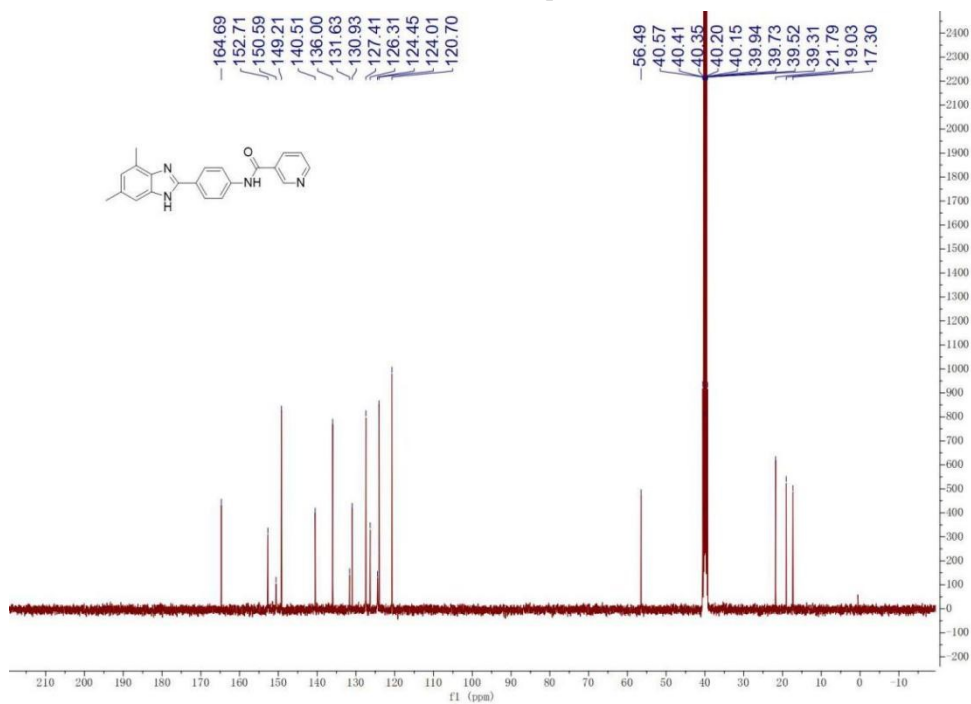

<sup>13</sup>C NMR of compound **24**

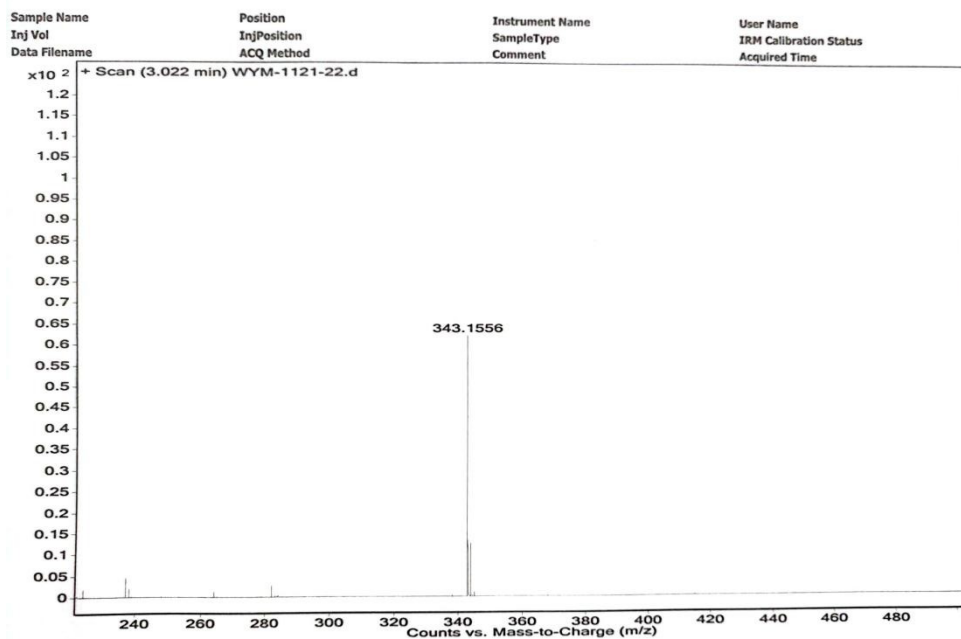

HR-MS of compound 24

*N*-(4-(4,6-dimethyl-1*H*-benzo[d]imidazol-2-yl)phenyl)cyclopropanecarboxamide (**25**)

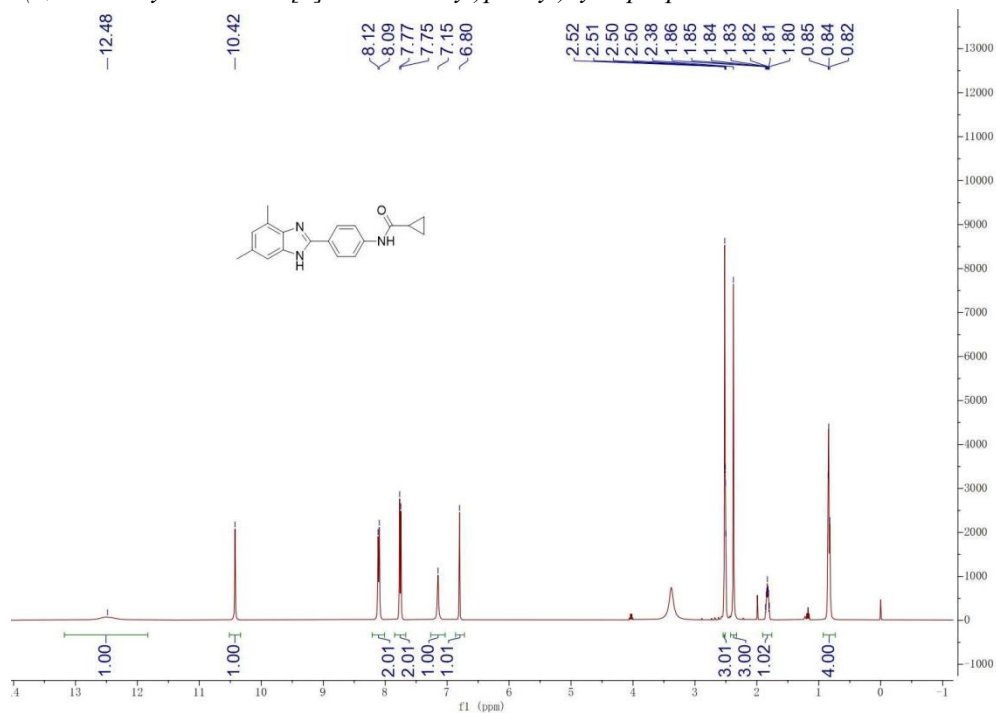

<sup>1</sup>H NMR of compound **25**

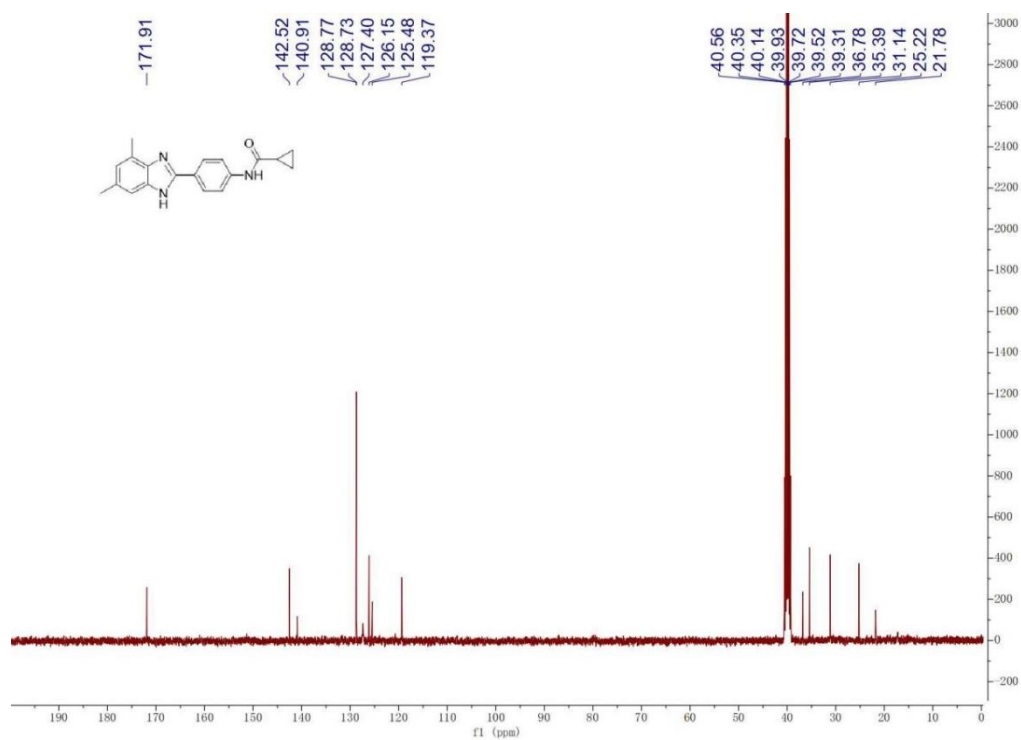

<sup>13</sup>C NMR of compound **25**

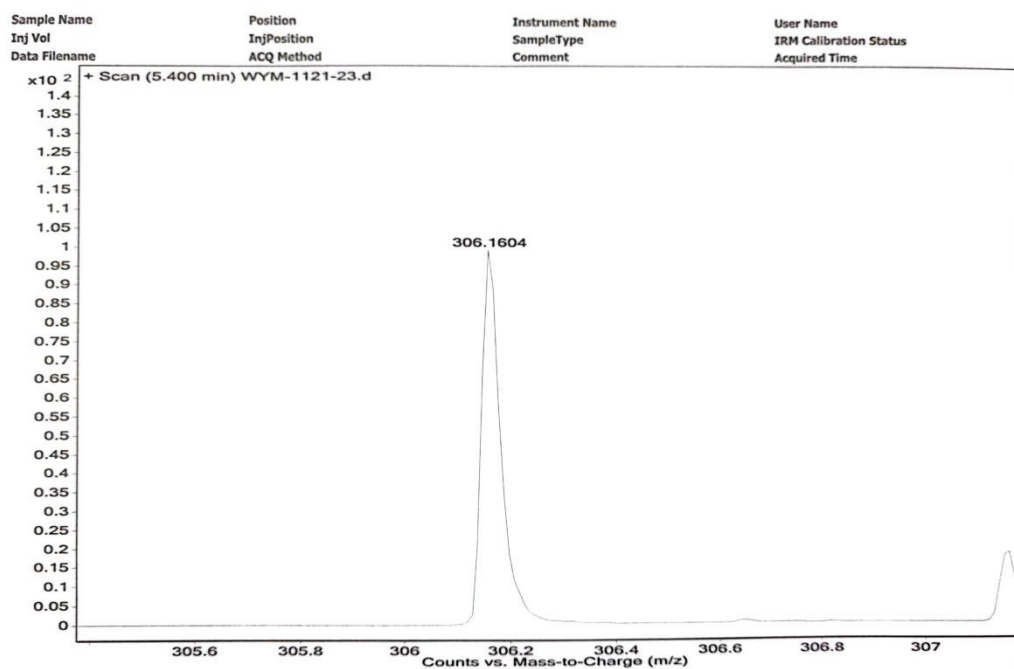

HR-MS of compound 25

*N*-(4-(4,6-dimethyl-1*H*-benzo[d]imidazol-2-yl)phenyl)cyclohexanecarboxamide (**26**)

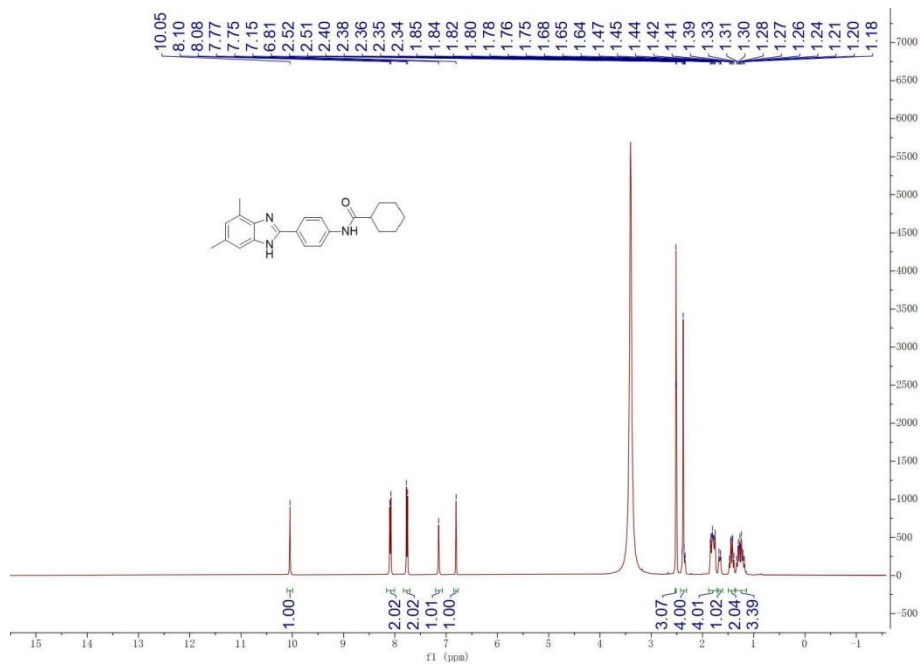

<sup>1</sup>H NMR of compound **26**

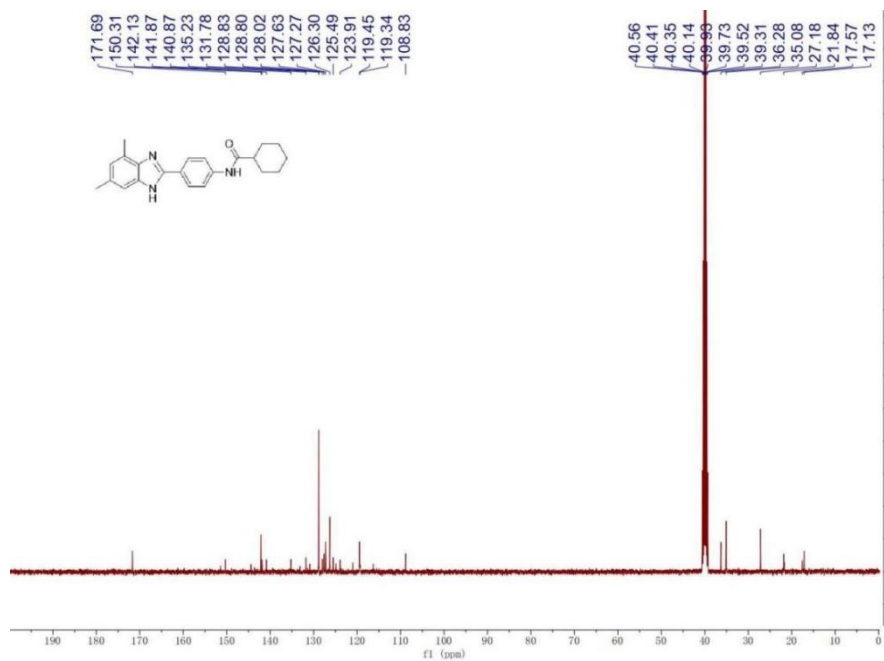

<sup>13</sup>C NMR of compound **26**

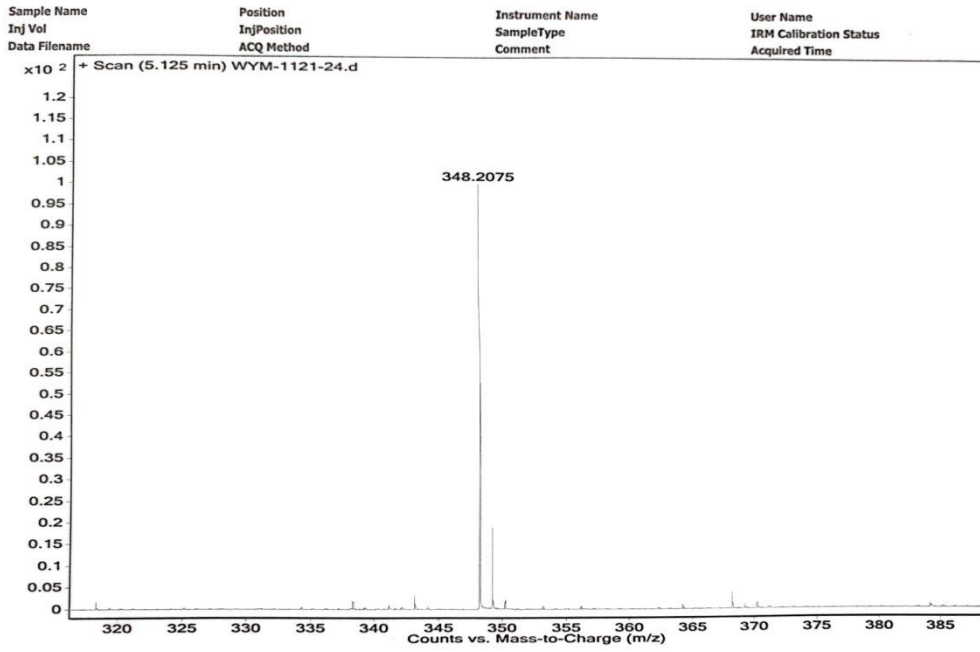

HR-MS of compound 26

*N*-(4-(4,6-dimethyl-1*H*-benzo[d]imidazol-2-yl)phenyl)-4,4-difluorocyclohexane-1-carboxamide (27)

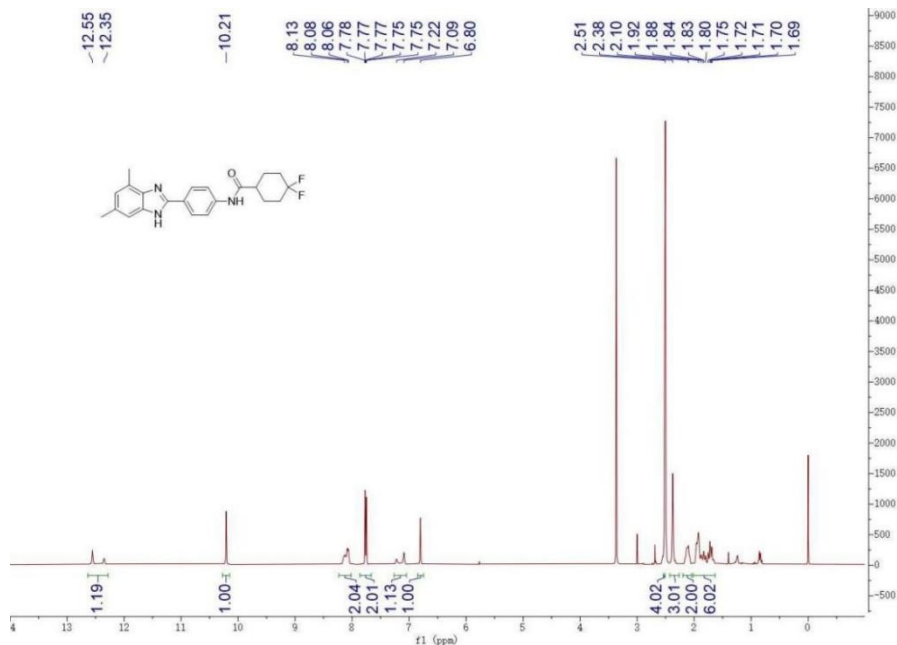

<sup>1</sup>H NMR of compound 27

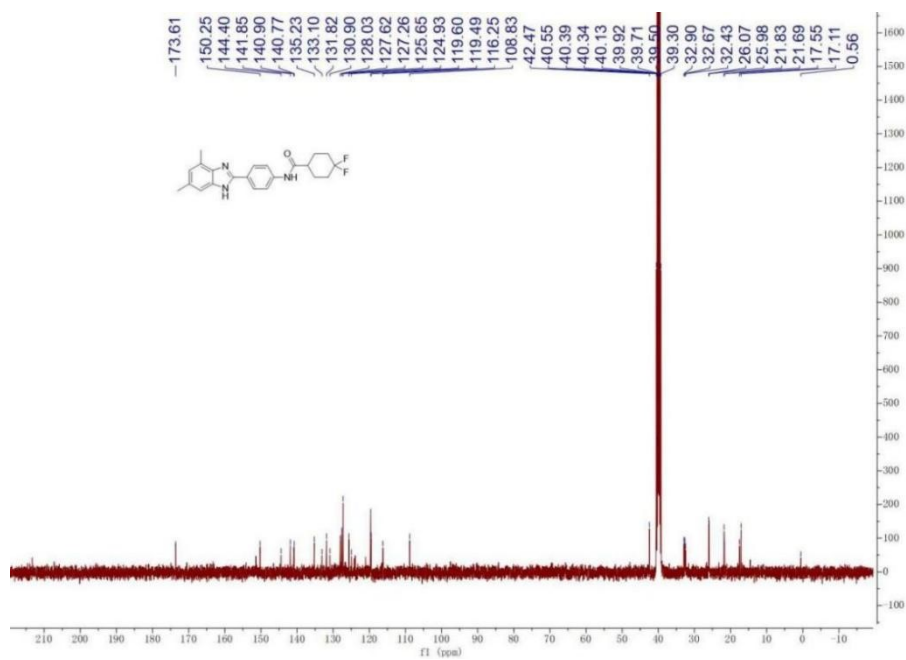

<sup>13</sup>C NMR of compound 27



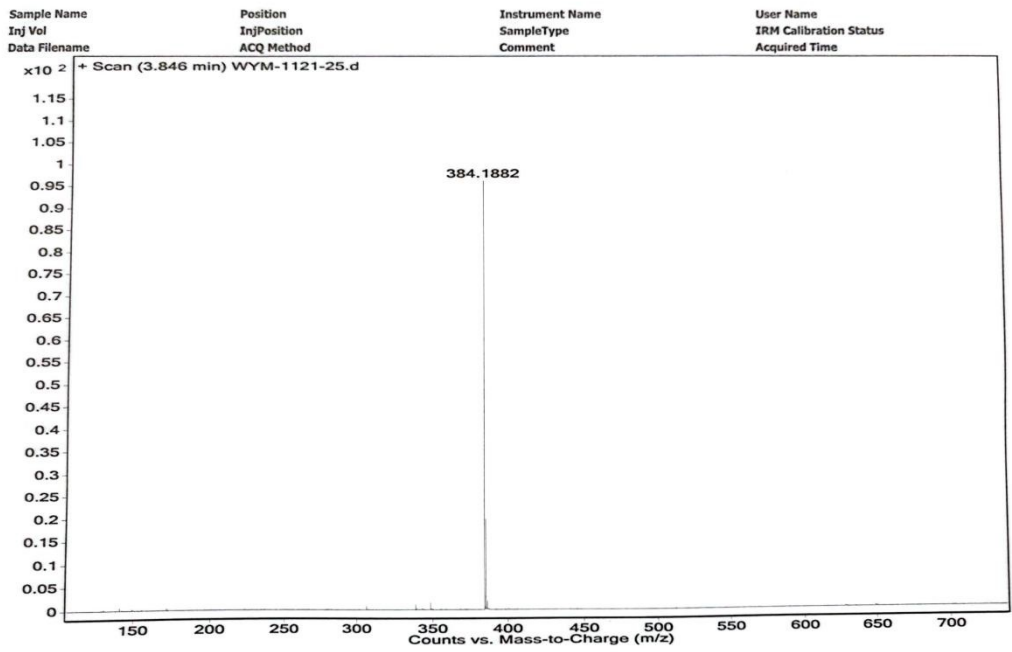

HR-MS of compound 27

*N*-(4-(4,6-dimethyl-1*H*-benzo[*d*]imidazol-2-yl)phenyl)-4-methylcyclohexane-1-carboxamide (**28**)

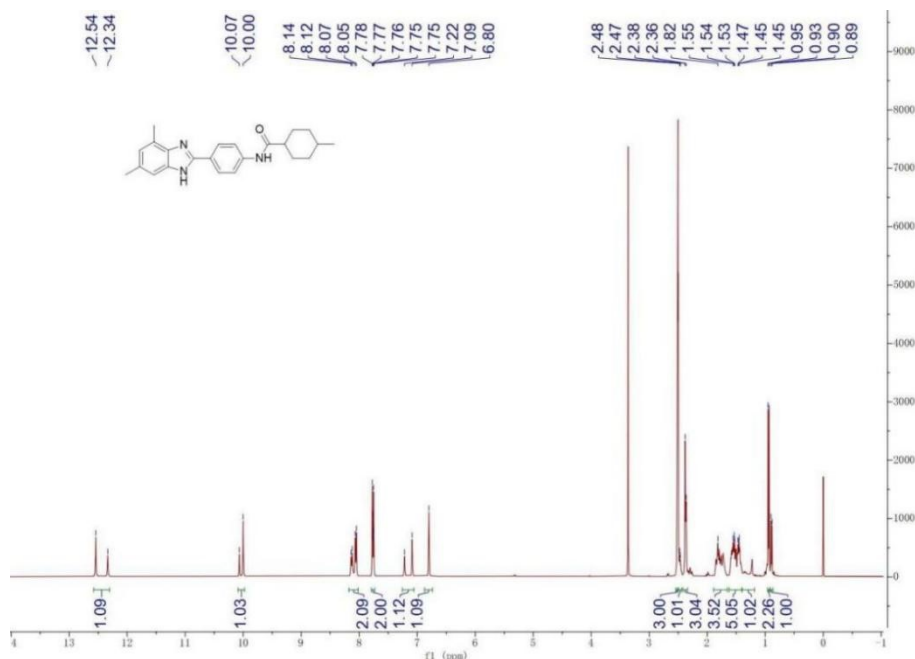

<sup>1</sup>H NMR of compound **28**

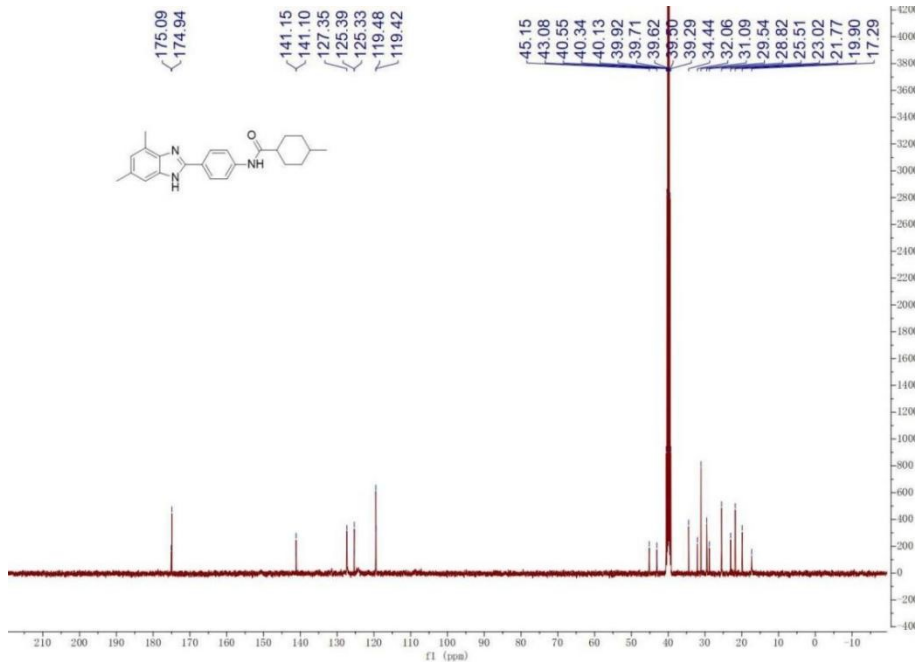

<sup>13</sup>C NMR of compound **28**

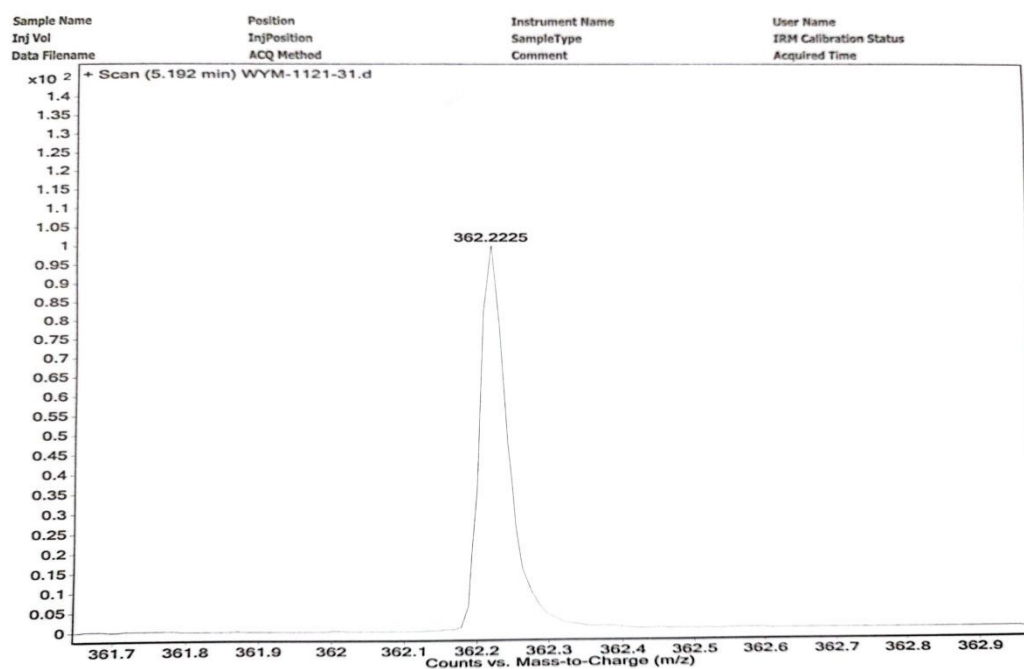

HR-MS of compound 28

*(1r,4r)*-N-(4-(4,6-dimethyl-1H-benzo[d]imidazol-2-yl)phenyl)-4-isopropylcyclohexane-1-carboxamide (**29**)

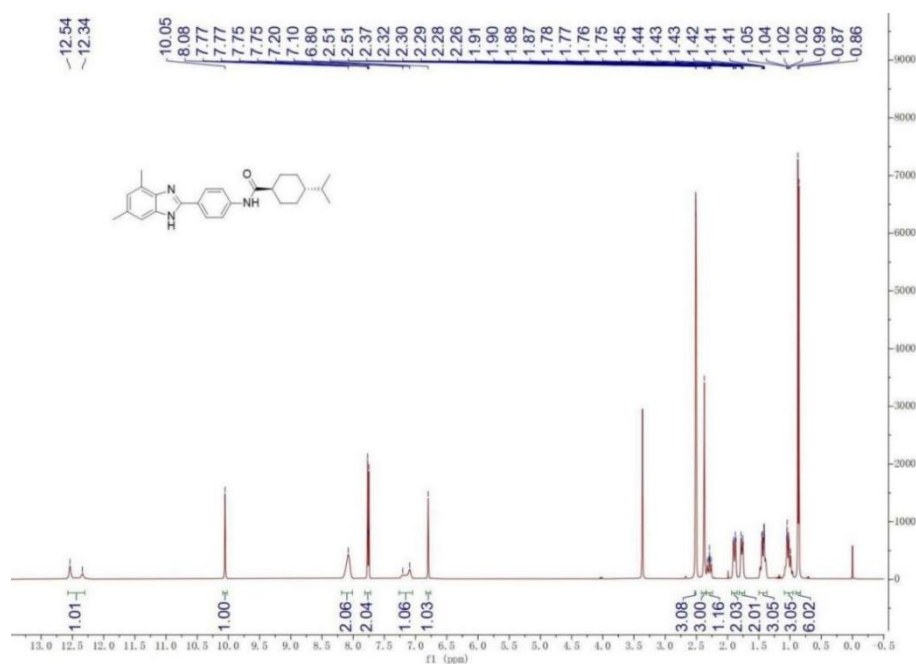

$^1\text{H}$  NMR of compound **29**

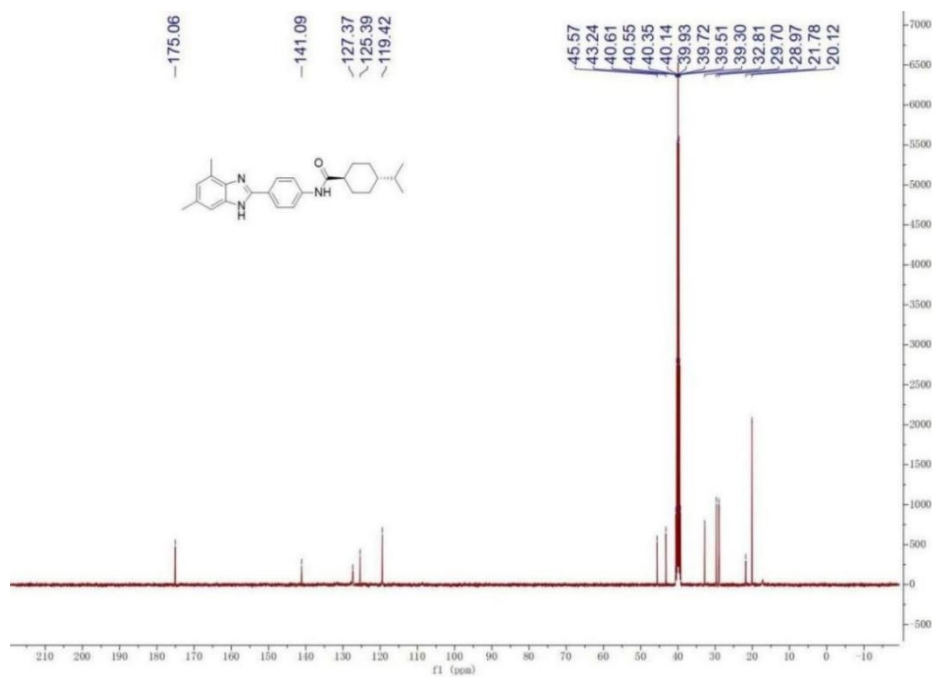

$^{13}\text{C}$  NMR of compound **29**

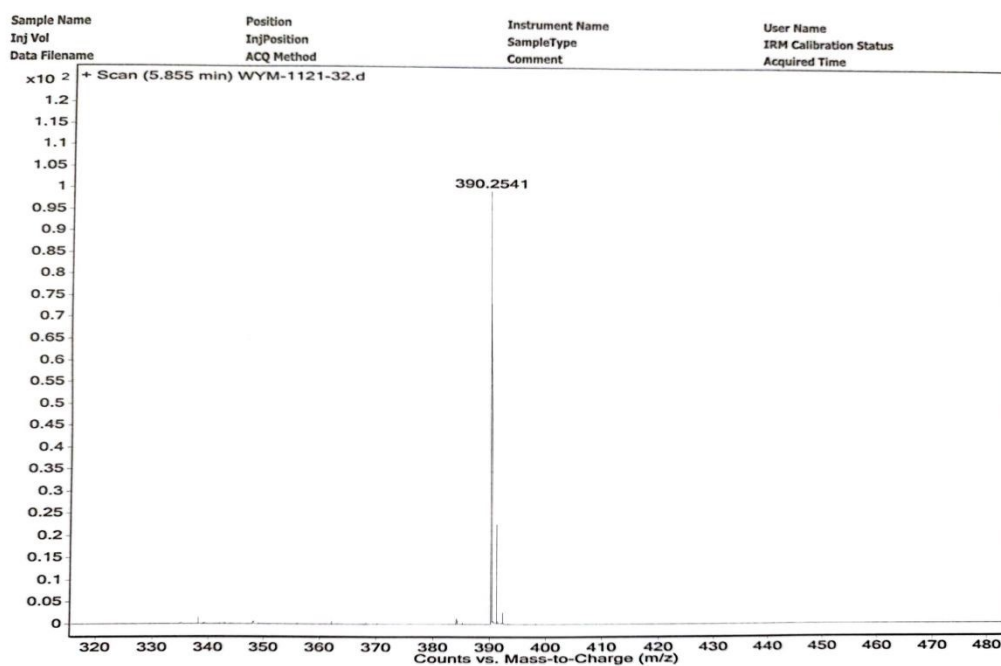

HR-MS of compound 29

*N*-(4-(4,6-dimethyl-1*H*-benzo[d]imidazol-2-yl)phenyl)tetrahydro-2*H*-pyran-4-carboxamide (**30**)

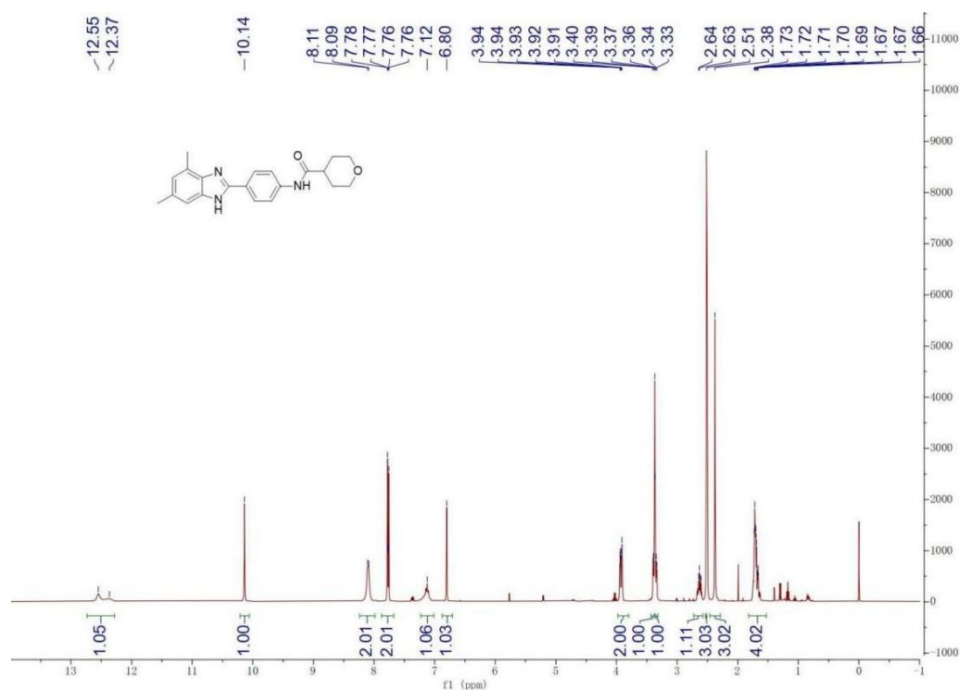

<sup>1</sup>H NMR of compound **30**

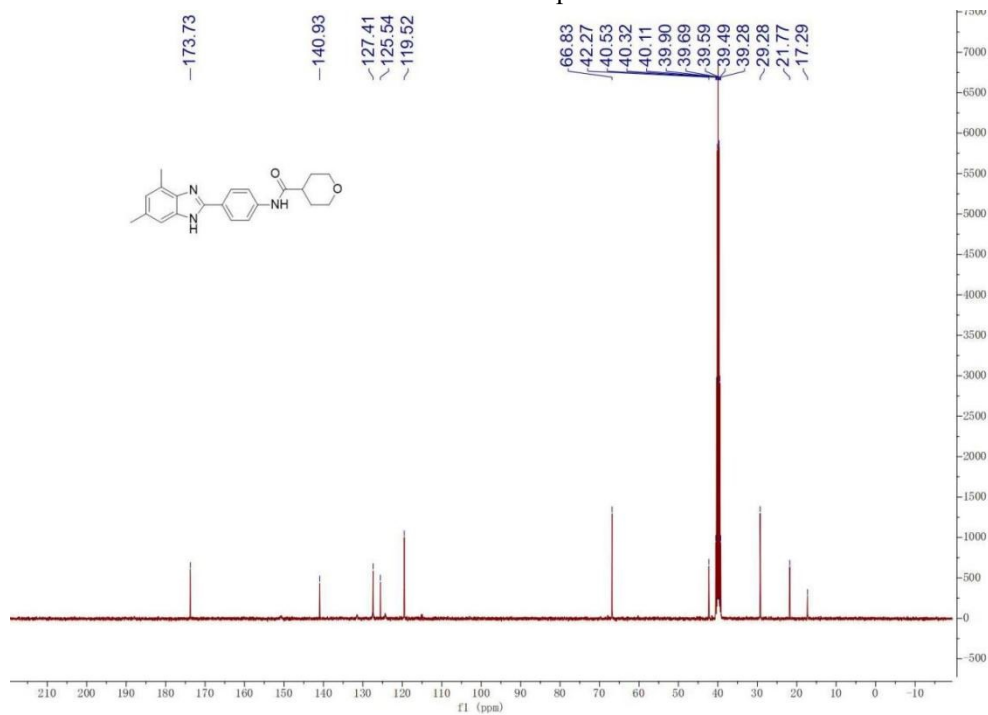

<sup>13</sup>C NMR of compound **30**

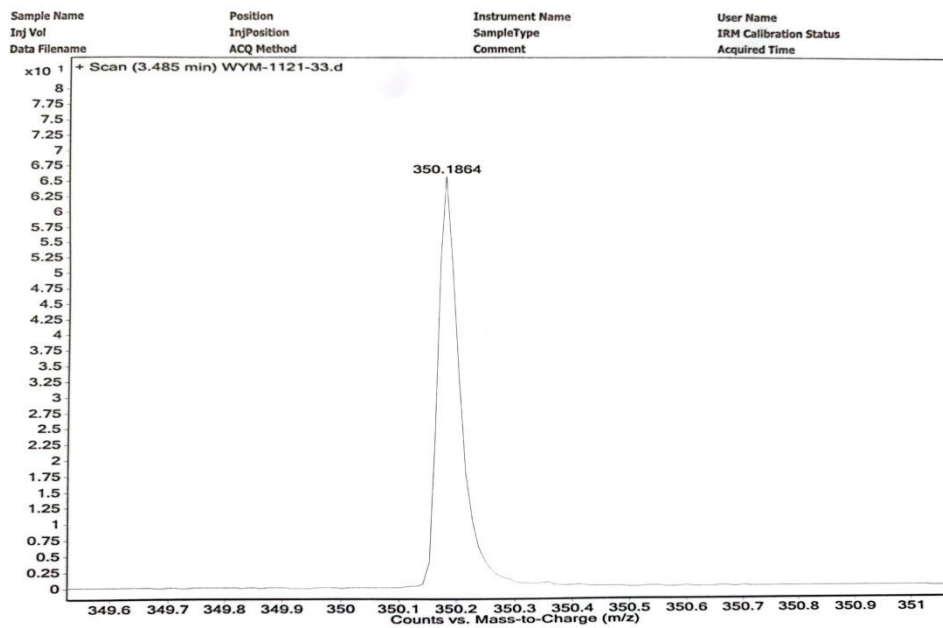

HR-MS of compound 30

(3*r*,5*r*,7*r*)-*N*-(4-(4,6-dimethyl-1*H*-benzo[*d*]imidazol-2-yl)phenyl)adamantane-1-carboxamide (**31**)

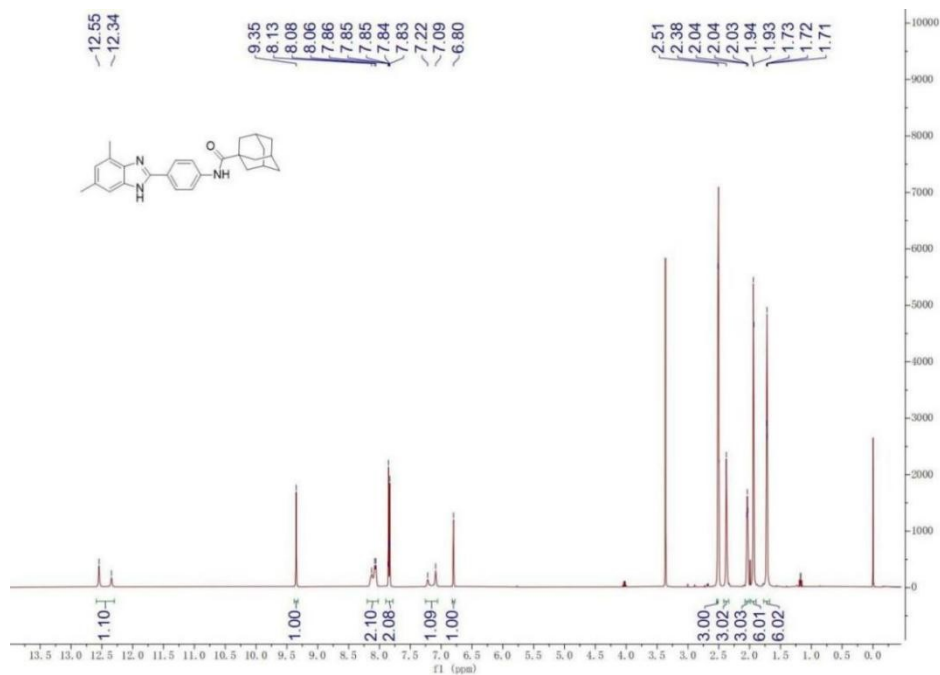

<sup>1</sup>H NMR of compound 31

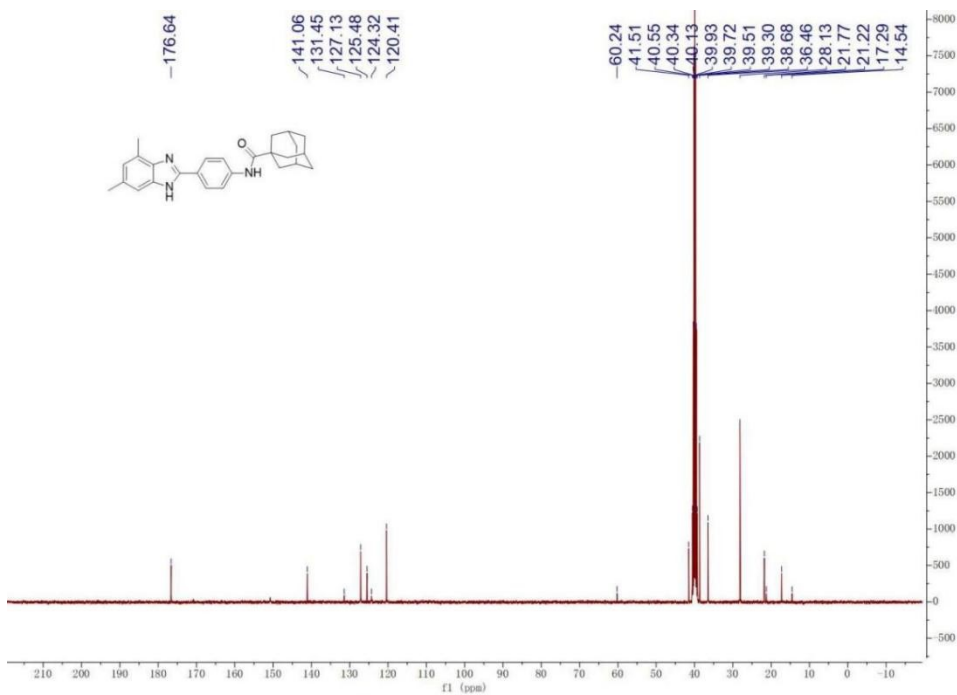

<sup>13</sup>C NMR of compound 31



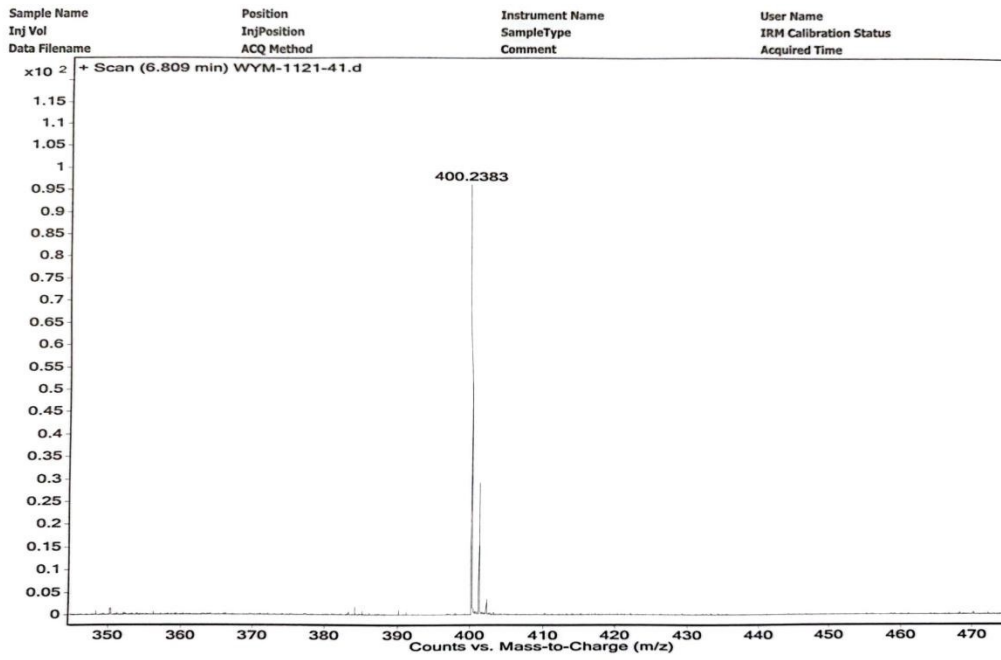

HR-MS of compound 31

*(1r,3R,5S,7r)*-N-(4-(4,6-dimethyl-1H-benzodimidazol-2-yl)phenyl)-3,5-dimethyladamantane-1-carboxamide (**32**)

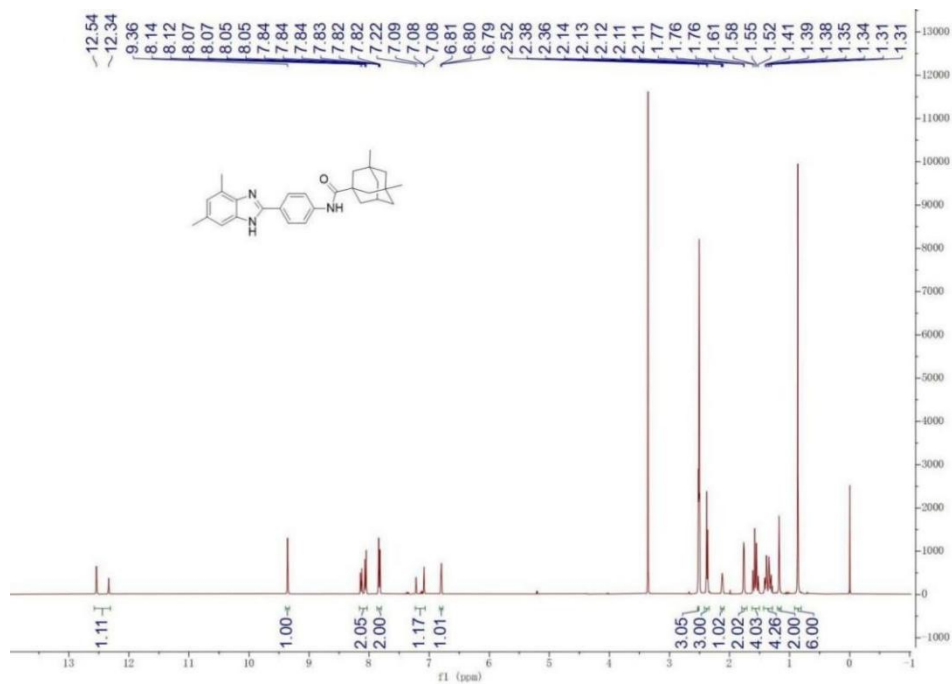

<sup>1</sup>H NMR of compound 32

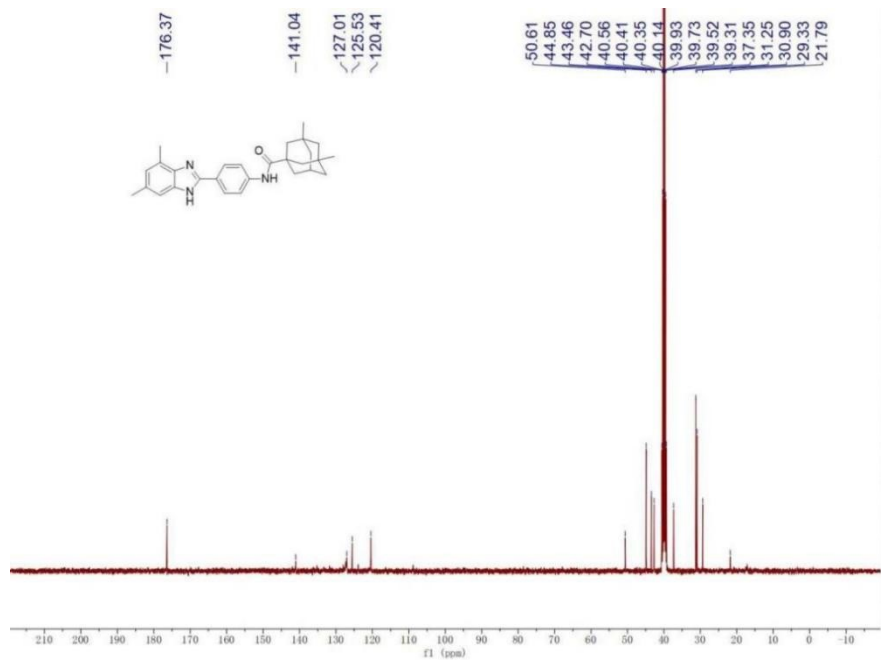

<sup>13</sup>C NMR of compound 32

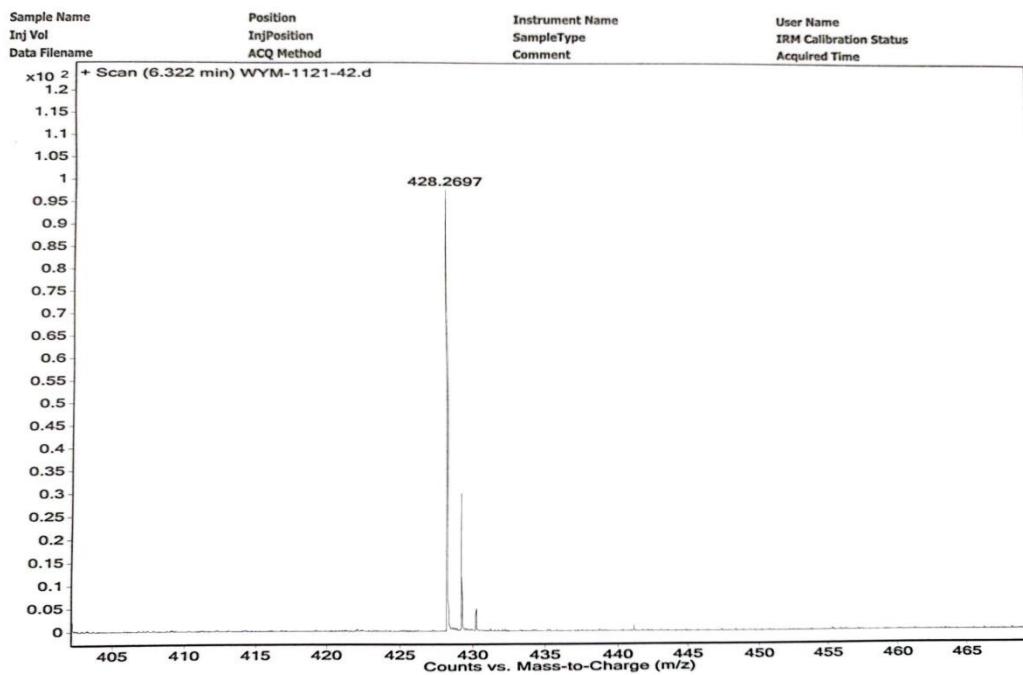

HR-MS of compound 32

*N*-(4-(1,4,6-trimethyl-1*H*-benzo[*d*]imidazol-2-yl)phenyl)cyclohexanecarboxamide (**33**)

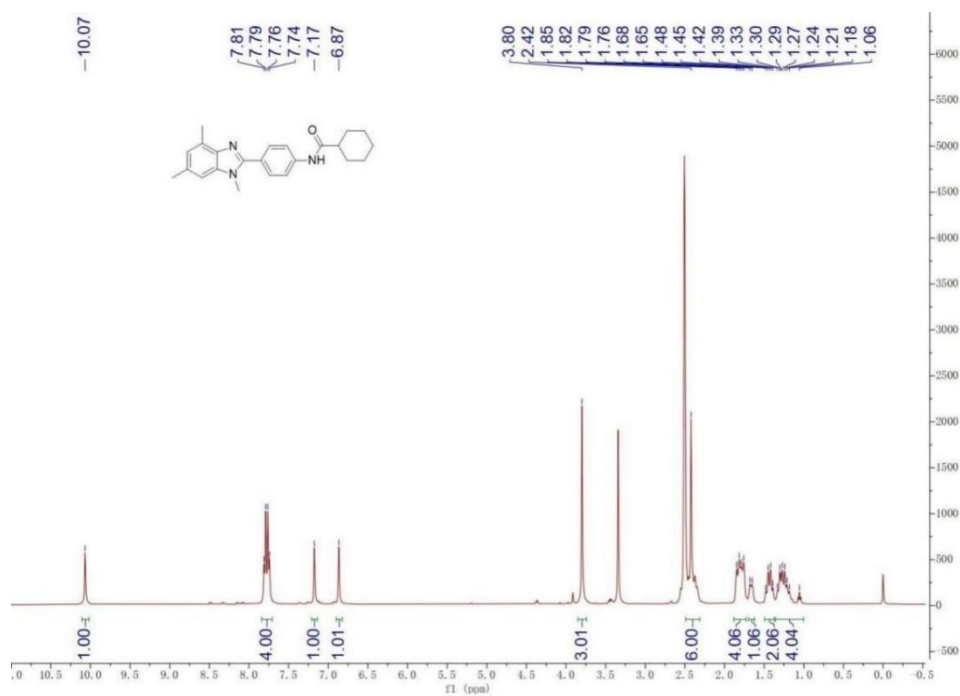

<sup>1</sup>H NMR of compound 33

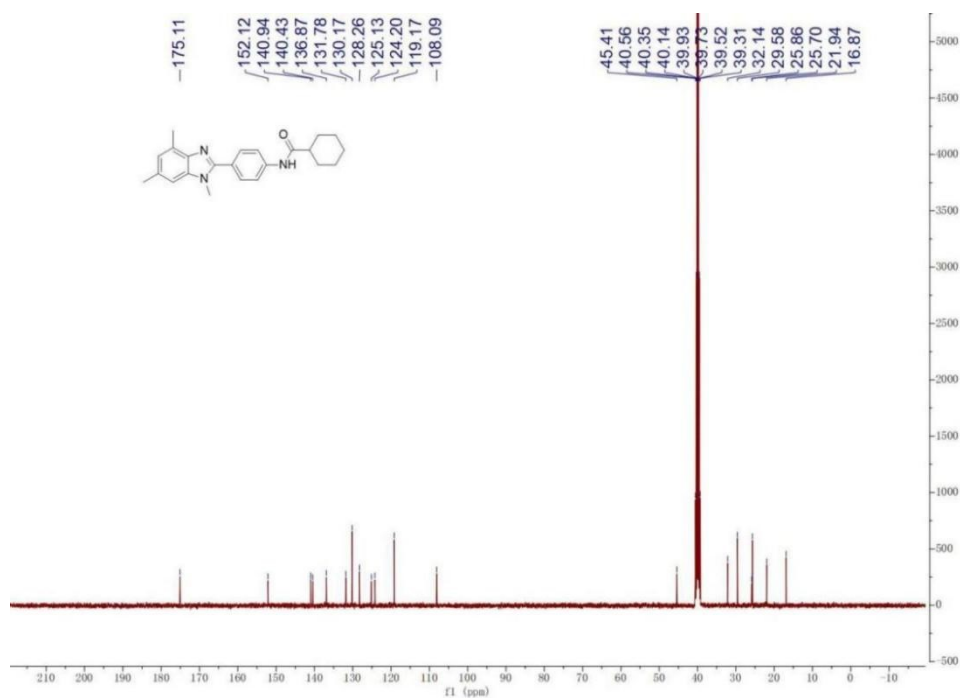

<sup>13</sup>C NMR of compound 33

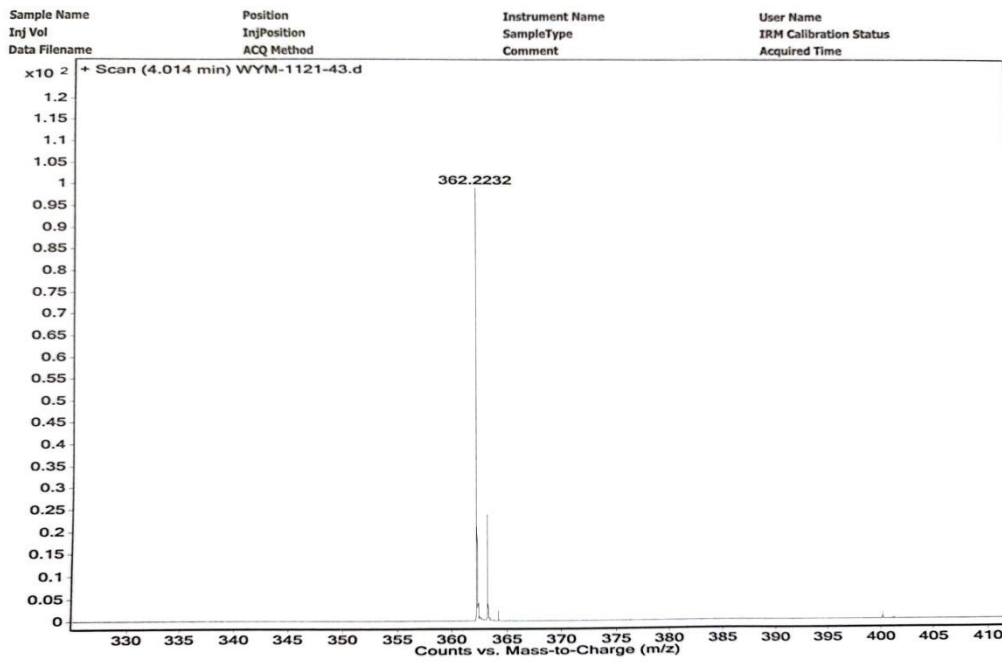

HR-MS of compound 33

4,4-difluoro-N-(4-(1,4,6-trimethyl-1H-benzo[d]imidazol-2-yl)phenyl)cyclohexane-1-carboxamide (34)

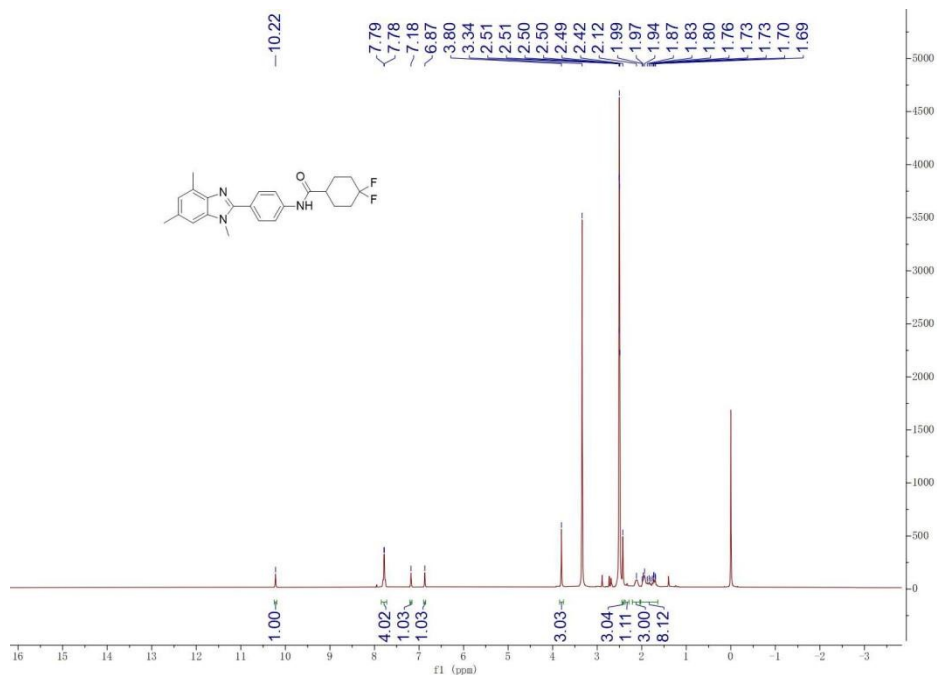

<sup>1</sup>H NMR of compound 34

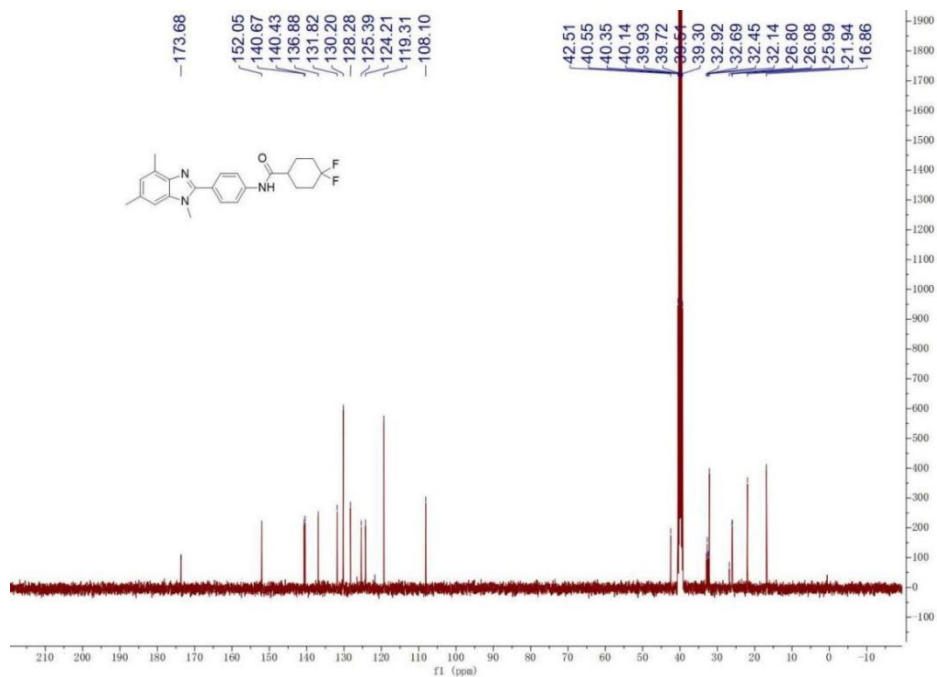

<sup>13</sup>C NMR of compound 34

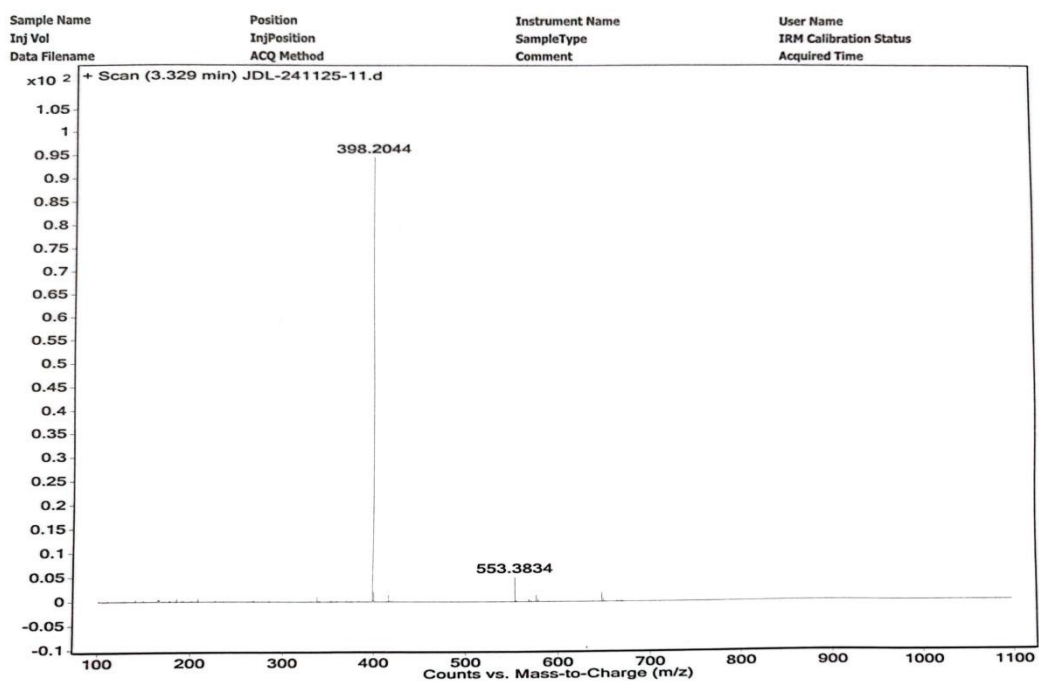

HR-MS of compound 34

*N*-(4-(4,6-dimethylbenzo[d]oxazol-2-yl)phenyl)cyclohexanecarboxamide (**35**)

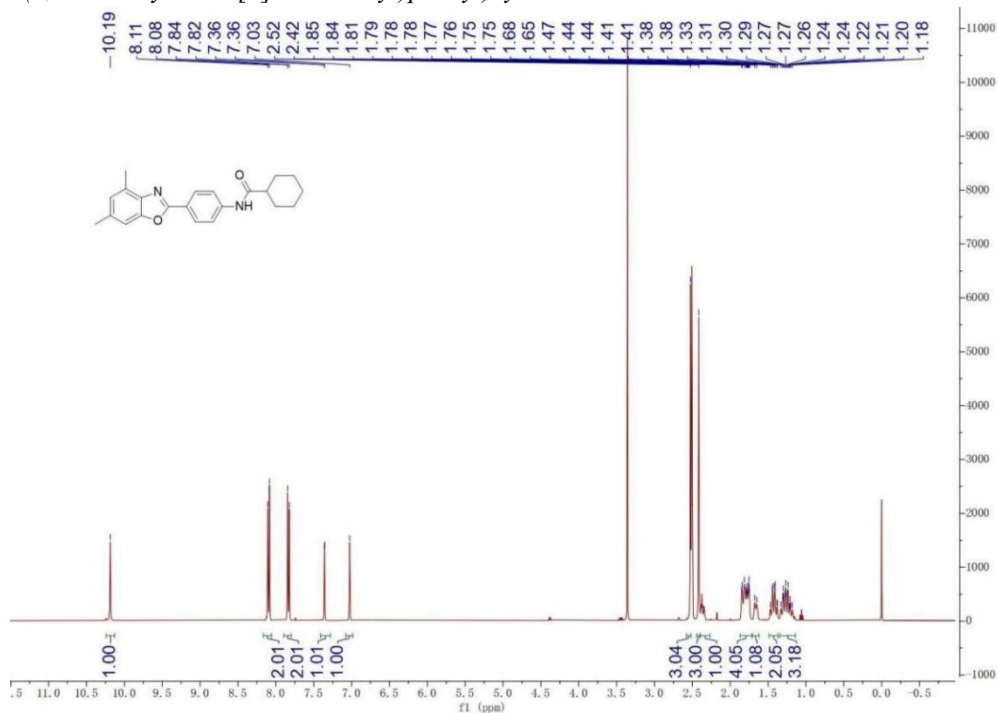

<sup>1</sup>H NMR of compound 35

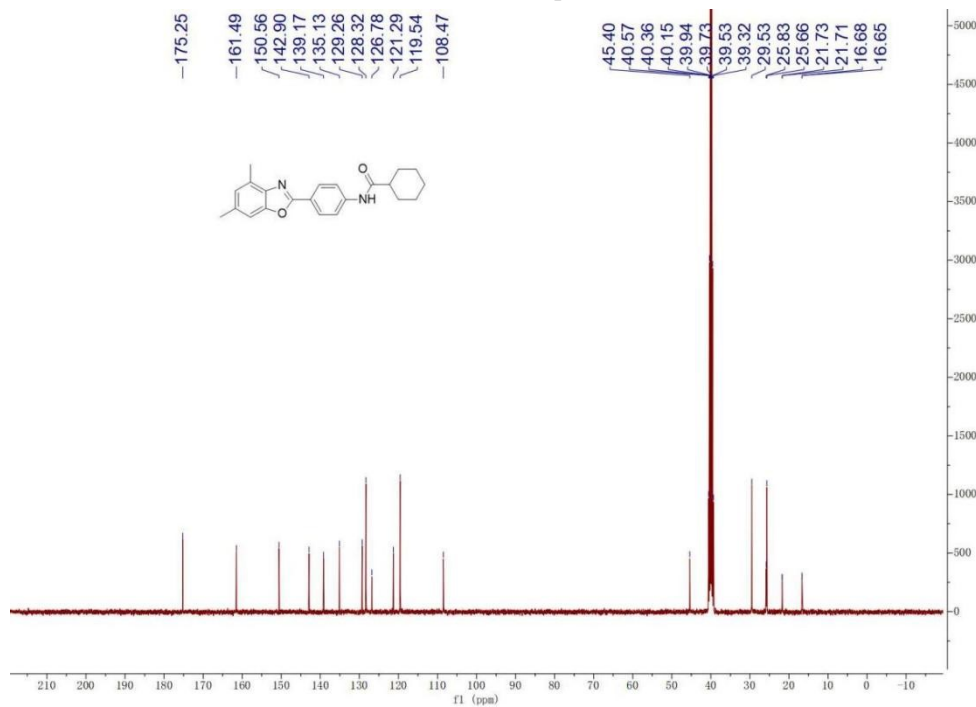

<sup>13</sup>C NMR of compound 35



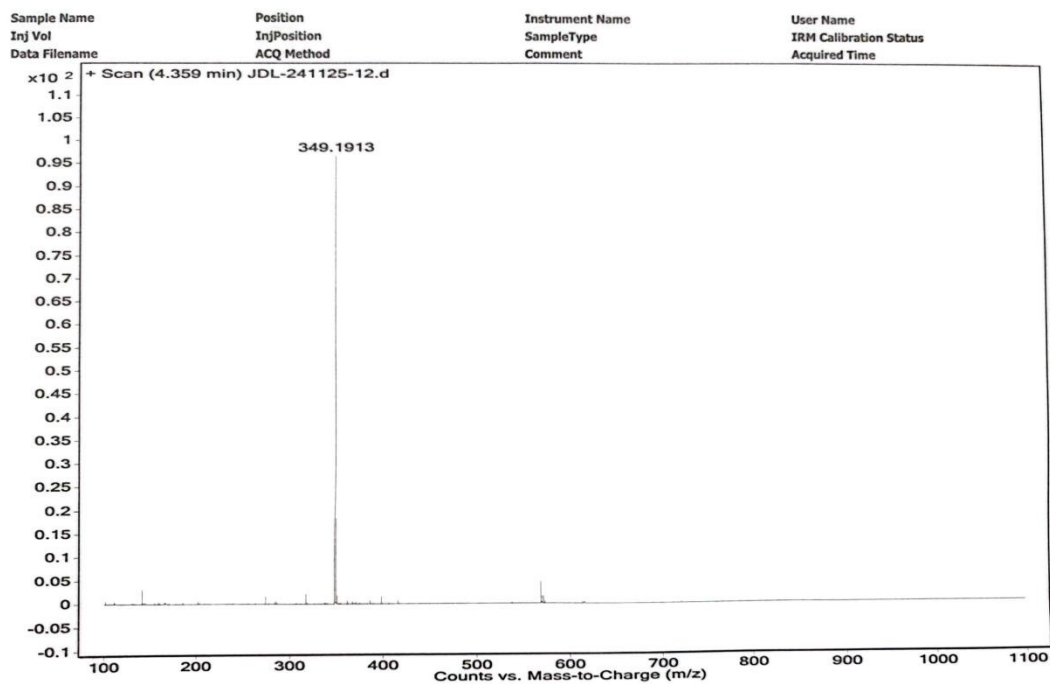

HR-MS of compound 35

*N*-(4-(4,6-dimethylbenzo[d]oxazol-2-yl)phenyl)-4,4-difluorocyclohexane-1-carboxamide (36)

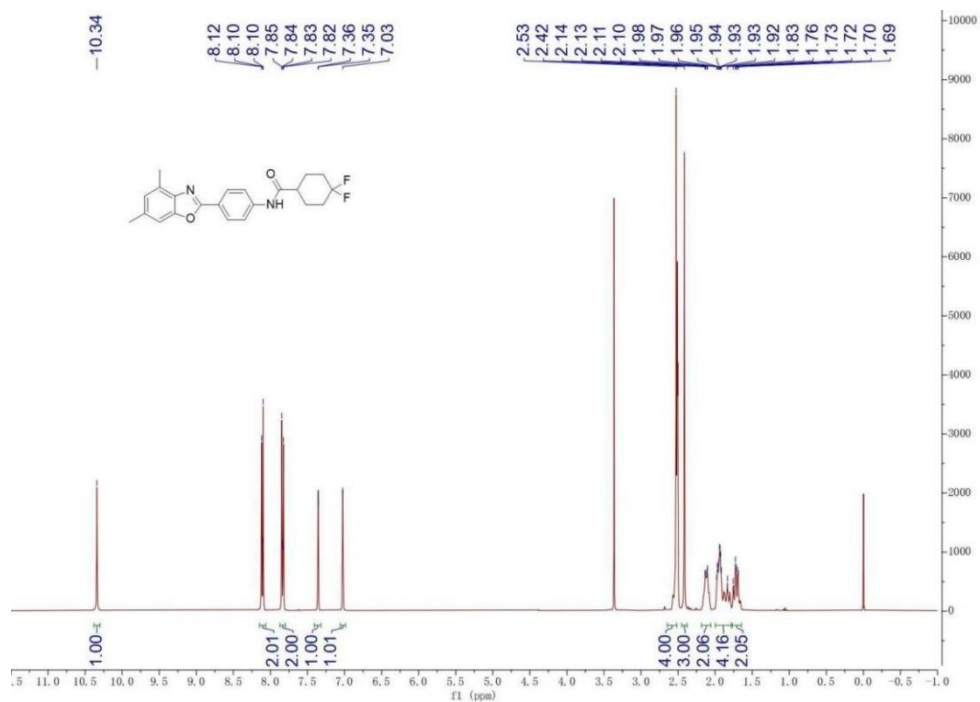

<sup>1</sup>H NMR of compound 36

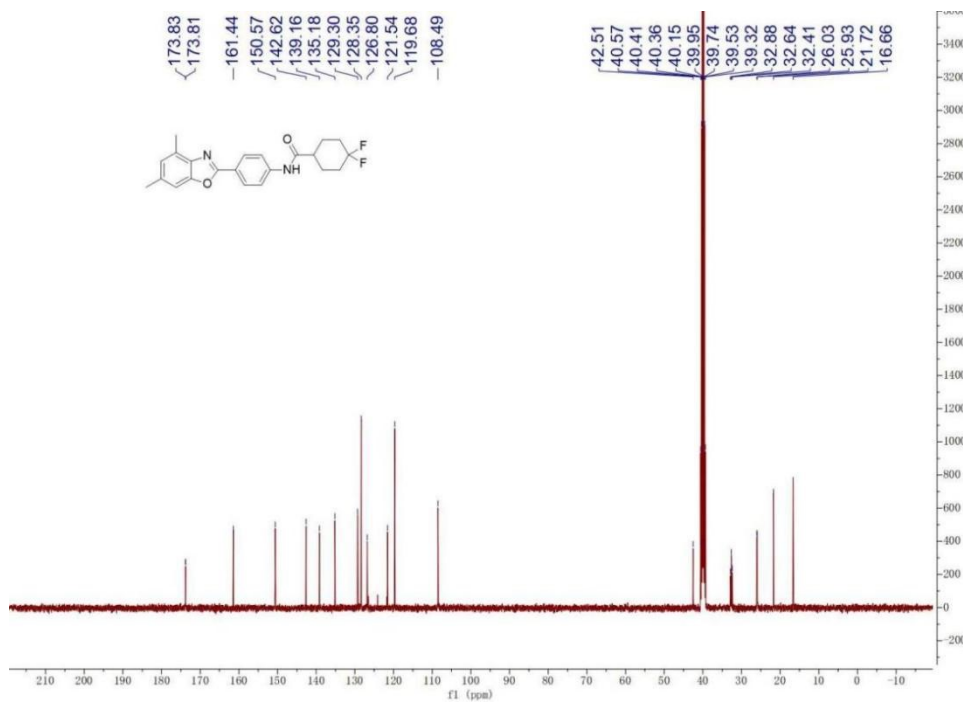

<sup>13</sup>C NMR of compound 36

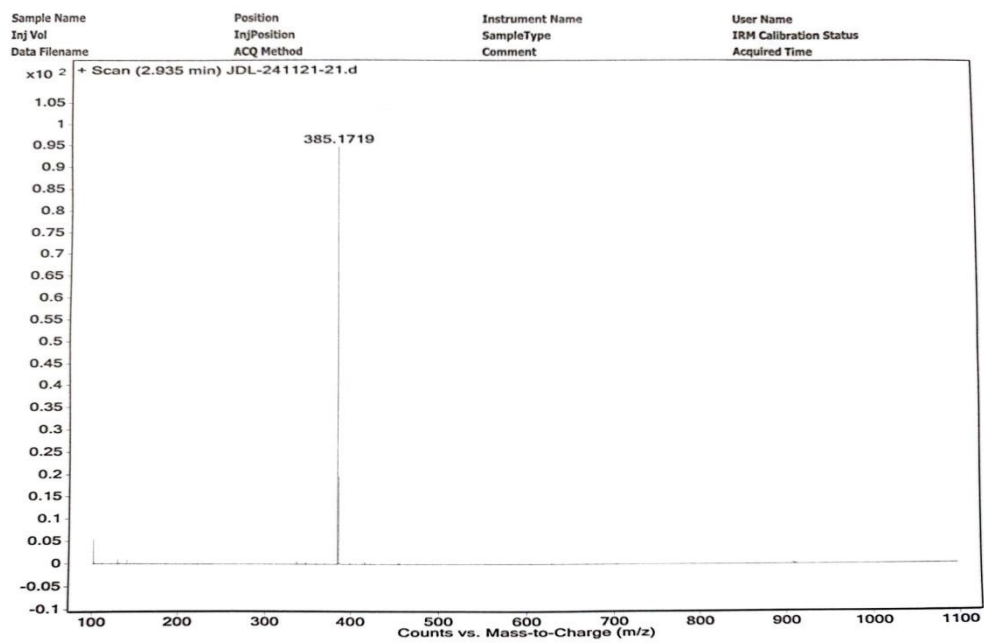

HR-MS of compound 36

*N*-(4-(1,5,7-trimethyl-1*H*-benzo[d]imidazol-2-yl)phenyl)cyclohexanecarboxamide (**37**)

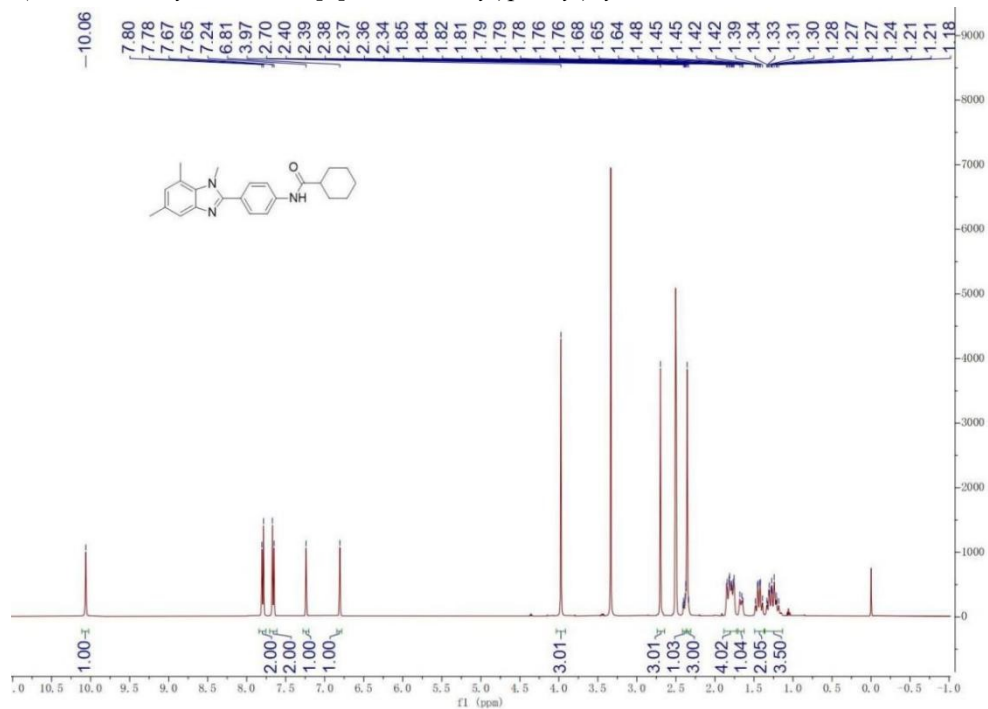

<sup>1</sup>H NMR of compound **37**

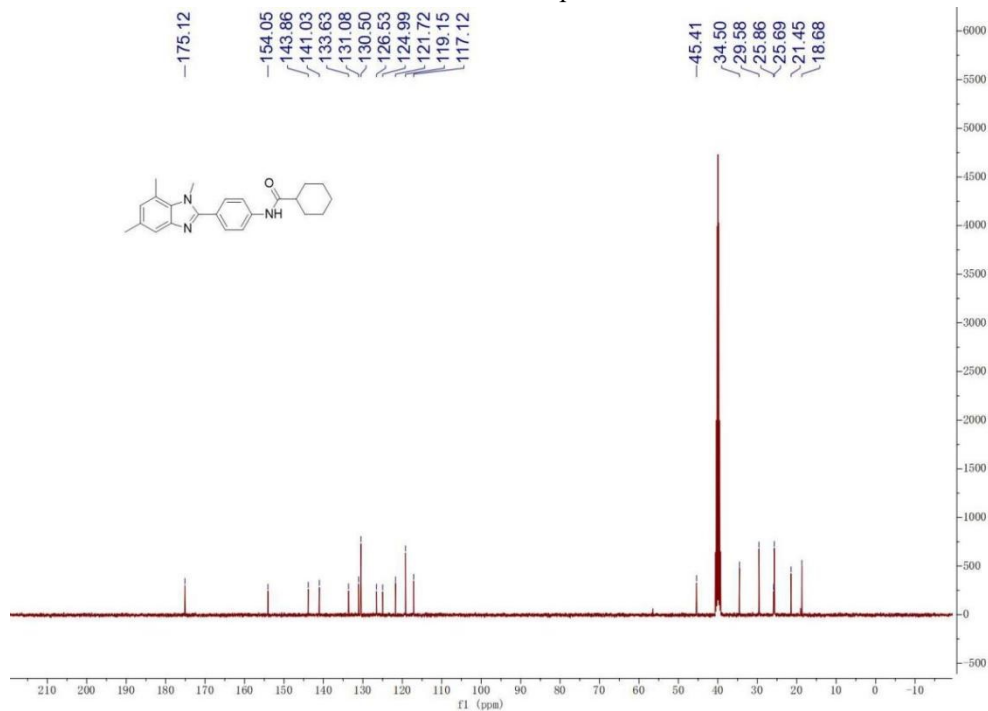

<sup>13</sup>C NMR of compound **37**

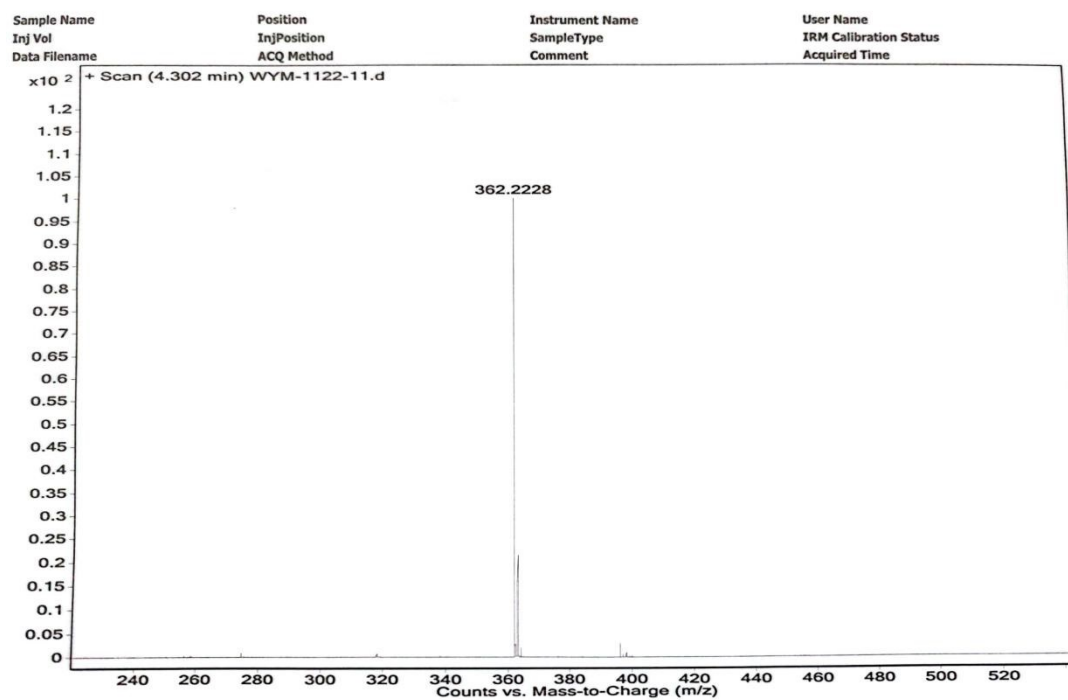

HR-MS of compound 37

4,4-difluoro-N-(4-(1,5,7-trimethyl-1H-benzo[d]imidazol-2-yl)phenyl)cyclohexane-1-carboxamide (38)

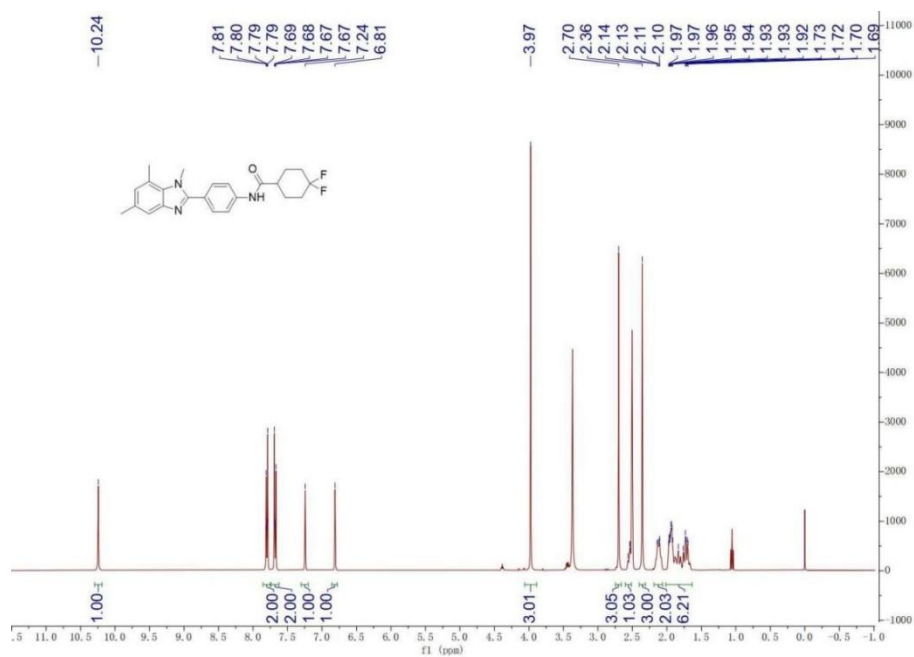

<sup>1</sup>H NMR of compound 38

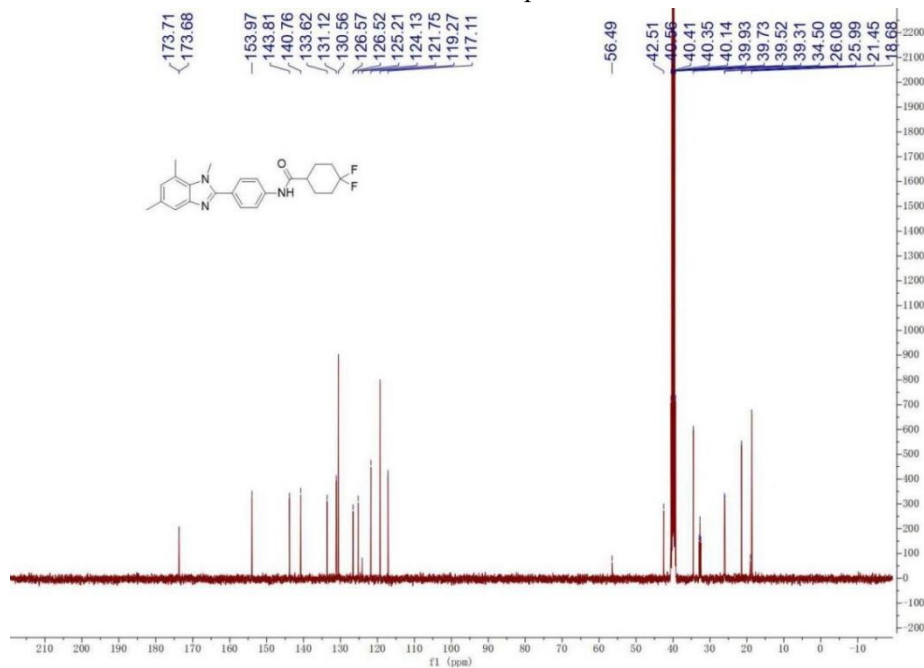

<sup>13</sup>C NMR of compound 38

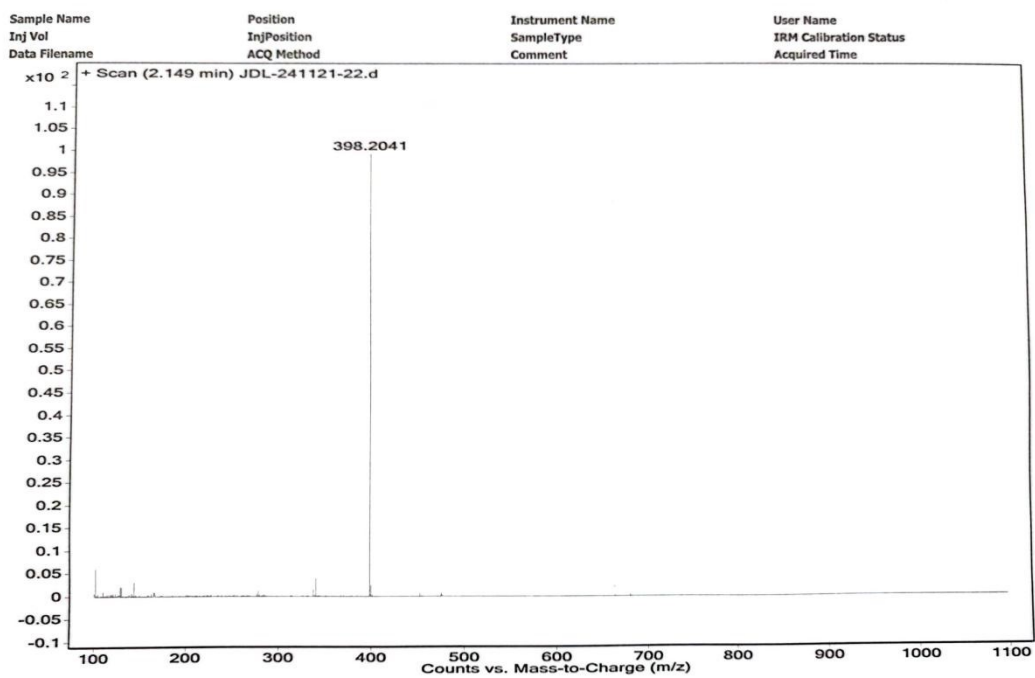

HR-MS of compound 38

*N*-(4-(1-methyl-1*H*-benzo[*d*]imidazol-2-yl)phenyl)cyclohexanecarboxamide (**39**)

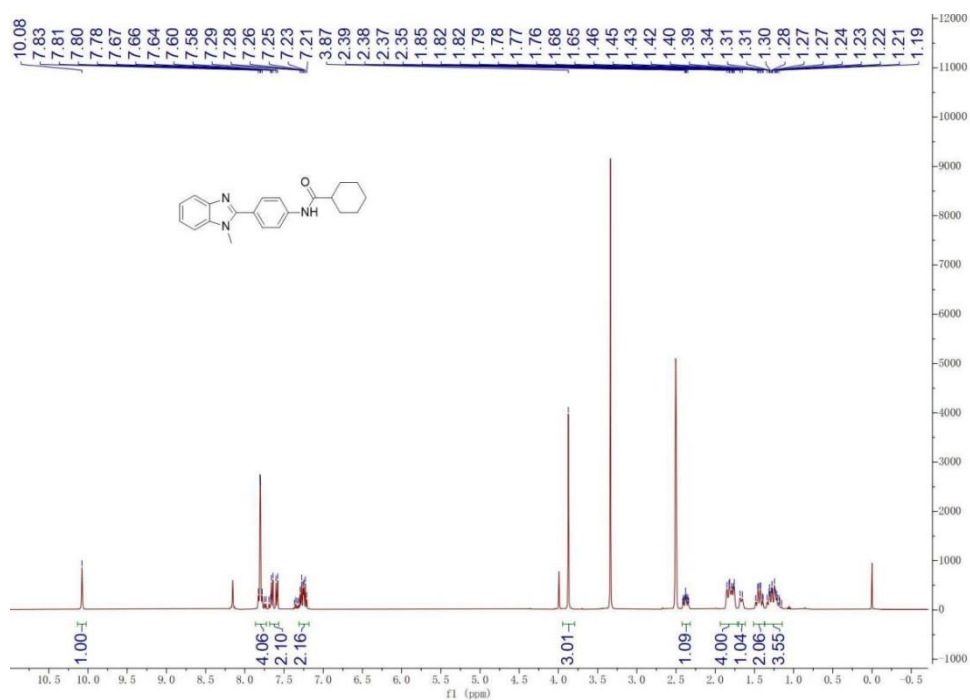

<sup>1</sup>H NMR of compound 39

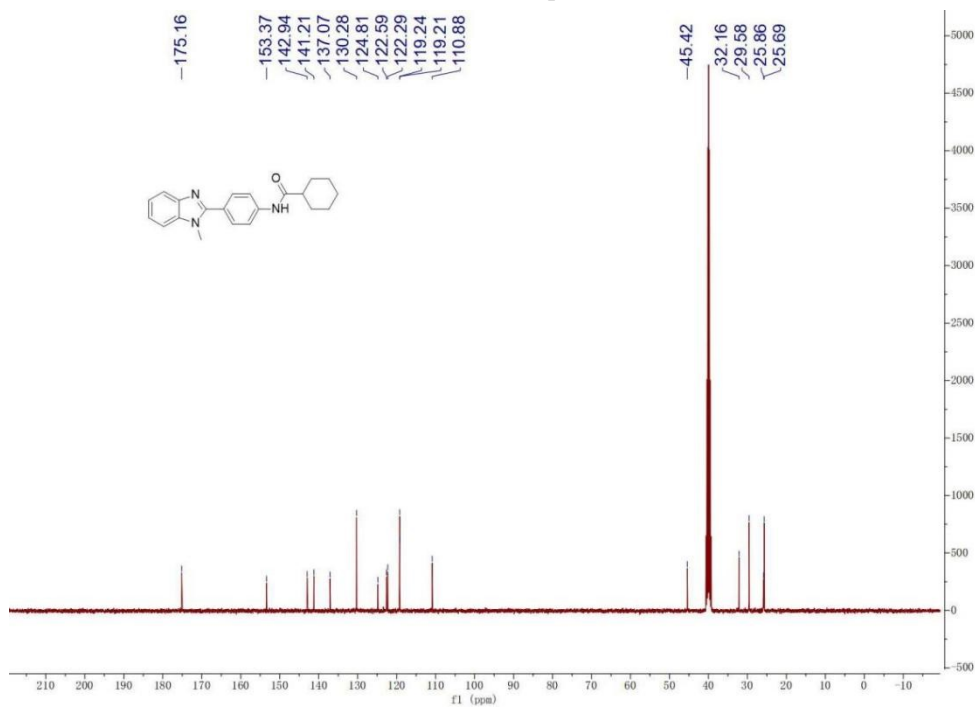

<sup>13</sup>C NMR of compound 39



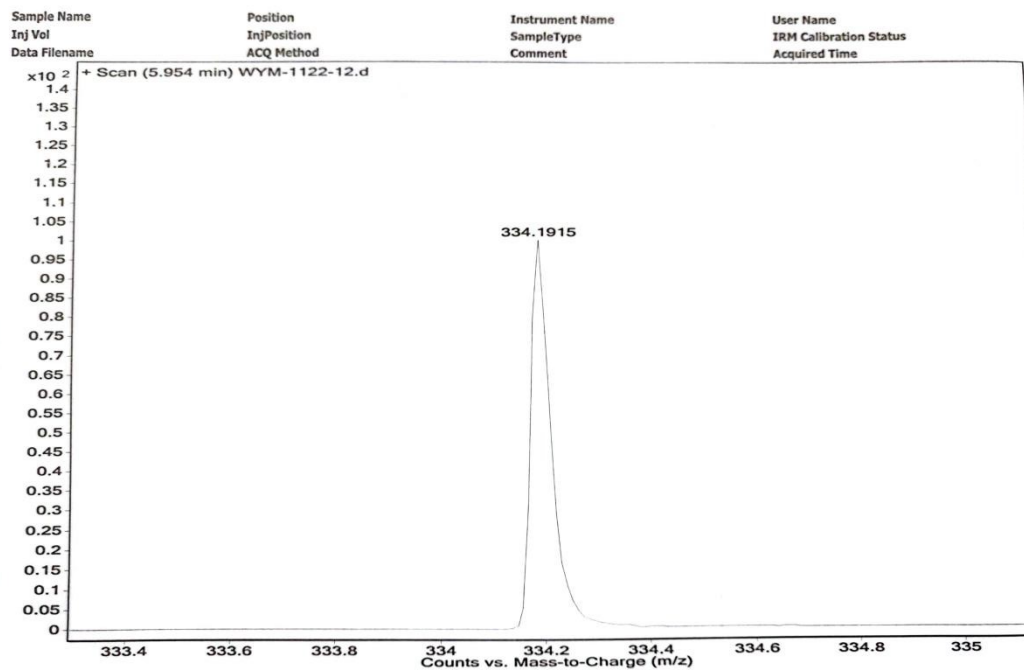

HR-MS of compound 39

N-(4-(6-chloro-1-methyl-1H-benzo[d]imidazol-2-yl)phenyl)cyclohexanecarboxamide (40)

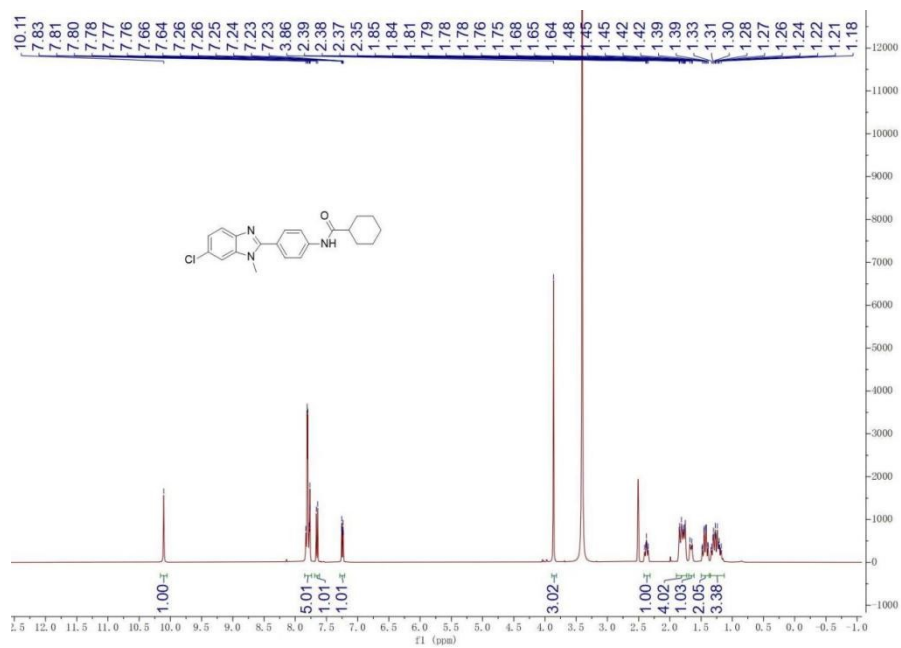

<sup>1</sup>H NMR of compound 40

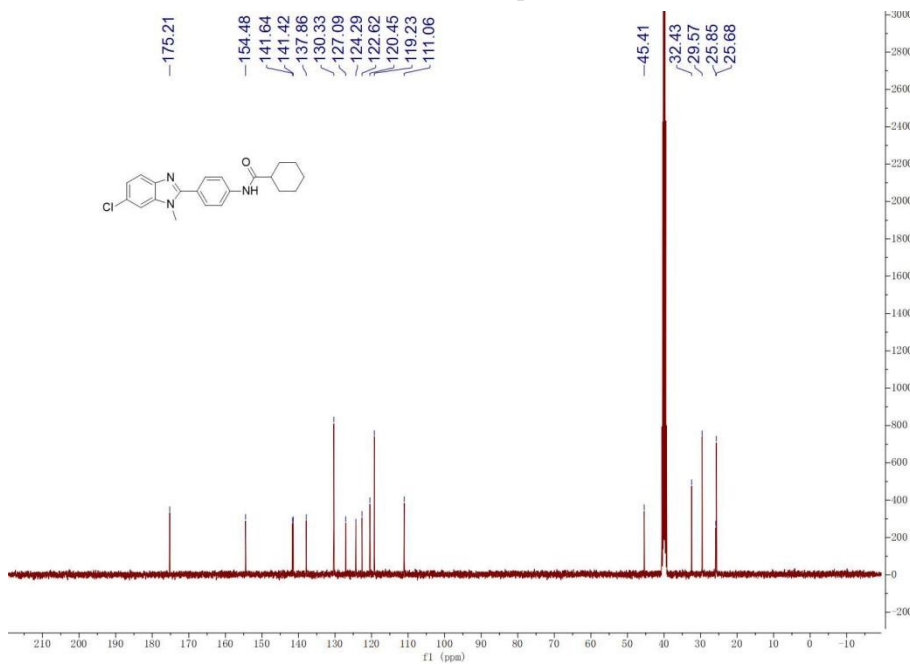

<sup>13</sup>C NMR of compound 40

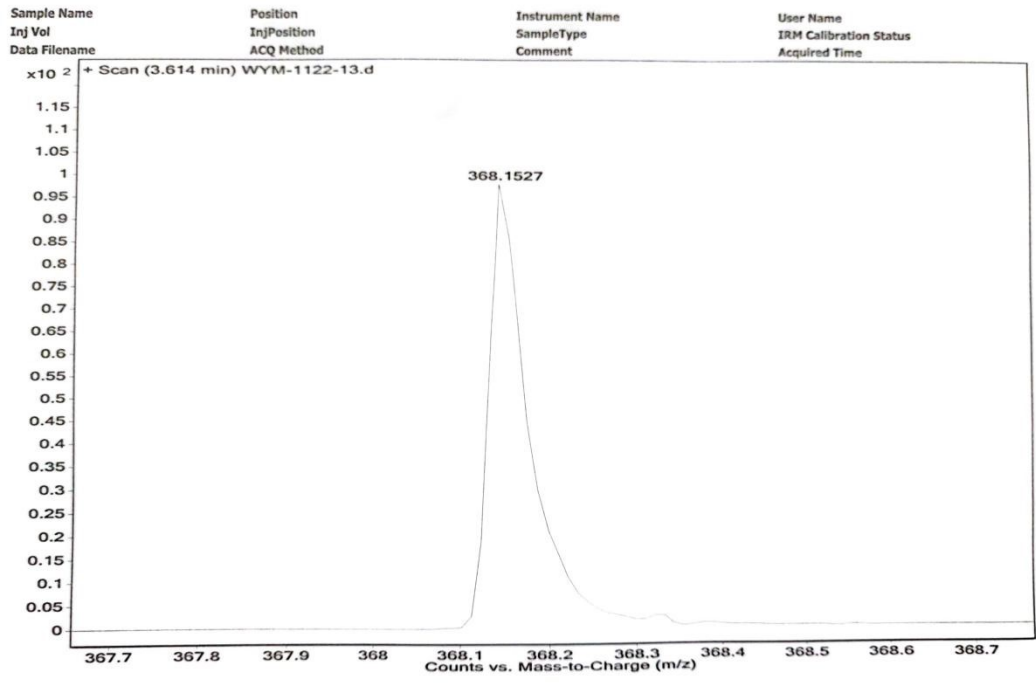

HR-MS of compound 40

*N*-(4-(1,5,6-trimethyl-1*H*-benzo[*d*]imidazol-2-yl)phenyl)cyclohexanecarboxamide (**41**)

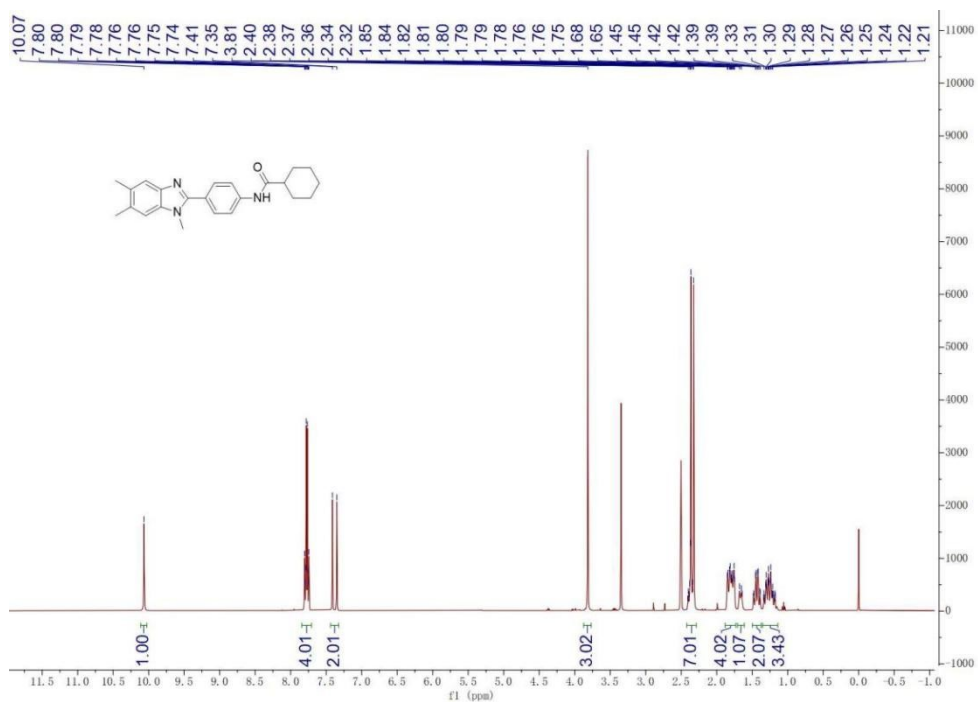

<sup>1</sup>H NMR of compound **41**

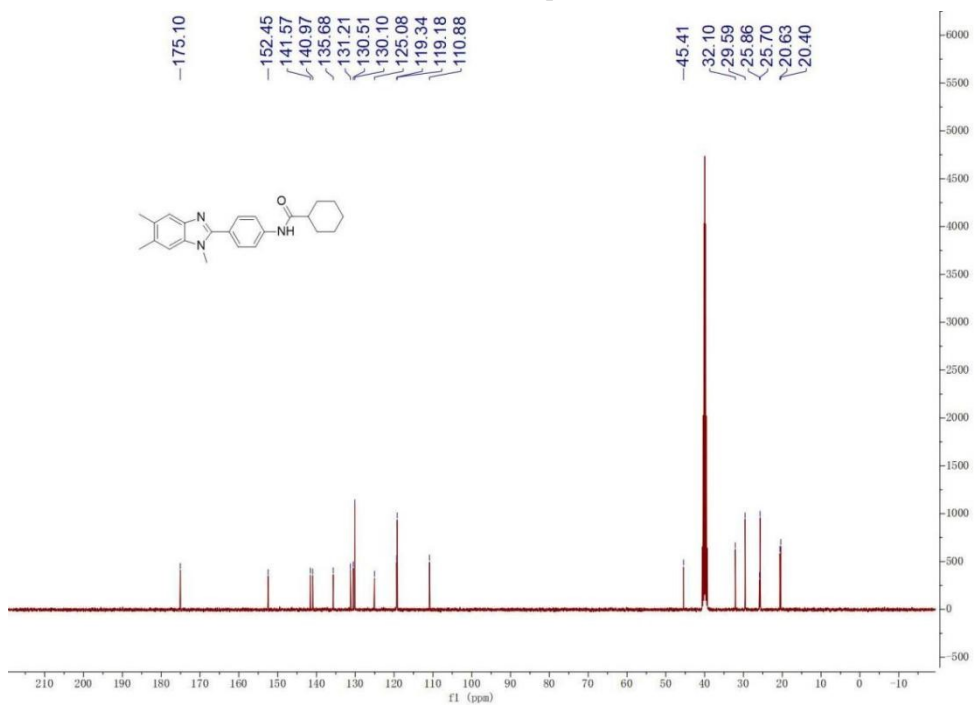

<sup>13</sup>C NMR of compound **41**

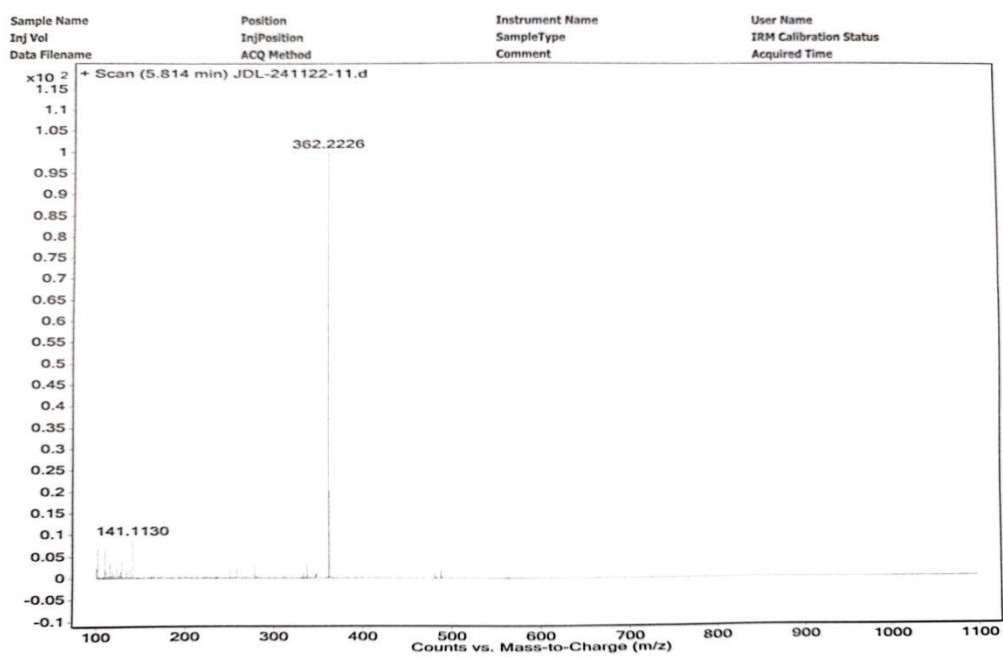

HR-MS of compound 41

*N*-(4-(5,6-dichloro-1-methyl-1*H*-benzo[d]imidazol-2-yl)phenyl)cyclohexanecarboxamide (42)

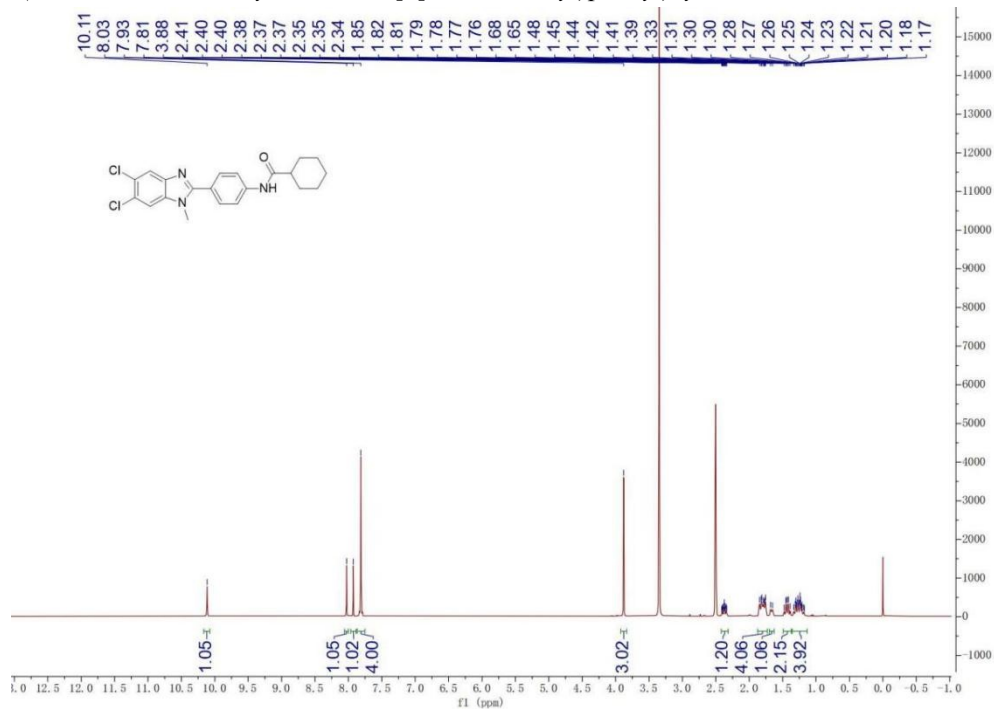

<sup>1</sup>H NMR of compound 42

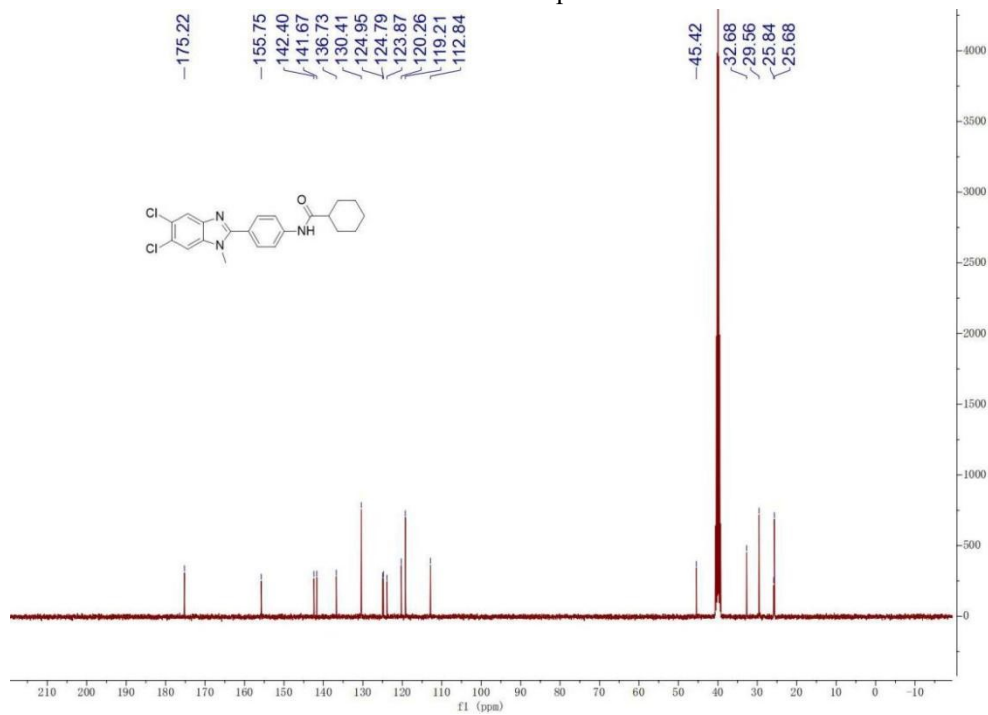

<sup>13</sup>C NMR of compound 42

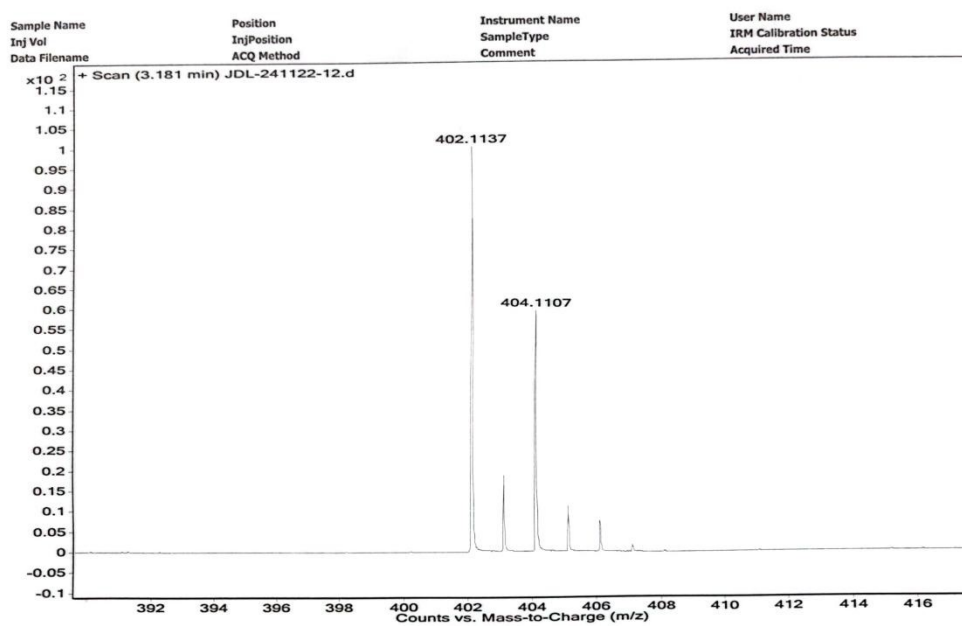

HR-MS of compound 42

4,4-difluoro-N-(4-(1-methyl-1H-benzo[d]imidazol-2-yl)phenyl)cyclohexane-1-carboxamide (43)

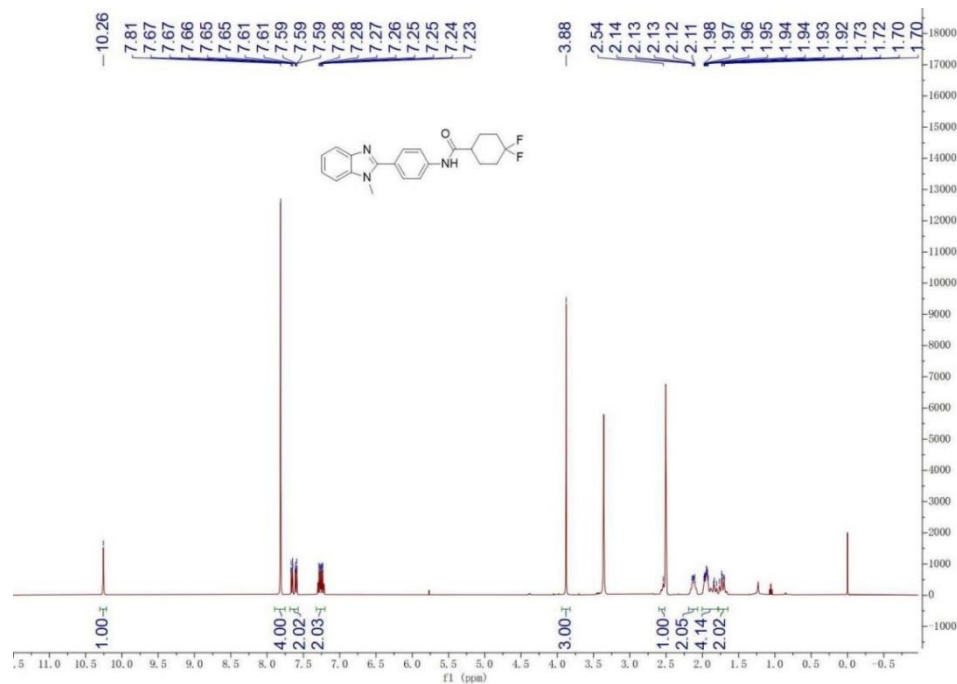

<sup>1</sup>H NMR of compound 43

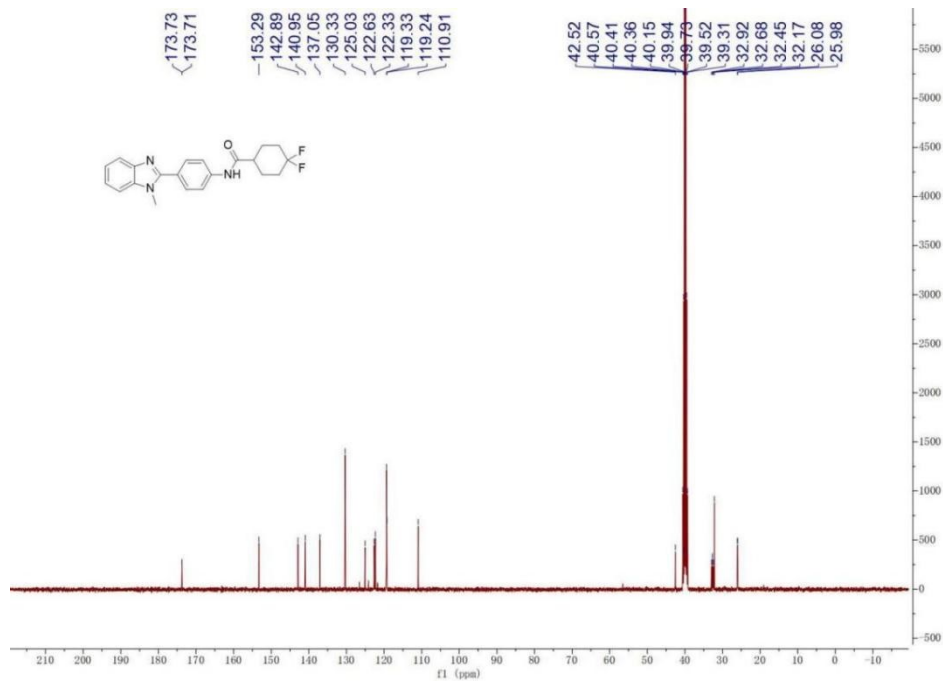

<sup>13</sup>C NMR of compound 43

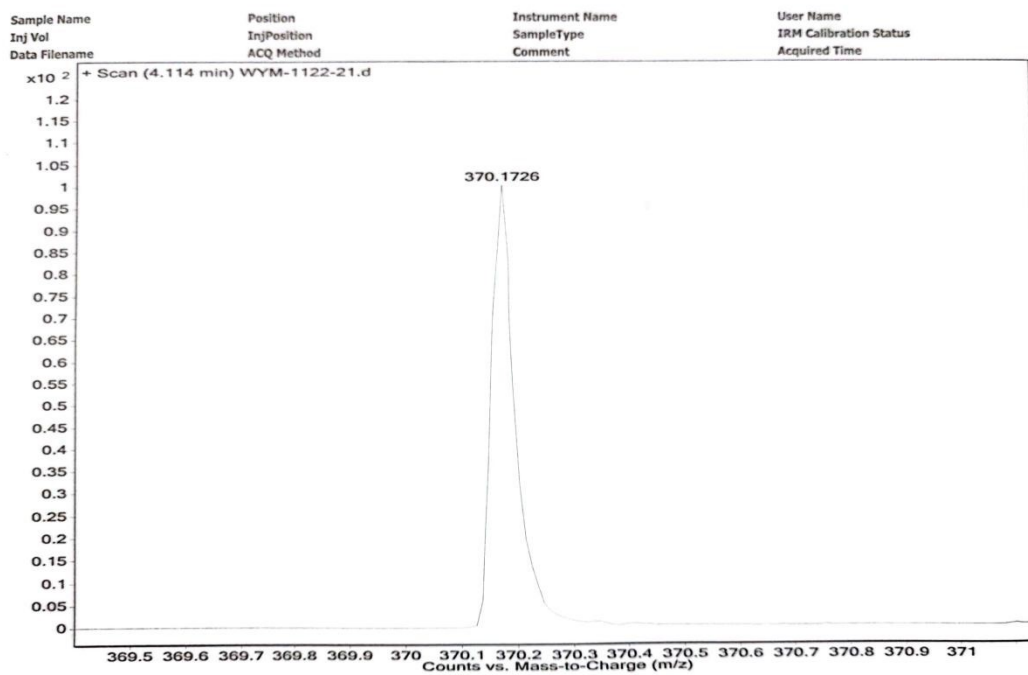

HR-MS of compound 43



*N*-(4-(6-chloro-1-methyl-1*H*-benzo[d]imidazol-2-yl)phenyl)-4,4-difluorocyclohexane-1-carboxamide (**44**)

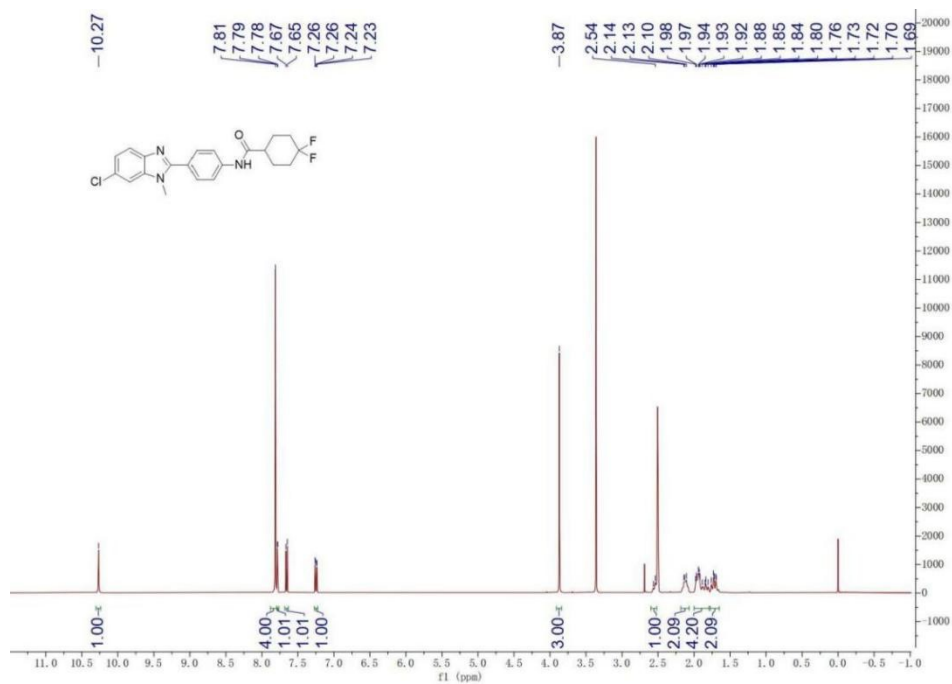

<sup>1</sup>H NMR of compound **44**

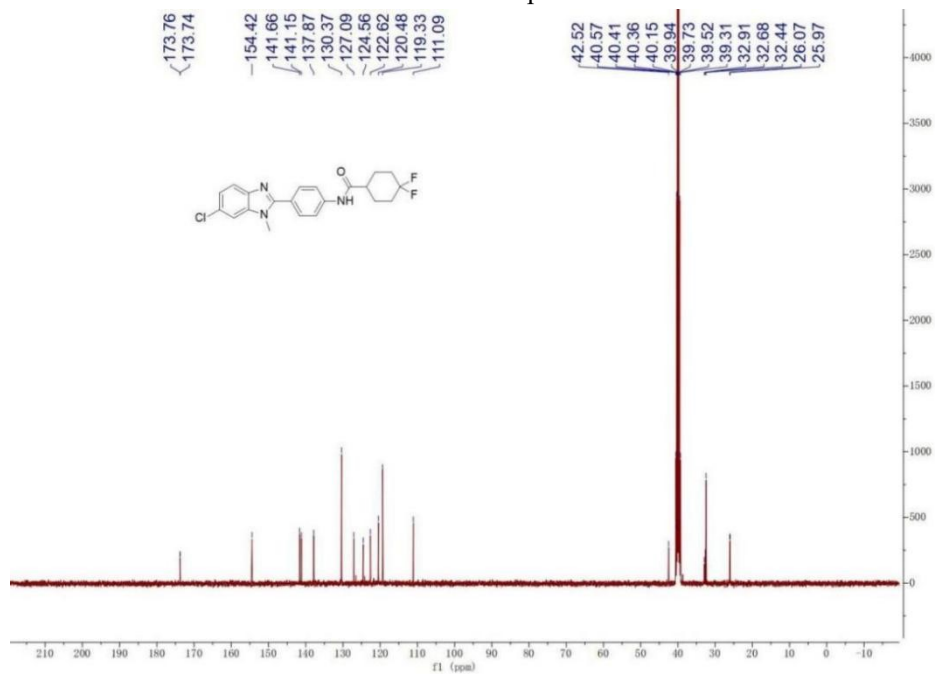

<sup>13</sup>C NMR of compound **44**

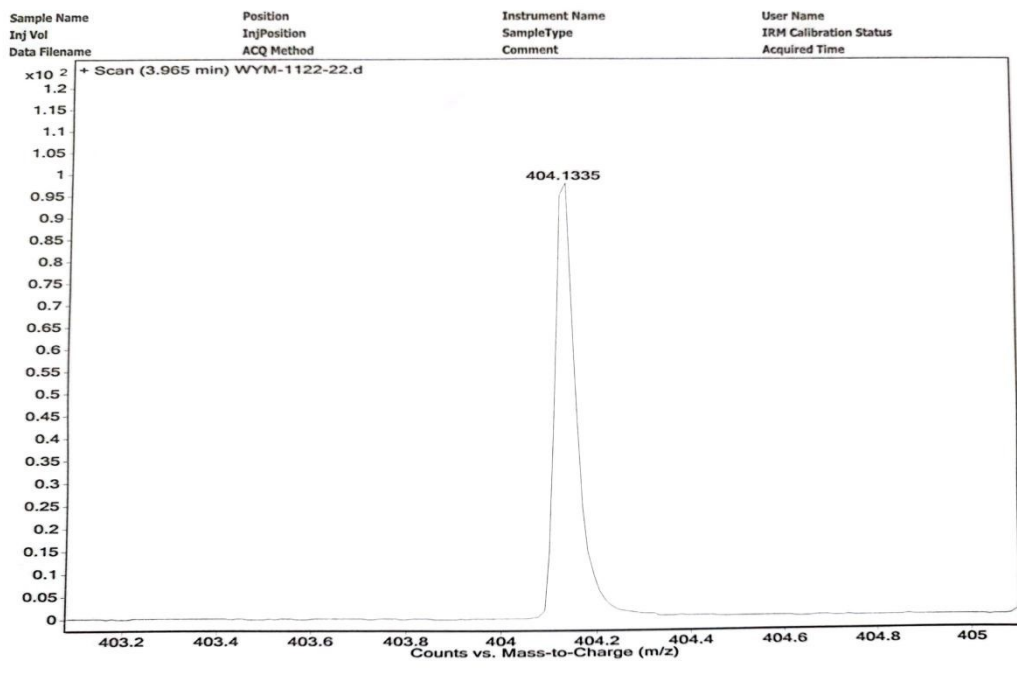

HR-MS of compound 44
